# Supplementary material for: Palladium-catalyzed decarboxylative domino synthesis of fused quinolin-2(1H)-one scaffolds containing a perfluoroalkyl unit
Source: Royal Society of Chemistry journal article supplement (doi:10.1039/d4qo01970a), 2024-12-20

## Supporting Information

### Palladium-Catalyzed Decarboxylative Domino Synthesis of Fused Quinolin-2(1*H*)-one Scaffolds Containing Perfluoroalkyl Unit

Shuwei Li,<sup>a</sup> Linqi Wang,<sup>a</sup> Shangyuan Wang,<sup>a</sup> and Jun Ying<sup>\*,a,b</sup>

<sup>a</sup> School of Chemistry and Chemical Engineering, Zhejiang Sci-Tech University, Hangzhou 310018, China.

<sup>b</sup> Zhejiang Sci-Tech University, Shengzhou Innovation Research Institute, Shengzhou 312400, China.  
*Supporting Information Placeholder*

### Table of Contents

|                                                                                                                              |     |
|------------------------------------------------------------------------------------------------------------------------------|-----|
| 1. General experimental information.....                                                                                     | S1  |
| 2. General procedure for the synthesis of substrates <sup>1,2</sup> .....                                                    | S2  |
| 3. General procedure for synthesis of fused quinolin-2(1 <i>H</i> )-one products (3aa-qa, 3sa, 4a-c, 5ab-ai, 6aj, 7a-e)..... | S5  |
| 4. Characterization data of products (3aa-qa, 3sa, 4a-c, 5ab-ai, 6aj, 7a-e) <sup>3,4,5</sup> .....                           | S6  |
| 5. X-ray crystal data for product 3pa (CCDC: 2377733).....                                                                   | S31 |
| 6. References.....                                                                                                           | S33 |
| 7. <sup>1</sup> H, <sup>13</sup> C, <sup>19</sup> F NMR spectra of products (3aa-qa, 3sa, 4a-c, 5ab-ai, 6aj, 7a-e).....      | S34 |

## 1. General experimental information

Unless otherwise noted, all reactions were carried out under nitrogen atmosphere. All commercially available reagents were used without further purification. All of the solvents were treated according to known methods. Column chromatography was performed on silica gel (200-400 mesh). <sup>1</sup>H NMR (400 MHz) chemical shifts were reported in ppm ( $\delta$ ) relative to tetramethylsilane (TMS) with the solvent resonance employed as the internal standard. <sup>13</sup>C NMR (100 MHz) chemical shifts were reported in ppm ( $\delta$ ) from tetramethylsilane (TMS) with the solvent resonance as the internal standard and <sup>19</sup>F NMR at (377 MHz) chemical shifts were reported in ppm ( $\delta$ ) relative to tetramethylsilane (TMS) with the solvent resonance employed as the internal standard. Data were reported as follows: chemical shift, multiplicity (s = singlet, d = doublet, t = triplet, q = quartet, dd = doublet of doublets, td = triplet of doublets, qd = quartet of doublets, m = multiplet), coupling constants (Hz) and integration. HRMS measurements were obtained on a TOF analyzer.

## 2. General procedure for the synthesis of substrates<sup>1,2</sup>

### 1a-h, 1n-1q, 1s (ref. 1)

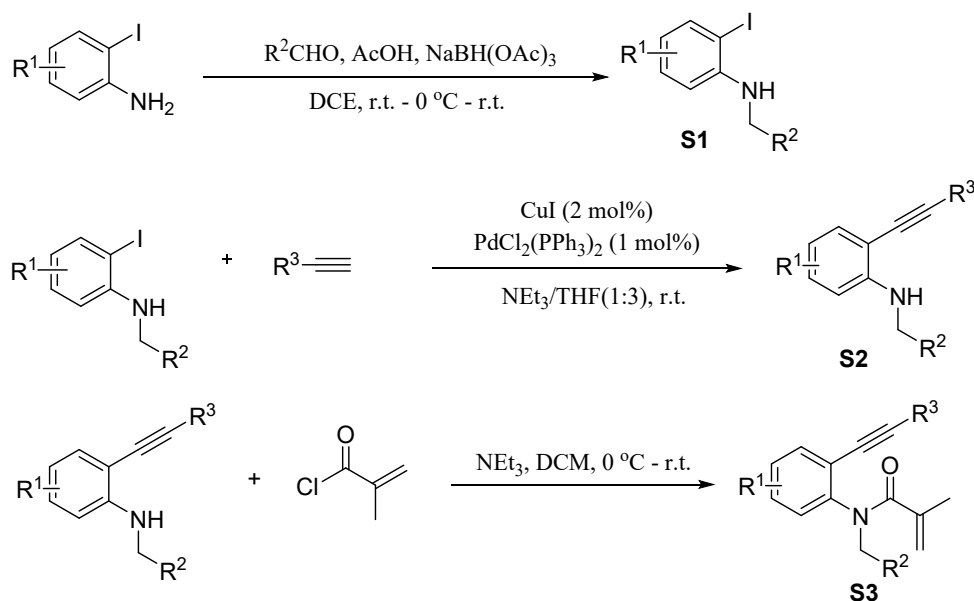

General procedure for synthesis of **S1**: To a 15 mL oven-dried tube charged with 2-iodoaniline (5.0 mmol, 1.0 equiv), aldehyde (6.0 mmol, 1.2 equiv) and dry 1,2-dichloroethane (8.0 mL) was added glacial acetic acid (30.0  $\mu$ L, 0.5 mmol, 10 mol%) at room temperature. The reaction was stirred at room temperature for 1 h. Then NaBH(OAc)<sub>3</sub> (2.1 g, 10.0 mmol, 2.0 equiv) was added for portions at 0 °C. The mixture was allowed to stir at room temperature for 12 h. The resulting reaction mixture was cooled to 0 °C and water (2.0 mL) was added. The residue was extracted with ethyl acetate twice and the combined organic phase was dried over anhydrous Na<sub>2</sub>SO<sub>4</sub>, filtrated and concentrated. The resulting crude mixture was purified by flash chromatography using petroleum ether / ethyl acetate = 50:1 as eluent.

General procedure for synthesis of **S2**: To a suspension of PdCl<sub>2</sub>(PPh<sub>3</sub>)<sub>2</sub> (0.1 mmol, 1 mol%) and CuI (0.2 mmol, 2 mol%) in a mixture of THF (30.0 mL) and Et<sub>3</sub>N (10.0 mL) was added **S1** (10.0 mmol) and alkyne (12.0 mmol, 1.2 equiv). The reaction was allowed to react at room temperature for 12 h. Then, the crude mixture was filtered through a shot pad of Celite and washed with CH<sub>2</sub>Cl<sub>2</sub> (10.0 mL) for three times, and the combined organic layer was concentrated under reduced pressure. The resulting mixture was purified by flash chromatography using petroleum ether / ethyl acetate = 50:1 as eluent.

General procedure for the synthesis of substrates **S3**: To a stirred solution of **S2** (1.0 equiv) in S2

CH<sub>2</sub>Cl<sub>2</sub> (5.0 mL) was added methacryloyl chloride (1.5 equiv) and Et<sub>3</sub>N (2.0 equiv) at 0 °C. The resulted mixture was stirred at room temperature for 12 h. Then, the reaction was quenched by saturated NaHCO<sub>3</sub> solution and the reaction mixture was extracted with CH<sub>2</sub>Cl<sub>2</sub> for three times. The combined organic layer was dried over anhydrous Na<sub>2</sub>SO<sub>4</sub> and concentrated in vacuo. The resulting crude mixture was purified by flash chromatography using petroleum ether / ethyl acetate = 10:1 as eluent.

**1i-m (ref. 2)**

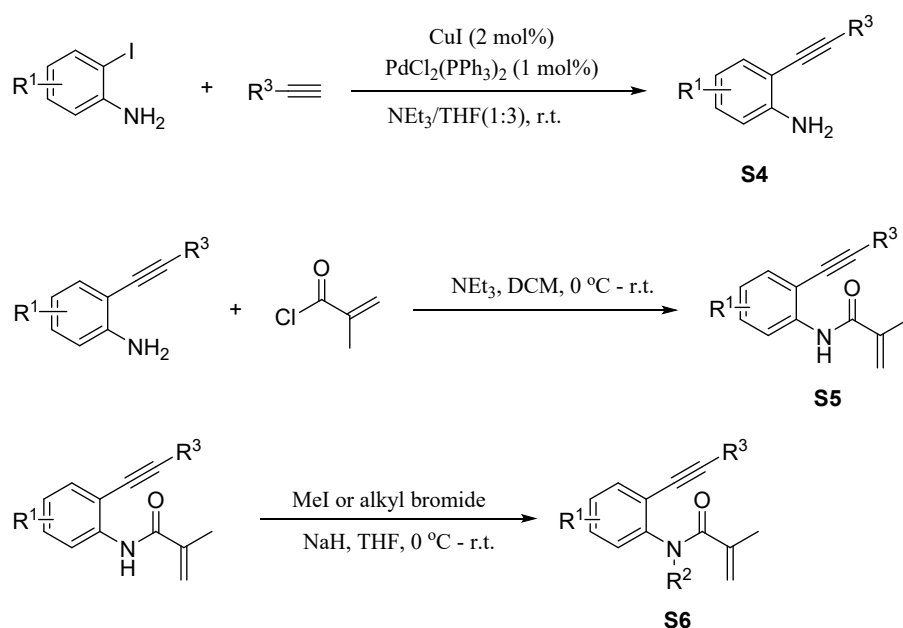

General procedure for synthesis of **S4**: To a suspension of PdCl<sub>2</sub>(PPh<sub>3</sub>)<sub>2</sub> (0.1 mmol, 1 mol%) and CuI (0.2 mmol, 2 mol%) in a mixture of THF (30.0 mL) and Et<sub>3</sub>N (10.0 mL) was added 2-iodoaniline (10.0 mmol) and alkyne (12.0 mmol, 1.2 equiv). The reaction was allowed to react at room temperature for 12 h. Then, the crude mixture was filtered through a shot pad of Celite and washed with CH<sub>2</sub>Cl<sub>2</sub> (10.0 mL) for three times, and the combined organic layer was concentrated under reduced pressure. The resulting mixture was purified by flash chromatography using petroleum ether / ethyl acetate = 50:1 as eluent.

General procedure for synthesis of **S5**: To a stirred solution of **S4** (1.0 equiv) in CH<sub>2</sub>Cl<sub>2</sub> (5.0 mL) was added methacryloyl chloride (1.5 equiv) and Et<sub>3</sub>N (2.0 equiv) at 0 °C. The resulted mixture was stirred at room temperature for 12 h. Then, the reaction was quenched by saturated NaHCO<sub>3</sub> solution and the reaction mixture was extracted with CH<sub>2</sub>Cl<sub>2</sub> for three times. The combined organic

layer was dried over anhydrous  $\text{Na}_2\text{SO}_4$  and concentrated in vacuo. The resulting crude mixture was purified by flash chromatography using petroleum ether / ethyl acetate = 20:1 as eluent.

General procedure for the synthesis of substrates **S6**: To a solution of NaH (2.0 equiv) in THF (5.0 mL) at 0 °C was added a solution of **S5** (1.0 equiv) in THF dropwise and the reaction mixture was stirred for 30 min. Then, iodomethane or alkyl bromide (1.5 equiv) was added and the reaction mixture was stirred at room temperature. Upon completion, the reaction was quenched by water and extracted with  $\text{CH}_2\text{Cl}_2$  for three times. The combined organic layer was washed with brine and dried over anhydrous  $\text{Na}_2\text{SO}_4$ . The solvent was removed under vacuum and the residue was purified by a flash column chromatography on silica gel using petroleum ether / ethyl acetate = 10:1 as eluent.

**3. General procedure for synthesis of fused quinolin-2(1H)-one products (3aa-qa, 3sa, 4a-c, 5ab-ai, 6aj, 7a-e)**

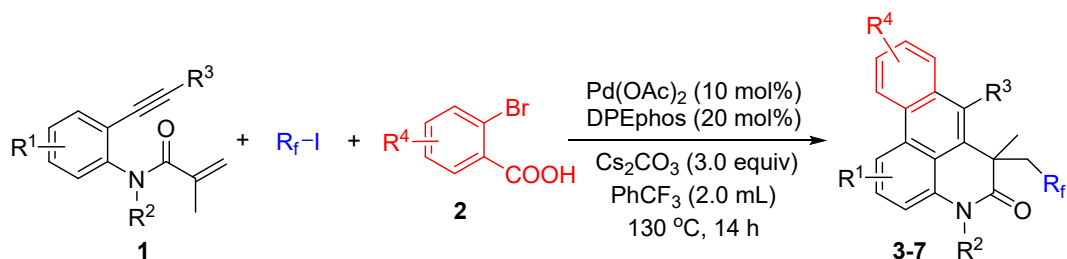

1,7-enyne **1** (0.2 mmol, 1.0 equiv), *o*-bromobenzoic acid **2** (0.4 mmol, 2.0 equiv),  $Pd(OAc)_2$  (4.5 mg, 10 mol%), DPEphos (21.5 mg, 20 mol%),  $Cs_2CO_3$  (195.0 mg, 0.6 mmol, 3.0 equiv), and perfluoroalkyl iodide (1.2 mmol, 6.0 equiv) were added to an oven-dried tube (15.0 mL) which was then placed under vacuum and refilled with nitrogen three times.  $PhCF_3$  (2.0 mL) was added into the tube via syringe and the tube was sealed and stirred at 130 °C (oil bath) for 14 h. Upon the reaction was completed, the resulting mixture was purified by silica gel column using chromatography (petroleum ether / ethyl acetate = 20:1) to obtain products (**3aa-qa**, **3sa**, **4a-c**, **5ab-ai**, **6aj**, **7a-e**).

#### 4. Characterization data of products (3aa-qa, 3sa, 4a-c, 5ab-ai, 6aj, 7a-e)

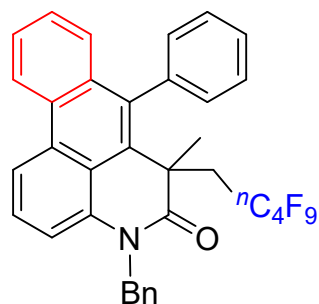

**4-benzyl-6-methyl-6-(2,2,3,3,4,4,5,5,5-nonafluoropentyl)-7-phenyl-4H-naphtho[3,2,1-de]quinolin-5(6H)-one (3aa).** The product was purified by column chromatography (petroleum ether / ethyl acetate = 20:1); White solid, 91.9 mg, 71% yield; mp 154.8-156.0 °C;  $^1\text{H}$  NMR (400 MHz,  $\text{CDCl}_3$ )  $\delta$  8.68 (d,  $J = 8.4$  Hz, 1H), 8.45 (d,  $J = 8.4$  Hz, 1H), 7.61 (d,  $J = 7.3$  Hz, 1H), 7.55 (m, 4H), 7.50 (d,  $J = 6.5$  Hz, 1H), 7.41 – 7.36 (m, 2H), 7.34 (d,  $J = 4.4$  Hz, 4H), 7.30 – 7.26 (m, 1H), 7.16 (d,  $J = 7.9$  Hz, 1H), 6.94 (d,  $J = 8.5$  Hz, 1H), 5.45 (dd,  $J = 42.3, 14.4$  Hz, 2H), 3.26 (dd,  $J = 34.7, 15.3$  Hz, 1H), 3.13 – 2.94 (m, 1H), 1.91 (s, 3H);  $^{13}\text{C}$  NMR (100 MHz,  $\text{CDCl}_3$ )  $\delta$  173.3, 139.9, 137.8, 136.6, 136.3, 134.0, 133.4, 131.99, 131.96, 131.1, 129.8, 129.2, 128.9, 128.25, 128.18, 127.9, 127.6, 127.32, 127.27, 127.1, 126.9, 126.5, 122.8, 118.0, 117.8, 112.6, 47.9, 45.3, 39.7 (t,  $J = 18.1$  Hz), 31.9;  $^{19}\text{F}$  NMR (377 MHz,  $\text{CDCl}_3$ )  $\delta$  -80.99 (s, 3F), -108.88 – -110.15 (m, 1F), -110.98 – -112.17 (m, 1F), -123.33 – -125.42 (m, 2F), -125.87 (s, 2F); HRMS (ESI-TOF)  $m/z$ :  $[\text{M}+\text{Na}]^+$  Calcd. for  $\text{C}_{35}\text{H}_{24}\text{F}_9\text{NNaO}^+$  : 668.1606; found: 668.1615.

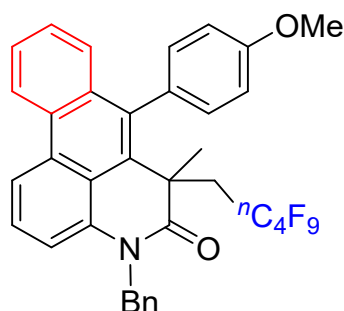

**4-benzyl-7-(4-methoxyphenyl)-6-methyl-6-(2,2,3,3,4,4,5,5,5-nonafluoropentyl)-4H-naphtho[3,2,1-de]quinolin-5(6H)-one (3ba).** The product was purified by column chromatography (petroleum ether / ethyl acetate = 20:1); White solid, 74.6 mg, 55% yield; mp 212.5-213.7 °C;  $^1\text{H}$  NMR (400 MHz,  $\text{CDCl}_3$ )  $\delta$  8.71 (d,  $J = 8.4$  Hz, 1H), 8.49 (d,  $J = 8.5$  Hz, 1H), 7.63 (t,  $J = 7.6$  Hz, 1H), 7.55 (t,  $J = 8.1$  Hz, 1H), 7.43 (m, 2H), 7.37 (d,  $J = 4.4$  Hz, 4H), 7.30 (dd,  $J = 7.4, 3.6$  Hz, 2H),

7.18 (d,  $J = 7.9$  Hz, 1H), 7.15 – 7.09 (m, 2H), 7.03 (d,  $J = 8.4$  Hz, 1H), 5.47 (dd,  $J = 43.6, 14.5$  Hz, 2H), 4.00 (s, 3H), 3.30 (dd,  $J = 34.6, 15.0$  Hz, 1H), 3.11 (m, 1H), 1.96 (s, 3H);  $^{13}\text{C}$  NMR (100 MHz,  $\text{CDCl}_3$ )  $\delta$  173.4, 159.4, 137.6, 136.6, 136.3, 134.5, 134.4, 133.1, 133.0, 131.6, 131.0, 130.2, 129.3, 128.9, 127.6, 127.3, 127.0, 126.9, 126.5, 122.8, 117.95, 117.90, 113.6, 113.3, 112.6, 55.5, 47.8, 45.3, 39.6 (t,  $J = 18.1$  Hz), 32.0;  $^{19}\text{F}$  NMR (377 MHz,  $\text{CDCl}_3$ )  $\delta$  -80.98 (s, 3F), -108.90 – -110.15 (m, 1F), -110.70 – -112.39 (m, 1F), -124.35 (dd, 2F), -125.84 (d,  $J = 9.9$  Hz, 2F); HRMS (ESI-TOF)  $m/z$ :  $[\text{M}+\text{Na}]^+$  Calcd. for  $\text{C}_{36}\text{H}_{26}\text{F}_9\text{NNaO}_2^+$  : 698.1712; found: 698.1721.

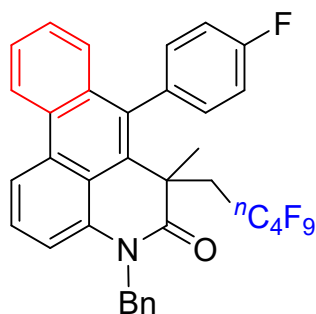

**4-benzyl-7-(4-fluorophenyl)-6-methyl-6-(2,2,3,3,4,4,5,5,5-nonafluoropentyl)-4H-**

**naphtho[3,2,1-*de*]quinolin-5(6H)-one (3ca).** The product was purified by column chromatography (petroleum ether / ethyl acetate = 20:1); White solid, 84.5 mg, 64% yield; mp 190.8-192.0 °C;  $^1\text{H}$  NMR (400 MHz,  $\text{CDCl}_3$ )  $\delta$  8.69 (d,  $J = 8.4$  Hz, 1H), 8.46 (d,  $J = 8.4$  Hz, 1H), 7.61 (t,  $J = 7.5$  Hz, 1H), 7.53 (t,  $J = 8.1$  Hz, 1H), 7.49 – 7.45 (m, 1H), 7.42 (t,  $J = 7.7$  Hz, 1H), 7.35 (d,  $J = 4.3$  Hz, 5H), 7.31 – 7.23 (m, 3H), 7.17 (d,  $J = 7.9$  Hz, 1H), 6.93 (d,  $J = 8.4$  Hz, 1H), 5.45 (dd,  $J = 40.8, 14.9$  Hz, 2H), 3.32 (dd,  $J = 34.8, 15.3$  Hz, 1H), 2.97 (m, 1H), 1.91 (s, 3H);  $^{13}\text{C}$  NMR (100 MHz,  $\text{CDCl}_3$ )  $\delta$  173.1, 162.6 (d,  $J = 248.7$  Hz), 136.7, 136.4 (d,  $J = 20.3$  Hz), 135.7 (d,  $J = 3.7$  Hz), 135.1 (d,  $J = 7.7$  Hz), 134.0, 133.6, 131.1, 130.3, 129.3, 128.9, 127.4 (d,  $J = 20.5$  Hz), 127.2, 127.0, 126.5, 122.9, 118.0, 117.7, 115.4, 115.3, 115.2, 115.1, 112.7, 47.9, 45.3, 39.7 (t,  $J = 18.1$  Hz), 32.0;  $^{19}\text{F}$  NMR (377 MHz,  $\text{CDCl}_3$ )  $\delta$  -80.97 (s, 3F), -108.96 – -110.15 (m, 1F), -111.01 – -112.35 (m, 1F), -113.21 (s, 1F), -123.34 – -125.39 (m, 2F), -125.82 (d,  $J = 11.1$  Hz, 2F); HRMS (ESI-TOF)  $m/z$ :  $[\text{M}+\text{Na}]^+$  Calcd. for  $\text{C}_{35}\text{H}_{23}\text{F}_{10}\text{NNaO}^+$  : 686.1512; found: 686.1517.



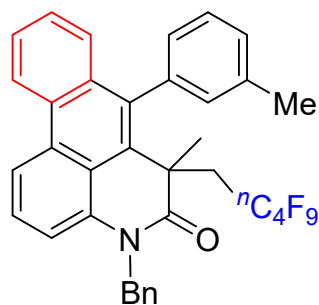

**4-benzyl-6-methyl-6-(2,2,3,3,4,4,5,5,5-nonafluoropentyl)-7-(*m*-tolyl)-4H-naphtho[3,2,1-*de*]quinolin-5(6H)-one (3da).** The product was purified by column chromatography (petroleum ether / ethyl acetate = 20:1); White solid, 85.9 mg, 65% yield; mp 171.2-172.4 °C; <sup>1</sup>H NMR (400 MHz, CDCl<sub>3</sub>) δ 8.67 (d, *J* = 8.4 Hz, 1H), 8.45 (d, *J* = 8.4 Hz, 1H), 7.59 (t, *J* = 7.6 Hz, 1H), 7.51 (t, *J* = 8.1 Hz, 1H), 7.45 – 7.38 (m, 2H), 7.35 (s, 1H), 7.33 (d, *J* = 4.3 Hz, 4H), 7.29 (s, 1H), 7.26 (s, 1H), 7.16 (dd, *J* = 13.2, 7.7 Hz, 2H), 6.97 (d, *J* = 8.4 Hz, 1H), 5.43 (dd, *J* = 52.4, 15.2 Hz, 2H), 3.36 – 2.82 (m, 2H), 2.44 (s, 3H), 1.91 (s, 3H); <sup>13</sup>C NMR (100 MHz, CDCl<sub>3</sub>) δ 173.3, 139.7, 138.0, 137.9, 136.6, 136.3, 134.0, 132.7, 131.0, 130.5, 129.7, 129.2, 128.9, 128.8, 127.8, 127.7, 127.3, 127.0, 126.9, 126.5, 122.8, 118.0, 117.8, 112.6, 47.8, 45.3, 39.5 (t, *J* = 17.7 Hz), 32.0, 21.4; <sup>19</sup>F NMR (377 MHz, CDCl<sub>3</sub>) δ -81.02 (s, 3F), -109.08 – -110.29 (m, 1F), -110.86 – -112.03 (m, 1F), -123.47 – -125.47 (m, 2F), -125.88 (s, 2F); HRMS (ESI-TOF) *m/z*: [M+Na]<sup>+</sup> Calcd. for C<sub>36</sub>H<sub>26</sub>F<sub>9</sub>NNaO<sup>+</sup> : 682.1763; found: 682.1761.

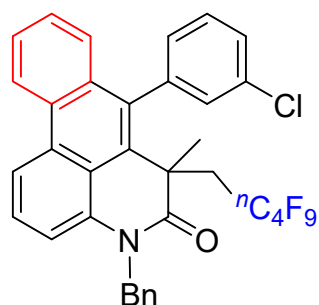

**4-benzyl-7-(3-chlorophenyl)-6-methyl-6-(2,2,3,3,4,4,5,5,5-nonafluoropentyl)-4H-naphtho[3,2,1-*de*]quinolin-5(6H)-one (3ea).** The product was purified by column chromatography (petroleum ether / ethyl acetate = 20:1); White solid, 78.4 mg, 58% yield; mp 145.6-146.8 °C; <sup>1</sup>H NMR (400 MHz, CDCl<sub>3</sub>) δ 8.69 (d, *J* = 8.3 Hz, 1H), 8.45 (d, *J* = 8.3 Hz, 1H), 7.64 – 7.58 (m, 1H), 7.54 (t, *J* = 8.2 Hz, 2H), 7.51 – 7.46 (m, 2H), 7.45 – 7.39 (m, 1H), 7.35 – 7.32 (m, 4H), 7.30 – 7.27 (m, 2H), 7.16 (d, *J* = 7.8 Hz, 1H), 6.93 (d, *J* = 8.0 Hz, 1H), 5.44 (dd, *J* = 43.5, 15.0 Hz, 2H), 3.31

(dd,  $J = 34.8, 15.3$  Hz, 1H), 3.06 – 2.82 (m, 1H), 1.89 (s, 3H);  $^{13}\text{C}$  NMR (100 MHz,  $\text{CDCl}_3$ )  $\delta$  173.0, 141.8, 136.5, 136.4, 136.2, 134.6, 133.5, 132.12, 132.08, 131.6, 131.2, 130.1, 129.3, 129.2, 129.0, 128.5, 127.6, 127.32, 127.29, 127.1, 126.5, 122.9, 118.0, 117.6, 112.8, 47.9, 45.2, 39.7 (t,  $J = 18.4$  Hz), 32.0;  $^{19}\text{F}$  NMR (377 MHz,  $\text{CDCl}_3$ )  $\delta$  -80.98 (s, 3F), -109.14 – -110.21 (m, 1F), -111.19 – -112.38 (m, 1F), -123.99 – -124.76 (m, 2F), -125.83 (s, 2F); HRMS (ESI-TOF)  $m/z$ :  $[\text{M}+\text{Na}]^+$  Calcd. for  $\text{C}_{35}\text{H}_{23}\text{ClF}_9\text{NNaO}^+$  : 702.1217; found: 702.1224.

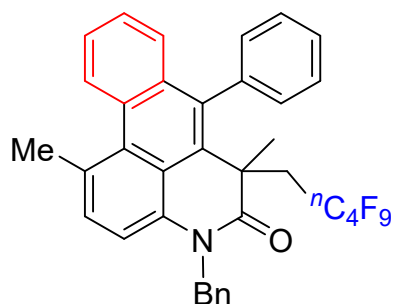

**4-benzyl-1,6-dimethyl-6-(2,2,3,3,4,4,5,5,5-nonafluoropentyl)-7-phenyl-4H-naphtho[3,2,1-de]quinolin-5(6H)-one (3fa).** The product was purified by column chromatography (petroleum ether / ethyl acetate = 20:1); White solid, 59.7 mg, 45% yield; mp 145.1-146.3 °C;  $^1\text{H}$  NMR (400 MHz,  $\text{CDCl}_3$ )  $\delta$  8.63 (d,  $J = 8.5$  Hz, 1H), 7.52 (dt,  $J = 9.4, 7.5$  Hz, 4H), 7.47 (d,  $J = 6.5$  Hz, 1H), 7.36 (t,  $J = 7.2$  Hz, 3H), 7.32 (d,  $J = 4.5$  Hz, 4H), 7.24 (d,  $J = 4.9$  Hz, 1H), 7.07 (d,  $J = 8.2$  Hz, 1H), 6.99 (d,  $J = 8.4$  Hz, 1H), 5.41 (dd,  $J = 59.6, 16.1$  Hz, 2H), 3.22 (dd,  $J = 34.9, 15.5$  Hz, 1H), 3.10 – 3.03 (m, 1H), 3.00 (s, 3H), 1.85 (s, 3H);  $^{13}\text{C}$  NMR (100 MHz,  $\text{CDCl}_3$ )  $\delta$  172.9, 139.9, 137.5, 136.7, 134.8, 134.2, 133.4, 132.1, 131.5, 131.4, 130.0, 129.9, 129.7, 128.9, 128.2, 128.1, 127.9, 127.6, 127.2, 126.8, 126.6, 126.4, 124.9, 119.3, 112.3, 47.8, 45.2, 39.7 (t,  $J = 18.2$  Hz), 31.7, 26.9;  $^{19}\text{F}$  NMR (377 MHz,  $\text{CDCl}_3$ )  $\delta$  -81.00 (s, 3F), -108.91 – -110.13 (m, 1F), -111.11 – -112.46 (m, 1F), -123.53 – -125.42 (m, 2F), -125.86 (s, 2F); HRMS (ESI-TOF)  $m/z$ :  $[\text{M}+\text{Na}]^+$  Calcd. for  $\text{C}_{36}\text{H}_{26}\text{F}_9\text{NNaO}^+$  : 682.1763; found: 682.1761.

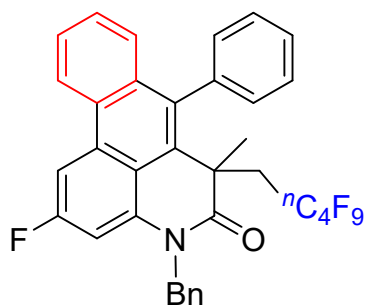

**4-benzyl-2-fluoro-6-methyl-6-(2,2,3,3,4,4,5,5,5-nonafluoropentyl)-7-phenyl-4H-**

**naphtho[3,2,1-*de*]quinolin-5(6*H*)-one (3ga).** The product was purified by column chromatography (petroleum ether / ethyl acetate = 20:1); White solid, 74.1 mg, 56% yield; mp 159.4-160.6 °C; <sup>1</sup>H NMR (400 MHz, CDCl<sub>3</sub>) δ 8.52 (d, *J* = 8.4 Hz, 1H), 8.04 (dd, *J* = 10.4, 2.1 Hz, 1H), 7.63 – 7.52 (m, 4H), 7.45 (d, *J* = 5.2 Hz, 1H), 7.41 (d, *J* = 8.0 Hz, 1H), 7.37 – 7.29 (m, 6H), 6.92 (d, *J* = 8.5 Hz, 2H), 5.39 (dd, *J* = 53.0, 15.7 Hz, 2H), 3.21 (dd, *J* = 34.6, 15.1 Hz, 1H), 3.11 – 2.94 (m, 1H), 1.88 (s, 3H); <sup>13</sup>C NMR (100 MHz, CDCl<sub>3</sub>) δ 173.5, 161.7 (d, *J* = 244.2 Hz), 139.6, 138.7, 138.6, 136.9, 135.9, 134.3, 133.5, 132.8, 132.7, 132.0, 129.5, 129.1, 128.8 (d, *J* = 4.2 Hz), 128.4, 128.2 (d, *J* = 23.6 Hz), 127.7, 127.6, 127.0, 126.6, 122.9, 114.7, 102.5 (d, *J* = 22.7 Hz), 102.1, 48.1, 45.3, 39.8 (t, *J* = 17.5 Hz), 31.9; <sup>19</sup>F NMR (377 MHz, CDCl<sub>3</sub>) δ -80.99 (s, 3F), -108.94 – -110.05 (m, 1F), -110.95 – -112.19 (m, 2F), -123.44 – -125.40 (m, 2F), -125.87 (d, *J* = 9.9 Hz, 2F); HRMS (ESI-TOF) *m/z*: [M+Na]<sup>+</sup> Calcd. for C<sub>35</sub>H<sub>23</sub>F<sub>10</sub>NNaO<sup>+</sup> : 686.1512; found: 686.1521.

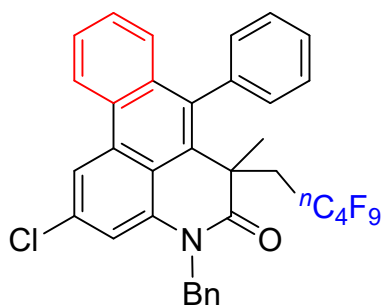

**4-benzyl-2-chloro-6-methyl-6-(2,2,3,3,4,4,5,5,5-nonafluoropentyl)-7-phenyl-4H-**

**naphtho[3,2,1-*de*]quinolin-5(6*H*)-one (3ha).** The product was purified by column chromatography (petroleum ether / ethyl acetate = 20:1); White solid, 88.7 mg, 65% yield; mp 160.6-161.8 °C; <sup>1</sup>H NMR (400 MHz, CDCl<sub>3</sub>) δ 8.58 (d, *J* = 8.4 Hz, 1H), 8.39 (d, *J* = 1.7 Hz, 1H), 7.60 (t, *J* = 7.6 Hz, 1H), 7.54 (t, *J* = 5.3 Hz, 3H), 7.45 (s, 1H), 7.40 (t, 1H), 7.34 (m, 5H), 7.30 – 7.27 (m, 1H), 7.13 (d, *J* = 1.7 Hz, 1H), 6.92 (d, *J* = 8.4 Hz, 1H), 5.39 (dd, *J* = 51.9, 16.0 Hz, 2H), 3.20 (dd, *J* = 34.5, 15.2

Hz, 1H), 3.08 – 2.90 (m, 1H), 1.87 (s, 3H);  $^{13}\text{C}$  NMR (100 MHz,  $\text{CDCl}_3$ )  $\delta$  173.4, 139.5, 138.0, 137.8, 135.9, 134.3, 133.5, 133.4, 132.1, 131.9, 129.4, 129.1, 128.41, 128.35, 128.3, 128.0, 127.7, 127.6, 127.2, 126.7, 122.8, 117.3, 116.3, 113.0, 48.0, 45.2, 39.8 (t,  $J = 18.7$  Hz), 31.9;  $^{19}\text{F}$  NMR (377 MHz,  $\text{CDCl}_3$ )  $\delta$  -80.99 (s, 3F), -108.18 – -110.12 (m, 1F), -110.60 – -112.31 (m, 1F), -123.32 – -125.35 (m, 2F), -125.87 (d,  $J = 12.5$  Hz, 2F); HRMS (ESI-TOF)  $m/z$ :  $[\text{M}+\text{Na}]^+$  Calcd. for  $\text{C}_{35}\text{H}_{23}\text{ClF}_9\text{NNaO}^+$  : 702.1217; found: 702.1216.

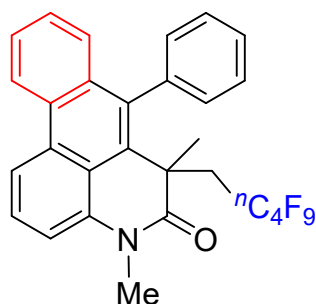

**4,6-dimethyl-6-(2,2,3,3,4,4,5,5,5-nonafluoropentyl)-7-phenyl-4H-naphtho[3,2,1-*de*]quinolin-5(6H)-one (3ia).** The product was purified by column chromatography (petroleum ether / ethyl acetate = 10:1); White solid, 83.5 mg, 73% yield; mp 204.5-205.7 °C;  $^1\text{H}$  NMR (400 MHz,  $\text{CDCl}_3$ )  $\delta$  8.69 (d,  $J = 8.3$  Hz, 1H), 8.49 (d,  $J = 8.3$  Hz, 1H), 7.66 (t,  $J = 8.1$  Hz, 1H), 7.61 – 7.56 (m, 1H), 7.54 – 7.49 (m, 3H), 7.42 – 7.38 (m, 1H), 7.37 – 7.34 (m, 2H), 7.23 (d,  $J = 8.1$  Hz, 1H), 6.92 (d,  $J = 8.4$  Hz, 1H), 3.59 (s, 3H), 3.12 (dd,  $J = 35.1, 15.1$  Hz, 1H), 3.03 – 2.87 (m, 1H), 1.79 (s, 3H);  $^{13}\text{C}$  NMR (100 MHz,  $\text{CDCl}_3$ )  $\delta$  172.8, 139.9, 137.7, 137.3, 134.0, 133.5, 131.8, 130.9, 130.0, 129.2, 128.21, 128.17, 127.9, 127.6, 127.4, 127.1, 126.9, 122.8, 117.9, 117.7, 111.3, 44.9, 40.0 (t,  $J = 18.2$  Hz), 31.4, 31.1;  $^{19}\text{F}$  NMR (377 MHz,  $\text{CDCl}_3$ )  $\delta$  -81.02 (s, 3F), -109.41 – -110.92 (m, 1F), -112.33 – -113.79 (m, 1F), -124.43 (s, 2F), -125.57 – -126.80 (m, 2F); HRMS (ESI-TOF)  $m/z$ :  $[\text{M}+\text{Na}]^+$  Calcd. for  $\text{C}_{29}\text{H}_{20}\text{F}_9\text{NNaO}^+$  : 592.1293; found: 592.1300.

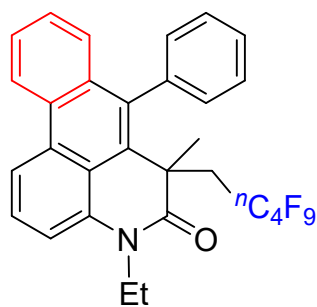

**4-ethyl-6-methyl-6-(2,2,3,3,4,4,5,5,5-nonafluoropentyl)-7-phenyl-2,6-dihydro-1H-**

**naphtho[3,2,1-*de*]quinolin-5(4*H*)-one (3ja).** The product was purified by column chromatography (petroleum ether / ethyl acetate = 20:1); White solid, 71.0 mg, 61% yield; mp 164.1-165.3 °C; <sup>1</sup>H NMR (400 MHz, CDCl<sub>3</sub>) δ 8.70 (d, *J* = 8.3 Hz, 1H), 8.48 (d, *J* = 8.3 Hz, 1H), 7.68 (t, *J* = 8.2 Hz, 1H), 7.62 – 7.56 (m, 1H), 7.51 (m, 3H), 7.43 – 7.33 (m, 3H), 7.25 (s, 1H), 6.90 (d, *J* = 8.4 Hz, 1H), 4.51 – 4.32 (m, 1H), 4.10 – 3.95 (m, 1H), 3.11 (dd, *J* = 35.0, 15.2 Hz, 1H), 3.01 – 2.86 (m, 1H), 1.79 (s, 3H), 1.37 (t, *J* = 7.1 Hz, 3H); <sup>13</sup>C NMR (100 MHz, CDCl<sub>3</sub>) δ 172.1, 140.0, 137.6, 135.9, 134.0, 133.5, 131.8, 131.2, 130.1, 129.2, 128.2, 127.9, 127.5, 127.4, 127.0, 126.8, 122.8, 117.7, 111.2, 44.8, 40.1 (t, *J* = 17.7 Hz), 38.6, 31.4, 11.5; <sup>19</sup>F NMR (377 MHz, CDCl<sub>3</sub>) δ -81.04 (s, 3F), -109.55 – -110.57 (m, 1F), -111.84 – -113.01 (m, 1F), -124.30 – -124.63 (m, 2F), -125.89 (s, 2F); HRMS (ESI-TOF) *m/z*: [M+Na]<sup>+</sup> Calcd. for C<sub>30</sub>H<sub>22</sub>F<sub>9</sub>NNaO<sup>+</sup> : 606.1450; found: 606.1456.

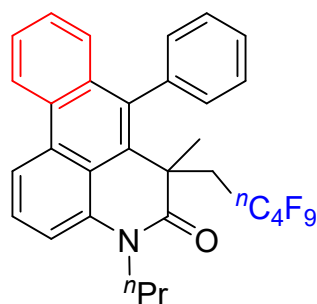

**6-methyl-6-(2,2,3,3,4,4,5,5,5-nonafluoropentyl)-7-phenyl-4-propyl-2,6-dihydro-1H-**

**naphtho[3,2,1-*de*]quinolin-5(4*H*)-one (3ka).** The product was purified by column chromatography (petroleum ether / ethyl acetate = 20:1); White solid, 75.6mg, 63% yield; mp 120.8-122.0 °C; <sup>1</sup>H NMR (400 MHz, CDCl<sub>3</sub>) δ 8.70 (d, *J* = 8.3 Hz, 1H), 8.48 (d, *J* = 8.3 Hz, 1H), 7.67 (t, *J* = 8.2 Hz, 1H), 7.62 – 7.56 (m, 1H), 7.54 – 7.48 (m, 3H), 7.43 – 7.38 (m, 1H), 7.38 – 7.34 (m, 2H), 7.21 (d, *J* = 7.9 Hz, 1H), 6.90 (d, *J* = 8.0 Hz, 1H), 4.28 – 4.12 (m, 1H), 4.04 – 3.91 (m, 1H), 3.12 (dd, *J* = 34.9, 15.1 Hz, 1H), 3.02 – 2.86 (m, 1H), 1.87 – 1.71 (m, 5H), 1.07 (t, *J* = 7.4 Hz, 3H); <sup>13</sup>C NMR (100

MHz, CDCl<sub>3</sub>)  $\delta$  172.3, 140.0, 137.6, 136.2, 134.0, 133.5, 131.9, 131.2, 130.1, 129.2, 128.2, 128.1, 127.9, 127.5, 127.4, 127.0, 126.8, 122.8, 117.9, 117.7, 111.4, 45.3, 44.9, 40.0 (t,  $J$  = 18.1 Hz), 31.5, 19.4, 11.5.; <sup>19</sup>F NMR (377 MHz, CDCl<sub>3</sub>)  $\delta$  -81.02 (s, 3F), -109.27 – -110.71 (m, 1F), -111.63 – -113.30 (m, 1F), -124.16 – -124.96 (m, 2F), -125.91 (d,  $J$  = 12.4 Hz, 2F); HRMS (ESI-TOF)  $m/z$ : [M+Na]<sup>+</sup> Calcd. for C<sub>31</sub>H<sub>24</sub>F<sub>9</sub>NNaO<sup>+</sup> : 620.1606; found: 620.1610.

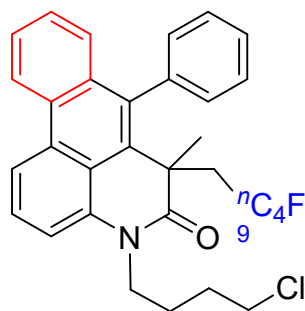

**4-(4-chlorobutyl)-6-methyl-6-(2,2,3,3,4,4,5,5,5-nonafluoropentyl)-7-phenyl-2,6-dihydro-1H-naphtho[3,2,1-*de*]quinolin-5(4H)-one (31a).** The product was purified by column chromatography (petroleum ether / ethyl acetate = 20:1); Yellow oil, 83.5 mg, 65% yield; <sup>1</sup>H NMR (400 MHz, CDCl<sub>3</sub>)  $\delta$  8.70 (d,  $J$  = 8.4 Hz, 1H), 8.50 (d,  $J$  = 8.5 Hz, 1H), 7.68 (t,  $J$  = 8.1 Hz, 1H), 7.60 (dd,  $J$  = 8.1, 7.1 Hz, 1H), 7.56 – 7.50 (m, 3H), 7.46 – 7.39 (m, 1H), 7.39 – 7.33 (m, 2H), 7.24 (d,  $J$  = 8.0 Hz, 1H), 6.92 (d,  $J$  = 8.5 Hz, 1H), 4.45 – 3.91 (m, 2H), 3.65 (d,  $J$  = 2.7 Hz, 2H), 3.12 (dd,  $J$  = 34.7, 14.6 Hz, 1H), 3.04 – 2.86 (m, 1H), 1.97 (d,  $J$  = 5.5 Hz, 4H), 1.80 (s, 3H); <sup>13</sup>C NMR (100 MHz, CDCl<sub>3</sub>)  $\delta$  172.5, 139.9, 137.7, 136.0, 134.0, 133.5, 131.9, 131.3, 129.8, 129.2, 128.21, 128.16, 127.9, 127.6, 127.4, 127.1, 126.9, 122.8, 117.9, 111.3, 44.9, 44.6, 42.8, 40.0 (t,  $J$  = 17.7 Hz), 31.5, 30.1, 23.7; <sup>19</sup>F NMR (377 MHz, CDCl<sub>3</sub>)  $\delta$  -81.02 (s, 3F), -109.04 – -110.70 (m, 1F), -111.61 – -113.35 (m, 1F), -124.01 – -124.95 (m, 2F), -125.89 (s, 2F); HRMS (ESI-TOF)  $m/z$ : [M+Na]<sup>+</sup> Calcd. for C<sub>32</sub>H<sub>25</sub>ClF<sub>9</sub>NNaO<sup>+</sup> : 668.1373; found: 668.1382.

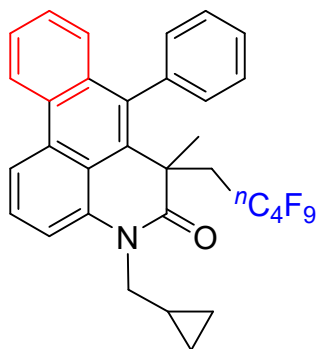

**4-(cyclopropylmethyl)-6-methyl-6-(2,2,3,3,4,4,5,5,5-nonafluoropentyl)-7-phenyl-2,6-dihydro-1H-naphtho[3,2,1-de]quinolin-5(4H)-one (3ma).** The product was purified by column chromatography (petroleum ether / ethyl acetate = 20:1); White solid, 69.7 mg, 57% yield; mp 148.6-149.8 °C;  $^1\text{H}$  NMR (400 MHz,  $\text{CDCl}_3$ )  $\delta$  8.70 (d,  $J = 8.3$  Hz, 1H), 8.49 (d,  $J = 8.3$  Hz, 1H), 7.69 (t,  $J = 8.2$  Hz, 1H), 7.62 – 7.56 (m, 1H), 7.54 – 7.50 (m, 3H), 7.42 (d,  $J = 7.9$  Hz, 2H), 7.39 – 7.33 (m, 2H), 6.90 (d,  $J = 8.4$  Hz, 1H), 4.24 – 4.00 (m, 2H), 3.13 (dd,  $J = 35.0, 15.2$  Hz, 1H), 3.02 – 2.86 (m, 1H), 1.79 (s, 3H), 1.35 – 1.28 (m, 1H), 0.62 – 0.41 (m, 4H);  $^{13}\text{C}$  NMR (100 MHz,  $\text{CDCl}_3$ )  $\delta$  172.7, 140.0, 137.6, 136.5, 134.0, 133.5, 131.9, 131.2, 130.1, 129.2, 128.2, 128.1, 127.9, 127.5, 127.3, 127.0, 126.8, 122.8, 117.7, 111.8, 47.2, 45.0, 40.0 (t,  $J = 18.5$  Hz), 31.5, 9.0, 4.3, 3.8;  $^{19}\text{F}$  NMR (377 MHz,  $\text{CDCl}_3$ )  $\delta$  -81.03 (s), -109.20 – -110.30 (m), -111.30 – -112.62 (m), -123.56 – -125.55 (m), -125.90 (s); HRMS (ESI-TOF)  $m/z$ :  $[\text{M}+\text{Na}]^+$  Calcd. for  $\text{C}_{32}\text{H}_{24}\text{F}_9\text{NNaO}^+$  : 632.1606; found: 632.1614.

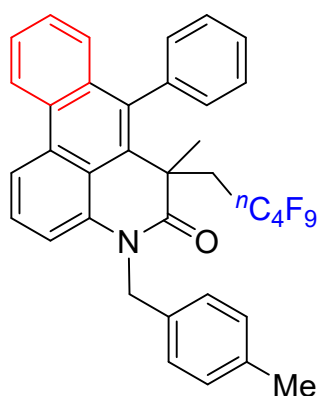

**4-(3,5-dimethoxyphenyl)-1,3-dimethyl-3-(2,2,3,3,4,4,5,5,5-nonafluoropentyl)cyclopenta[de]quinoline-2,5(1H,3H)-dione (3na).** The product was purified by column chromatography (petroleum ether / ethyl acetate = 20:1); White solid, 83.5 mg, 63% yield; mp 209.7-210.9 °C;  $^1\text{H}$  NMR (400 MHz,  $\text{CDCl}_3$ )  $\delta$  8.68 (d,  $J = 8.3$  Hz, 1H), 8.45 (d,  $J = 8.4$  Hz,

1H), 7.62 – 7.56 (m, 2H), 7.55 – 7.51 (m, 3H), 7.51 – 7.48 (m, 1H), 7.38 (t,  $J = 7.3$  Hz, 2H), 7.23 (d,  $J = 7.9$  Hz, 2H), 7.19 – 7.12 (m, 3H), 6.93 (d,  $J = 8.5$  Hz, 1H), 5.50 – 5.33 (m, 2H), 3.25 (dd,  $J = 34.7, 15.3$  Hz, 1H), 3.13 – 2.87 (m, 1H), 2.33 (s, 3H), 1.90 (s, 3H);  $^{13}\text{C}$  NMR (100 MHz,  $\text{CDCl}_3$ )  $\delta$  173.2, 139.9, 137.7, 136.9, 136.4, 134.0, 133.53, 133.46, 132.0, 131.0, 129.8, 129.6, 129.2, 128.23, 128.17, 127.9, 127.6, 127.3, 127.0, 126.9, 126.5, 122.8, 117.9, 117.8, 112.7, 47.6, 45.3, 39.7 (t,  $J = 17.8$  Hz), 31.9, 21.2;  $^{19}\text{F}$  NMR (377 MHz,  $\text{CDCl}_3$ )  $\delta$  -80.99 (t,  $J = 9.4$  Hz, 3F), -108.77 – -110.08 (m, 1F), -110.89 – -112.39 (m, 1F), -123.29 – -125.43 (m, 2F), -125.86 (dd,  $J = 26.1, 12.0$  Hz, 2F); HRMS (ESI-TOF)  $m/z$ :  $[\text{M}+\text{Na}]^+$  Calcd. for  $\text{C}_{36}\text{H}_{26}\text{F}_9\text{NNaO}^+$  : 682.1763; found: 682.1769.

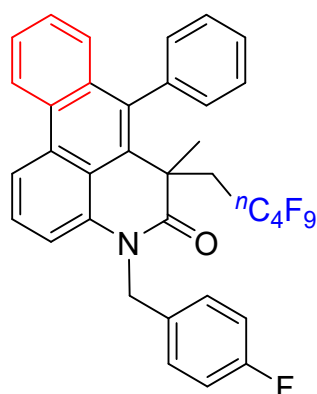

**4-(4-fluorobenzyl)-6-methyl-6-(2,2,3,3,4,4,5,5,5-nonafluoropentyl)-7-phenyl-2,6-dihydro-1H-naphtho[3,2,1-de]quinolin-5(4H)-one (30a).** The product was purified by column chromatography (petroleum ether / ethyl acetate = 20:1); White solid, 85.7 mg, 65% yield; mp 100.1-101.3 °C  $^1\text{H}$  NMR (400 MHz,  $\text{CDCl}_3$ )  $\delta$  8.69 (d,  $J = 8.3$  Hz, 1H), 8.47 (d,  $J = 8.3$  Hz, 1H), 7.63 – 7.57 (m, 2H), 7.57 – 7.54 (m, 3H), 7.52 – 7.48 (m, 1H), 7.43 – 7.36 (m, 2H), 7.32 (dd,  $J = 8.5, 5.3$  Hz, 2H), 7.13 (d,  $J = 7.8$  Hz, 1H), 7.03 (t,  $J = 8.7$  Hz, 2H), 6.95 (d,  $J = 8.3$  Hz, 1H), 5.40 (s, 2H), 3.25 (dd,  $J = 34.7, 15.2$  Hz, 1H), 3.14 – 2.97 (m, 1H), 1.91 (s, 3H);  $^{13}\text{C}$  NMR (100 MHz,  $\text{CDCl}_3$ )  $\delta$  173.3, 162.1 (d,  $J = 245.3$  Hz), 139.8, 137.9, 136.2, 134.0, 133.4, 132.29, 132.26, 131.9 (d,  $J = 3.3$  Hz), 131.1, 129.6, 129.2, 128.3, 128.2 (d,  $J = 8.7$  Hz), 128.0, 127.6, 127.3, 127.1, 127.0, 122.8, 118.1, 117.8, 115.8 (d,  $J = 21.6$  Hz), 112.4, 47.3, 45.3, 39.7 (t,  $J = 18.0$  Hz), 31.9;  $^{19}\text{F}$  NMR (377 MHz,  $\text{CDCl}_3$ )  $\delta$  -80.99 (t,  $J = 8.4$  Hz, 3F), -109.37 (d,  $J = 273.3$  Hz, 1F), -111.59 (d,  $J = 273.4$  Hz, 1F), -115.52 (d,  $J = 4.1$  Hz, 1F), -123.24 – -125.56 (m, 2F), -125.86 (d,  $J = 12.4$  Hz, 2F); HRMS (ESI-TOF)  $m/z$ :  $[\text{M}+\text{Na}]^+$  Calcd. for  $\text{C}_{35}\text{H}_{23}\text{F}_{10}\text{NNaO}^+$  : 686.1512; found: 686.1519.



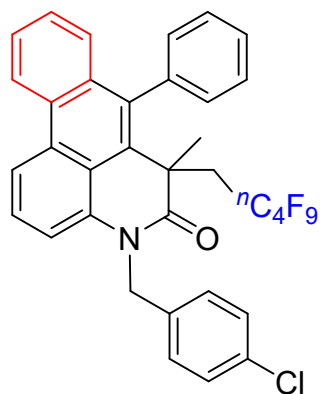

**4-(4-chlorobenzyl)-6-methyl-6-(2,2,3,3,4,4,5,5,5-nonafluoropentyl)-7-phenyl-2,6-dihydro-1H-naphtho[3,2,1-*de*]quinolin-5(4H)-one (3pa).** The product was purified by column chromatography (petroleum ether / ethyl acetate = 20:1); White solid, 84.7 mg, 62% yield; mp 123.8-125.0 °C; <sup>1</sup>H NMR (400 MHz, CDCl<sub>3</sub>) δ 8.69 (d, *J* = 8.4 Hz, 1H), 8.47 (d, *J* = 8.5 Hz, 1H), 7.61 (t, *J* = 7.7 Hz, 1H), 7.57 – 7.53 (m, 4H), 7.48 (d, *J* = 6.1 Hz, 1H), 7.42 – 7.35 (m, 2H), 7.33 – 7.26 (m, 4H), 7.08 (d, *J* = 7.9 Hz, 1H), 6.94 (d, *J* = 8.5 Hz, 1H), 5.39 (s, 2H), 3.23 (dd, *J* = 34.6, 15.2 Hz, 1H), 3.13 – 2.94 (m, 1H), 1.89 (s, 3H); <sup>13</sup>C NMR (100 MHz, CDCl<sub>3</sub>) δ 173.4, 139.8, 137.9, 136.1, 135.2, 134.0, 133.4, 133.1, 132.0, 131.1, 129.6, 129.2, 129.1, 128.3, 128.2, 128.03, 127.97, 127.6, 127.3, 127.2, 127.0, 122.8, 118.2, 117.8, 112.4, 47.3, 45.3, 39.7 (t, *J* = 17.4 Hz), 31.9; <sup>19</sup>F NMR (377 MHz, CDCl<sub>3</sub>) δ -80.98 (s, 3F), -108.69 – -110.15 (m, 1F), -110.96 – -112.41 (m, 1F), -123.27 – -125.52 (m, 2F), -125.86 (d, *J* = 9.4 Hz, 2F); HRMS (ESI-TOF) *m/z*: [M+H]<sup>+</sup> Calcd. for C<sub>35</sub>H<sub>23</sub>ClF<sub>9</sub>NNaO<sup>+</sup> : 702.1217; found: 702.1224.

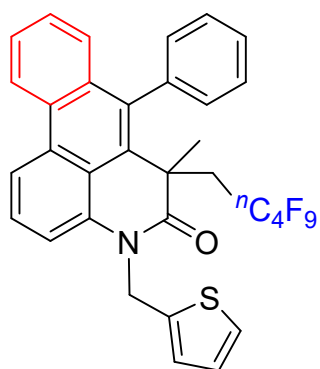

**6-methyl-6-(2,2,3,3,4,4,5,5,5-nonafluoropentyl)-7-phenyl-4-(thiophen-2-ylmethyl)-2,6-dihydro-1H-naphtho[3,2,1-*de*]quinolin-5(4H)-one (3qa).** The product was purified by column chromatography (petroleum ether / ethyl acetate = 10:1); White solid, 70.0 mg, 54% yield; mp 133.2-134.4 °C; <sup>1</sup>H NMR (400 MHz, CDCl<sub>3</sub>) δ 8.68 (d, *J* = 8.4 Hz, 1H), 8.48 (d, *J* = 8.4 Hz, 1H),

7.61 (dd,  $J = 16.5, 8.3$  Hz, 2H), 7.54 (t,  $J = 6.6$  Hz, 3H), 7.46 (d,  $J = 5.8$  Hz, 1H), 7.42 – 7.32 (m, 3H), 7.22 (d,  $J = 5.0$  Hz, 1H), 7.13 (d,  $J = 3.1$  Hz, 1H), 6.98 – 6.94 (m, 1H), 6.92 (d,  $J = 8.5$  Hz, 1H), 5.54 (dd,  $J = 43.9, 15.6$  Hz, 2H), 3.21 (dd,  $J = 34.6, 15.1$  Hz, 1H), 3.08 – 2.90 (m, 1H), 1.86 (s, 3H);  $^{13}\text{C}$  NMR (100 MHz,  $\text{CDCl}_3$ )  $\delta$  172.8, 139.8, 139.2, 137.8, 136.0, 134.0, 133.4, 131.9, 131.2, 129.6, 129.2, 128.24, 128.16, 127.9, 127.6, 127.3, 127.1, 126.9, 126.8, 126.2, 125.2, 122.8, 118.1, 117.9, 111.9, 45.2, 43.2, 39.7 (t,  $J = 18.0$  Hz), 31.6;  $^{19}\text{F}$  NMR (377 MHz,  $\text{CDCl}_3$ )  $\delta$  -80.97 (d,  $J = 1.6$  Hz, 3F), -108.87 – -110.56 (m, 1F), -110.87 – -112.39 (m, 1F), -123.54 – -125.55 (m, 2F), -125.84 (s, 2F); HRMS (ESI-TOF)  $m/z$ :  $[\text{M}+\text{Na}]^+$  Calcd. for  $\text{C}_{33}\text{H}_{22}\text{F}_9\text{NNaOS}^+$  : 674.1171; found: 674.1180.

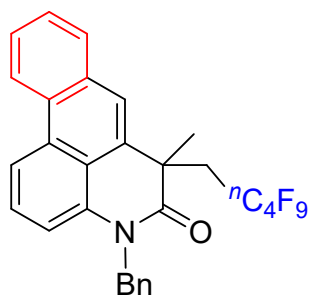

**4-benzyl-6-methyl-6-(2,2,3,3,4,4,5,5,5-nonafluoropentyl)-4H-naphtho[3,2,1-de]quinolin-5(6H)-one (3sa).** The product was purified by column chromatography (petroleum ether / ethyl acetate = 20:1); Yellow oil, 47.1 mg, 41% yield;  $^1\text{H}$  NMR (400 MHz,  $\text{CDCl}_3$ )  $\delta$  8.68 – 8.59 (m, 1H), 8.38 (d,  $J = 8.4$  Hz, 1H), 7.90 (dd,  $J = 6.4, 2.8$  Hz, 1H), 7.77 (s, 1H), 7.70 – 7.60 (m, 2H), 7.51 (t,  $J = 8.1$  Hz, 1H), 7.34 – 7.28 (m, 5H), 7.10 (d,  $J = 7.9$  Hz, 1H), 5.45 (s, 2H), 3.75 (dd,  $J = 32.4, 15.6$  Hz, 1H), 3.14 – 2.85 (m, 1H), 1.87 (s, 3H);  $^{13}\text{C}$  NMR (100 MHz,  $\text{CDCl}_3$ )  $\delta$  171.8, 136.6, 136.0, 133.1, 131.8, 131.0, 129.2, 129.0, 128.4, 127.5, 127.3, 127.1, 126.5, 124.4, 123.2, 118.0, 117.2, 112.2, 47.0, 44.2, 40.9 (t,  $J = 19.5$  Hz), 34.8;  $^{19}\text{F}$  NMR (377 MHz,  $\text{CDCl}_3$ )  $\delta$  -81.03 (t,  $J = 9.1$  Hz, 3F), -105.44 (d,  $J = 281.2$  Hz, 1F), -111.37 (d,  $J = 272.8$  Hz, 1F), -123.18 – -125.35 (m, 2F), -125.54 – -126.27 (m, 2F); HRMS (ESI-TOF)  $m/z$ :  $[\text{M}+\text{H}]^+$  Calcd. for  $\text{C}_{29}\text{H}_{21}\text{F}_9\text{NO}^+$  : 570.1474; found: 570.1470.

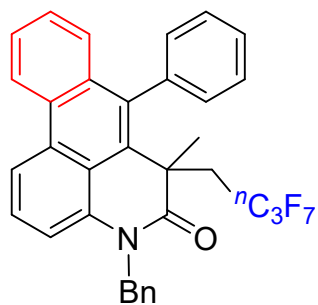

**4-benzyl-6-(2,2,3,3,4,4,4-heptafluorobutyl)-6-methyl-7-phenyl-2,6-dihydro-1H-**

**naphtho[3,2,1-*de*]quinolin-5(4H)-one (4a).** The product was purified by column chromatography (petroleum ether / ethyl acetate = 30:1); White solid, 76.7 mg, 64% yield; mp 190.1-191.3 °C; <sup>1</sup>H NMR (400 MHz, CDCl<sub>3</sub>) δ 8.68 (d, *J* = 8.4 Hz, 1H), 8.45 (d, *J* = 8.4 Hz, 1H), 7.57 (m, 5H), 7.50 – 7.45 (m, 1H), 7.38 (t, *J* = 7.3 Hz, 2H), 7.33 (d, *J* = 4.3 Hz, 4H), 7.29 – 7.25 (m, 1H), 7.15 (d, *J* = 7.9 Hz, 1H), 6.93 (d, *J* = 8.4 Hz, 1H), 5.43 (dd, *J* = 61.7, 15.2 Hz, 2H), 3.23 (dd, *J* = 34.7, 15.2 Hz, 1H), 3.10 – 2.92 (m, 1H), 1.90 (s, 3H); <sup>13</sup>C NMR (100 MHz, CDCl<sub>3</sub>) δ 173.3, 139.9, 137.8, 136.6, 136.3, 134.0, 133.5, 132.0, 131.1, 129.8, 129.2, 128.9, 128.3, 128.2, 127.9, 127.6, 127.32, 127.28, 127.1, 126.9, 126.6, 122.8, 118.0, 117.8, 112.6, 47.9, 45.3, 39.6 (t, *J* = 17.5 Hz), 31.9; <sup>19</sup>F NMR (377 MHz, CDCl<sub>3</sub>) δ -80.26 (d, *J* = 1.4 Hz, 3F), -108.92 – -110.96 (m, 1F), -111.69 – -114.62 (m, 1F), -126.11 – -129.95 (m, 2F); HRMS (ESI-TOF) *m/z*: [M+Na]<sup>+</sup> Calcd. for C<sub>34</sub>H<sub>24</sub>F<sub>7</sub>NNaO<sup>+</sup> : 618.1638; found: 618.1646.

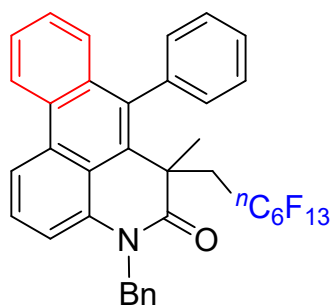

**4-benzyl-6-methyl-7-phenyl-6-(2,2,3,3,4,4,5,5,6,6,7,7,7-tridecafluoroheptyl)-2,6-dihydro-1H-**

**naphtho[3,2,1-*de*]quinolin-5(4H)-one (4b).** The product was purified by column chromatography (petroleum ether / ethyl acetate = 40:1); White solid, 100.5 mg, 67% yield; mp 208.7-209.9 °C; <sup>1</sup>H NMR (400 MHz, CDCl<sub>3</sub>) δ 8.69 (d, *J* = 8.4 Hz, 1H), 8.46 (d, *J* = 8.4 Hz, 1H), 7.63 – 7.56 (m, 3H), 7.55 – 7.50 (m, 3H), 7.39 (t, *J* = 7.5 Hz, 2H), 7.35 (d, *J* = 4.3 Hz, 4H), 7.30 – 7.27 (m, 1H), 7.17 (d, *J* = 7.9 Hz, 1H), 6.96 (d, *J* = 8.5 Hz, 1H), 5.46 (dd, *J* = 47.0, 15.4 Hz, 2H), 3.28 (dd, *J* = 34.8, 15.1

Hz, 1H), 3.15 – 2.95 (m, 1H), 1.92 (s, 3H);  $^{13}\text{C}$  NMR (100 MHz,  $\text{CDCl}_3$ )  $\delta$  173.3, 139.9, 137.8, 136.6, 136.4, 134.0, 133.5, 132.0, 131.1, 129.8, 129.3, 128.9, 128.3, 128.2, 127.9, 127.6, 127.32, 127.28, 127.1, 126.9, 126.6, 122.8, 118.0, 117.9, 112.6, 47.9, 45.3, 39.8 (t,  $J = 18.0$  Hz), 31.9;  $^{19}\text{F}$  NMR (377 MHz,  $\text{CDCl}_3$ )  $\delta$  -80.80 (t,  $J = 9.3$  Hz, 3F), -108.59 – -109.77 (m, 1F), -110.62 – -111.90 (m, 1F), -121.69 (s, 2F), -122.77 (s, 2F), -123.30 – -123.74 (m, 2F), -126.12 (s, 2F); HRMS (ESI-TOF)  $m/z$ :  $[\text{M}+\text{Na}]^+$  Calcd. for  $\text{C}_{34}\text{H}_{24}\text{F}_{13}\text{NNaO}^+$  : 768.1543; found: 768.1552.

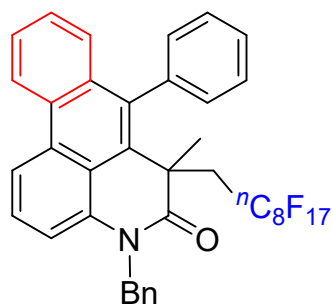

**4-benzyl-6-(2,2,3,3,4,4,5,5,6,6,7,7,8,8,9,9,9-heptafluorononyl)-6-methyl-7-phenyl-2,6-dihydro-1H-naphtho[3,2,1-de]quinolin-5(4H)-one (4c).** The product was purified by column chromatography (petroleum ether / ethyl acetate = 30:1); White solid, 110.4 mg, 65% yield; mp 221.5-222.7 °C;  $^1\text{H}$  NMR (400 MHz,  $\text{CDCl}_3$ )  $\delta$  8.68 (d,  $J = 8.3$  Hz, 1H), 8.45 (d,  $J = 8.3$  Hz, 1H), 7.62 – 7.57 (m, 1H), 7.56 – 7.51 (m, 4H), 7.51 – 7.46 (m, 1H), 7.41 – 7.35 (m, 2H), 7.33 (d,  $J = 4.4$  Hz, 4H), 7.26 – 7.23 (m, 1H), 7.14 (d,  $J = 7.8$  Hz, 1H), 6.92 (d,  $J = 8.0$  Hz, 1H), 5.43 (dd,  $J = 46.0$ , 15.1 Hz, 2H), 3.24 (dd,  $J = 34.7$ , 15.1 Hz, 1H), 3.10 – 2.89 (m, 1H), 1.89 (s, 3H);  $^{13}\text{C}$  NMR (100 MHz,  $\text{CDCl}_3$ )  $\delta$  173.3, 139.9, 137.8, 136.6, 136.4, 134.0, 133.5, 132.0, 131.1, 129.8, 129.3, 128.9, 128.3, 128.2, 127.9, 127.6, 127.33, 127.28, 127.1, 126.9, 126.6, 122.8, 118.0, 117.8, 112.6, 47.9, 45.3, 39.8 (t,  $J = 14.7$  Hz), 31.9;  $^{19}\text{F}$  NMR (377 MHz,  $\text{CDCl}_3$ )  $\delta$  -80.76 (d,  $J = 8.2$  Hz, 3F), -108.55 – -110.01 (m, 1F), -110.66 – -112.27 (m, 1F), -121.30 – -122.10 (m, 6F), -122.70 (s, 2F), -123.31 – -123.75 (m, 2F), -126.07 (s, 2F); HRMS (ESI-TOF)  $m/z$ :  $[\text{M}+\text{Na}]^+$  Calcd. for  $\text{C}_{39}\text{H}_{24}\text{F}_{17}\text{NNaO}^+$  : 868.1479; found: 868.1487.

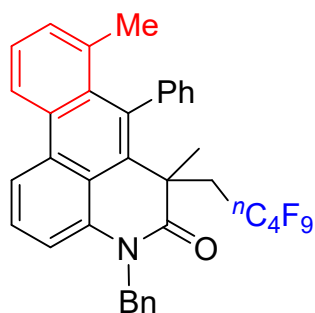

**4-benzyl-6,8-dimethyl-6-(2,2,3,3,4,4,5,5,5-nonafluoropentyl)-7-phenyl-2,6-dihydro-1H-naphtho[3,2,1-*de*]quinolin-5(4H)-one (5ab)**<sup>3</sup>. The product was purified by column chromatography (petroleum ether / ethyl acetate = 30:1); White solid, 81.4 mg, 62% yield; mp 176.4-177.6 °C; <sup>1</sup>H NMR (400 MHz, CDCl<sub>3</sub>) δ 8.60 (d, *J* = 8.3 Hz, 1H), 8.39 (d, *J* = 8.4 Hz, 1H), 7.54 – 7.47 (m, 3H), 7.47 – 7.40 (m, 4H), 7.35 – 7.30 (m, 4H), 7.27 (d, *J* = 3.4 Hz, 1H), 7.25 – 7.22 (m, 1H), 7.10 (d, *J* = 7.8 Hz, 1H), 5.40 (q, *J* = 16.3 Hz, 2H), 3.28 – 3.02 (m, 1H), 2.90 – 2.70 (m, 1H), 1.79 (s, 3H), 1.67 (s, 3H); <sup>13</sup>C NMR (100 MHz, CDCl<sub>3</sub>) δ 173.9, 141.6, 138.6, 137.1, 136.6, 135.8, 135.3, 133.5, 132.9, 131.6, 131.0, 130.7, 128.9, 128.6, 127.5, 127.3, 127.2, 126.9, 126.6, 122.1, 118.8, 117.8, 112.3, 48.0, 46.2, 39.9 (t, *J* = 17.9 Hz), 32.3, 25.5; <sup>19</sup>F NMR (377 MHz, CDCl<sub>3</sub>) δ -81.02 (s, 3F), -109.42 – -110.78 (m, 1F), -111.08 – -112.51 (m, 1F), -123.38 – -125.43 (m, 2F), -125.86 (d, *J* = 7.2 Hz, 2F); HRMS (ESI-TOF) *m/z*: [M+Na]<sup>+</sup> Calcd. for C<sub>36</sub>H<sub>26</sub>F<sub>9</sub>NNaO<sup>+</sup>: 682.1763; found: 682.1771.

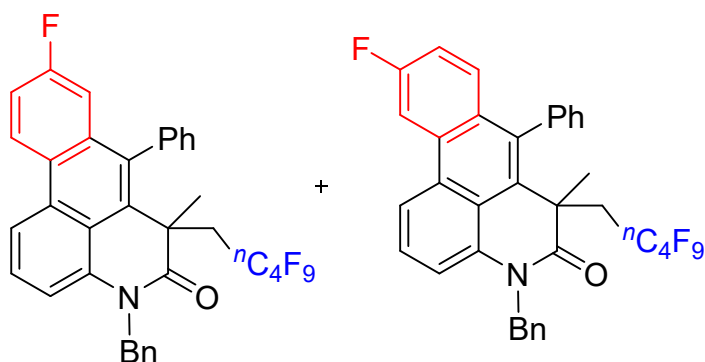

**4-benzyl-9-fluoro-6-methyl-6-(2,2,3,3,4,4,5,5,5-nonafluoropentyl)-7-phenyl-2,6-dihydro-1H-naphtho[3,2,1-*de*]quinolin-5(4H)-one and 4-benzyl-10-fluoro-6-methyl-6-(2,2,3,3,4,4,5,5,5-nonafluoropentyl)-7-phenyl-2,6-dihydro-1H-naphtho[3,2,1-*de*]quinolin-5(4H)-one (5ac and 5ac')**<sup>4,5</sup>. The product was purified by column chromatography (petroleum ether / ethyl acetate = 20:1); White solid, 72.1 mg (5ac:5ac' = 4:1), 54% yield; mp 158.1-159.3 °C; <sup>1</sup>H NMR (400 MHz,

CDCl<sub>3</sub>)  $\delta$  8.65 (dd,  $J$  = 9.2, 5.6 Hz, 0.2H), 8.35 (d,  $J$  = 8.5 Hz, 0.2H), 8.32 – 8.23 (m, 1.6H), 7.58 – 7.51 (m, 4H), 7.47 (d,  $J$  = 6.0 Hz, 1H), 7.37 – 7.31 (m, 5H), 7.29 – 7.24 (m, 1H), 7.16 (dd,  $J$  = 9.4, 5.0 Hz, 1H), 7.14 – 7.09 (m, 1H), 6.92 (dd,  $J$  = 9.3, 5.9 Hz, 0.8H), 6.54 (dd,  $J$  = 11.6, 2.6 Hz, 0.2H), 5.43 (dd,  $J$  = 45.5, 15.1 Hz, 2H), 3.24 (dd,  $J$  = 34.6, 15.2 Hz, 1H), 3.11 – 2.89 (m, 1H), 1.89 (s, 3H); <sup>13</sup>C NMR (100 MHz, CDCl<sub>3</sub>)  $\delta$  173.2, 161.7 (d,  $J$  = 247.0 Hz), 139.7, 136.5, 136.4, 133.4, 133.3, 131.8, 130.8, 130.4 (d,  $J$  = 4.3 Hz), 130.2 (d,  $J$  = 8.7 Hz), 129.0, 128.6, 128.4, 128.3, 128.2, 128.0, 127.8, 127.4 (d,  $J$  = 8.9 Hz), 126.5, 125.4, 125.3, 118.3, 118.1, 117.8, 116.1 (d,  $J$  = 23.5 Hz), 113.2, 112.5, 112.1, 111.9, 107.7 (d,  $J$  = 22.6 Hz), 47.9, 45.2, 39.7 (t,  $J$  = 17.9 Hz), 31.9; <sup>19</sup>F NMR (377 MHz, CDCl<sub>3</sub>)  $\delta$  -80.99 (s, 3F), -108.89 – -110.20 (m, 1F), -110.91 – -112.27 (m, 1F), -112.75 – -113.03 (m, 0.2F), -113.59 (d,  $J$  = 3.9 Hz, 0.8F), -123.32 – -125.59 (m, 2F), -125.85 (d,  $J$  = 13.1 Hz, 2F); HRMS (ESI-TOF)  $m/z$ : [M+Na]<sup>+</sup> Calcd. for C<sub>35</sub>H<sub>23</sub>F<sub>10</sub>NNaO<sup>+</sup>: 686.1512; found: 686.1520.

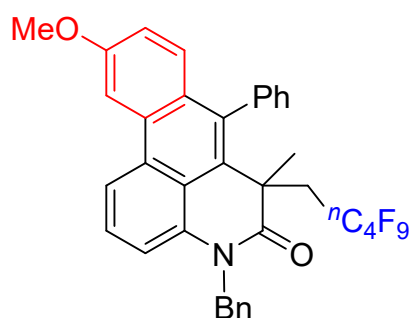

**4-benzyl-10-methoxy-6-methyl-6-(2,2,3,3,4,4,5,5,5-nonafluoropentyl)-7-phenyl-2,6-dihydro-1H-naphtho[3,2,1-de]quinolin-5(4H)-one (5ad)**<sup>5</sup>. The product was purified by column chromatography (petroleum ether / ethyl acetate = 10:1); White solid, 98.8 mg, 73% yield; mp 207.6-208.8 °C; <sup>1</sup>H NMR (400 MHz, CDCl<sub>3</sub>)  $\delta$  8.58 (d,  $J$  = 9.2 Hz, 1H), 8.33 (d,  $J$  = 8.4 Hz, 1H), 7.58 – 7.51 (m, 3H), 7.48 (m, 2H), 7.39 – 7.35 (m, 1H), 7.32 (d,  $J$  = 4.4 Hz, 4H), 7.25 – 7.20 (m, 2H), 7.07 (d,  $J$  = 7.8 Hz, 1H), 6.24 (d,  $J$  = 2.6 Hz, 1H), 5.56 – 5.28 (m, 2H), 3.58 (s, 3H), 3.23 (dd,  $J$  = 34.7, 15.4 Hz, 1H), 3.10 – 2.93 (m, 1H), 1.89 (s, 3H); <sup>13</sup>C NMR (100 MHz, CDCl<sub>3</sub>)  $\delta$  173.3, 158.4, 140.1, 137.2, 136.7, 136.4, 135.6, 133.4, 132.0, 131.1, 130.3, 128.9, 128.3, 128.1, 127.4, 127.2, 126.6, 124.5, 123.8, 117.5, 117.2, 116.8, 111.7, 108.2, 55.0, 47.8, 45.3, 39.7 (t,  $J$  = 18.6 Hz), 31.9; <sup>19</sup>F NMR (377 MHz, CDCl<sub>3</sub>)  $\delta$  -81.00 (s, 3F), -108.88 – -110.09 (m, 1F), -111.04 – -112.40 (m, 1F), -123.44 – -125.38 (m, 2F), -125.87 (d,  $J$  = 10.7 Hz, 2F); HRMS (ESI-TOF)  $m/z$ : [M+Na]<sup>+</sup> Calcd. for C<sub>36</sub>H<sub>26</sub>F<sub>9</sub>NNaO<sub>2</sub><sup>+</sup>: 698.1712; found: 698.1719.

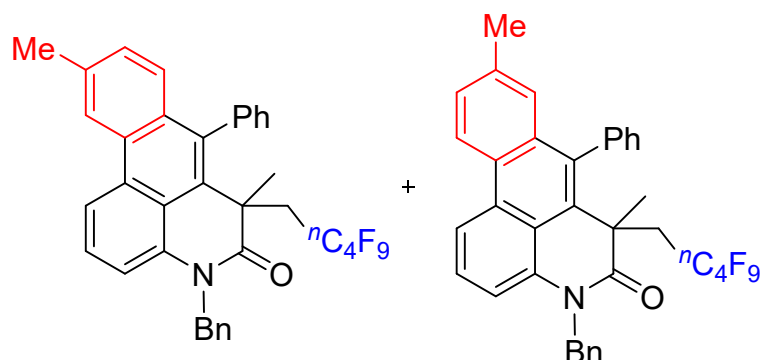

**4-benzyl-6,10-dimethyl-6-(2,2,3,3,4,4,5,5,5-nonafluoropentyl)-7-phenyl-2,6-dihydro-1H-naphtho[3,2,1-*de*]quinolin-5(4H)-one** and **4-benzyl-6,9-dimethyl-6-(2,2,3,3,4,4,5,5,5-nonafluoropentyl)-7-phenyl-2,6-dihydro-1H-naphtho[3,2,1-*de*]quinolin-5(4H)-one (5ae and 5ae')**<sup>3,5</sup>. The product was purified by column chromatography (petroleum ether / ethyl acetate = 20:1); White solid, 76.7 mg (5ae:5ae' = 1:1), 58% yield; mp 183.1-184.3 °C; <sup>1</sup>H NMR (400 MHz, CDCl<sub>3</sub>) δ 8.49 (d, *J* = 8.6 Hz, 0.5H), 8.40 (s, 0.5H), 8.37 (d, *J* = 8.4 Hz, 0.5H), 8.33 (d, *J* = 8.3 Hz, 0.5H), 7.52 – 7.39 (m, 6H), 7.37 – 7.30 (m, 1H), 7.30 – 7.27 (m, 3H), 7.23 – 7.12 (m, 2H), 7.05 (t, *J* = 8.0 Hz, 1H), 6.76 (d, *J* = 8.6 Hz, 0.5H), 6.62 (s, 0.5H), 5.36 (dd, *J* = 40.9, 15.0 Hz, 2H), 3.18 (dd, *J* = 34.7, 15.1 Hz, 1H), 3.03 – 2.87 (m, 1H), 2.49 (s, 1.5H), 2.25 (s, 1.5H), 1.83 (s, 3H); <sup>13</sup>C NMR (100 MHz, CDCl<sub>3</sub>) δ 173.3, 140.1, 139.9, 137.7, 137.5, 136.8, 136.74, 136.68, 136.3, 134.1, 133.5, 133.4, 132.0, 131.9, 131.1, 130.7, 129.7, 129.3, 128.9, 128.75, 128.68, 128.20, 128.16, 128.1, 127.9, 127.5, 127.25, 127.22, 127.1, 126.6, 122.8, 122.5, 118.01, 117.96, 117.8, 117.5, 112.5, 112.2, 47.9, 47.8, 45.33, 45.25, 39.8 (t, *J* = 17.4 Hz), 31.93, 31.90, 21.9; <sup>19</sup>F NMR (377 MHz, CDCl<sub>3</sub>) δ -80.99 (s, 3F), -109.52 (d, *J* = 272.3 Hz, 1F), -110.92 – -112.41 (m, 1F), -123.40 – -125.42 (m, 2F), -125.85 (s, 2F); HRMS (ESI-TOF) *m/z*: [M+Na]<sup>+</sup> Calcd. for C<sub>36</sub>H<sub>26</sub>F<sub>9</sub>NNaO<sup>+</sup>: 682.1763; found: 682.1771.

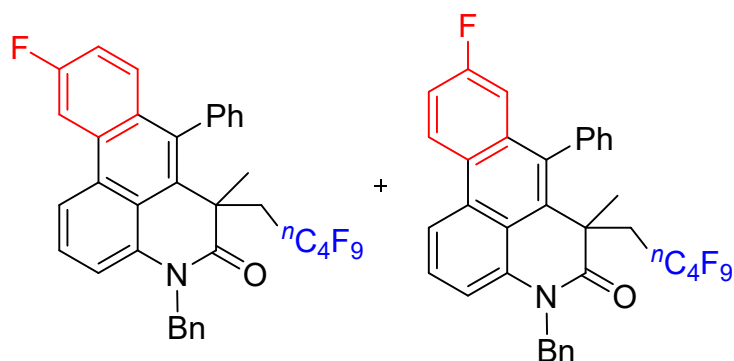

**4-benzyl-10-fluoro-6-methyl-6-(2,2,3,3,4,4,5,5,5-nonafluoropentyl)-7-phenyl-2,6-dihydro-1H-naphtho[3,2,1-*de*]quinolin-5(4H)-one** and **4-benzyl-9-fluoro-6-methyl-6-(2,2,3,3,4,4,5,5,5-nonafluoropentyl)-7-phenyl-2,6-dihydro-1H-naphtho[3,2,1-*de*]quinolin-5(4H)-one** (**5ac'** and **5ac**)<sup>4,5</sup>. The product was purified by column chromatography (petroleum ether / ethyl acetate = 20:1); White solid, 86.8 mg (5af:5af' = 5.7:1), 65% yield; mp 151.8-153.0 °C; <sup>1</sup>H NMR (400 MHz, CDCl<sub>3</sub>) δ 8.65 (dd, *J* = 9.2, 5.7 Hz, 0.85H), 8.35 (d, *J* = 8.4 Hz, 0.85H), 8.29 – 8.20 (m, 0.3H), 7.58 – 7.51 (m, 4H), 7.45 (d, *J* = 6.1 Hz, 1H), 7.38 – 7.30 (m, 7H), 7.13 (d, *J* = 7.9 Hz, 1H), 6.94 – 6.87 (m, 0.15H), 6.53 (dd, *J* = 11.6, 2.6 Hz, 0.85H), 5.66 – 5.11 (m, 2H), 3.24 (dd, *J* = 34.9, 15.5 Hz, 1H), 3.08 – 2.91 (m, 1H), 1.88 (d, *J* = 2.4 Hz, 3H); <sup>13</sup>C NMR (100 MHz, CDCl<sub>3</sub>) δ 173.1, 161.6 (d, *J* = 246.1 Hz), 139.4, 136.5, 135.7 (d, *J* = 8.2 Hz), 133.3, 131.8, 131.2, 130.8, 129.0, 128.6, 128.4, 128.2, 127.8, 127.3, 126.5, 125.9, 125.3 (d, *J* = 8.7 Hz), 118.1, 117.8, 117.4, 116.1 (d, *J* = 23.9 Hz), 113.2, 112.5, 112.0 (d, *J* = 22.9 Hz), 47.9, 45.3, 39.7 (t, *J* = 17.9 Hz), 31.8; <sup>19</sup>F NMR (377 MHz, CDCl<sub>3</sub>) δ -80.99 (s, 3F), -108.73 – -110.19 (m, 1F), -111.07 – -112.55 (m, 1F), -112.91 (d, *J* = 4.6 Hz, 0.85F), -113.62 (s, 0.15F), -123.33 – -125.55 (m, 2F), -125.87 (d, *J* = 12.1 Hz, 2F); HRMS (ESI-TOF) *m/z*: [M+Na]<sup>+</sup> Calcd. for C<sub>35</sub>H<sub>23</sub>F<sub>10</sub>NNaO<sup>+</sup>: 644.0866; found: 644.0875.

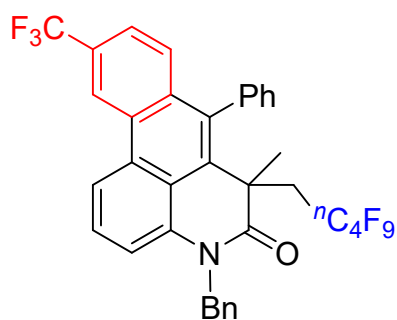

**4-benzyl-6-methyl-6-(2,2,3,3,4,4,5,5,5-nonafluoropentyl)-7-phenyl-10-(trifluoromethyl)-2,6-dihydro-1H-naphtho[3,2,1-*de*]quinolin-5(4H)-one** (**5ag**)<sup>4</sup>. The product was purified by column



chromatography (petroleum ether / ethyl acetate = 10:1); White solid, 76.7 mg, 54% yield; mp 152.4-153.6 °C; <sup>1</sup>H NMR (400 MHz, CDCl<sub>3</sub>) δ 8.77 (d, *J* = 8.8 Hz, 1H), 8.45 (d, *J* = 8.3 Hz, 1H), 7.77 (dd, *J* = 8.7, 1.5 Hz, 1H), 7.60 – 7.54 (m, 4H), 7.47 (d, *J* = 4.8 Hz, 1H), 7.37 – 7.32 (m, 5H), 7.29 – 7.27 (m, 1H), 7.23 – 7.18 (m, 2H), 5.52 – 5.34 (m, 2H), 3.26 (dd, *J* = 34.9, 15.3 Hz, 1H), 3.10 – 2.92 (m, 1H), 1.90 (s, 3H); <sup>13</sup>C NMR (100 MHz, CDCl<sub>3</sub>) δ 173.1, 138.8, 137.7, 136.6, 136.3, 133.5, 133.3, 131.8 (d, *J* = 3.5 Hz), 131.4 (d, *J* = 32.9 Hz), 130.4, 129.0, 128.8, 128.5, 128.2, 127.9, 127.4, 125.2 (d, *J* = 264.9 Hz), 124.8 (d, *J* = 4.5 Hz), 122.72, 122.70, 118.6, 118.3, 113.6, 47.9, 45.4, 39.7 (t, *J* = 17.6 Hz), 31.9; <sup>19</sup>F NMR (377 MHz, CDCl<sub>3</sub>) δ -62.50 (s, 3F), -80.98 (s, 3F), -108.43 – -110.16 (m, 1F), -110.63 – -112.58 (m, 1F), -123.67 – -124.97 (m, 2F), -125.85 (s, 2F); HRMS (ESI-TOF) *m/z*: [M+Na]<sup>+</sup> Calcd. for C<sub>36</sub>H<sub>23</sub>F<sub>12</sub>NNaO<sup>+</sup>: 736.1480; found: 736.1488.

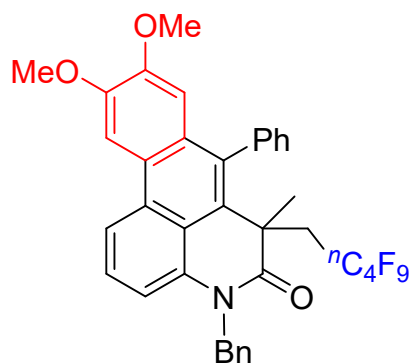

**4-benzyl-9,10-dimethoxy-6-methyl-6-(2,2,3,3,4,4,5,5,5-nonfluoropentyl)-7-phenyl-2,6-dihydro-1H-naphtho[3,2,1-de]quinolin-5(4H)-one (5ah).** The product was purified by column chromatography (petroleum ether / ethyl acetate = 5:1); White solid, 87.3 mg, 62% yield; mp 189.3-190.5 °C; <sup>1</sup>H NMR (400 MHz, CDCl<sub>3</sub>) δ 8.28 (d, *J* = 8.4 Hz, 1H), 7.98 (s, 1H), 7.60 – 7.57 (m, 1H), 7.56 – 7.52 (m, 3H), 7.48 (t, *J* = 8.1 Hz, 1H), 7.41 – 7.38 (m, 1H), 7.35 (d, *J* = 4.9 Hz, 4H), 7.32 – 7.26 (m, 1H), 7.09 (d, *J* = 7.9 Hz, 1H), 6.26 (s, 1H), 5.45 (dd, *J* = 40.5, 14.5 Hz, 2H), 4.09 (s, 3H), 3.58 (s, 3H), 3.28 (dd, *J* = 34.7, 15.1 Hz, 1H), 3.13 – 2.91 (m, 1H), 1.93 (s, 3H); <sup>13</sup>C NMR (100 MHz, CDCl<sub>3</sub>) δ 173.3, 149.6, 149.4, 140.4, 136.9, 136.7, 136.4, 133.3, 131.80, 131.77, 130.3, 129.4, 128.9, 128.21, 128.18, 128.0, 127.8, 127.2, 126.8, 126.5, 124.3, 117.5, 117.3, 111.5, 107.6, 103.0, 56.0, 55.2, 47.8, 45.2, 39.7 (t, *J* = 17.9 Hz), 32.0; <sup>19</sup>F NMR (377 MHz, CDCl<sub>3</sub>) δ -80.98 (t, *J* = 9.0 Hz, 3F), -109.58 (dd, *J* = 273.2, 32.4 Hz, 1F), -110.87 – -112.63 (m, 1F), -123.08 – -125.33 (m, 2F), -125.82 (dd, *J* = 26.6, 13.1 Hz, 2F); HRMS (ESI-TOF) *m/z*: [M+Na]<sup>+</sup> Calcd. for C<sub>37</sub>H<sub>22</sub>F<sub>9</sub>NNaO<sub>3</sub><sup>+</sup>: 728.1818; found: 728.1823.

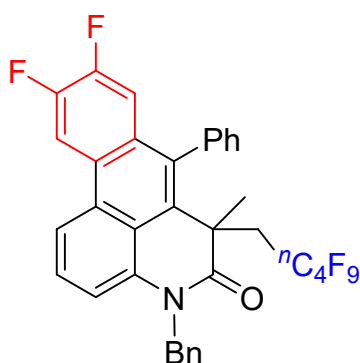

**4-benzyl-9,10-difluoro-6-methyl-6-(2,2,3,3,4,4,5,5,5-nonafluoropentyl)-7-phenyl-2,6-dihydro-1H-naphtho[3,2,1-*de*]quinolin-5(4H)-one (5ai).** The product was purified by column chromatography (petroleum ether / ethyl acetate = 20:1); White solid, 79.5 mg, 58% yield; mp 147.1-148.3 °C; <sup>1</sup>H NMR (400 MHz, CDCl<sub>3</sub>) δ 8.36 (dd, *J* = 12.2, 8.0 Hz, 1H), 8.18 (d, *J* = 8.3 Hz, 1H), 7.61 – 7.55 (m, 3H), 7.52 (t, *J* = 8.1 Hz, 1H), 7.46 (d, *J* = 6.2 Hz, 1H), 7.37 – 7.32 (m, 5H), 7.29 – 7.26 (m, 1H), 7.16 (d, *J* = 7.9 Hz, 1H), 6.67 (dd, *J* = 12.9, 8.4 Hz, 1H), 5.44 (dd, *J* = 46.5, 15.2 Hz, 2H), 3.26 (dd, *J* = 34.9, 15.3 Hz, 1H), 3.09 – 2.86 (m, 1H), 1.89 (s, 3H); <sup>13</sup>C NMR (100 MHz, CDCl<sub>3</sub>) δ 173.1, 150.3 (dd, *J* = 250.1, 14.4 Hz), 150.0 (dd, *J* = 248.7, 13.7 Hz), 139.2, 136.7, 136.5, 136.4, 133.2, 131.7 (d, *J* = 3.3 Hz), 131.53, 131.48, 130.6, 130.1 (d, *J* = 3.5 Hz), 129.0, 128.8, 128.5, 128.3, 127.8, 127.4, 126.5, 117.9, 117.8, 114.7 (d, *J* = 18.7 Hz), 112.9, 110.4 (d, *J* = 18.3 Hz), 47.9, 45.3, 39.7 (t, *J* = 17.7 Hz), 31.8; <sup>19</sup>F NMR (377 MHz, CDCl<sub>3</sub>) δ -80.99 (s, 3F), -108.53 – -110.27 (m, 1F), -110.79 – -112.59 (m, 1F), -123.34 – -125.40 (m, 2F), -125.85 (d, *J* = 11.5 Hz, 2F), -135.98 (dd, *J* = 18.8, 10.6 Hz, 1F), -136.43 – -136.87 (m, 1F); HRMS (ESI-TOF) *m/z*: [M+Na]<sup>+</sup> Calcd. for C<sub>35</sub>H<sub>22</sub>F<sub>11</sub>NNaO<sup>+</sup>: 704.1418; found: 704.1426.

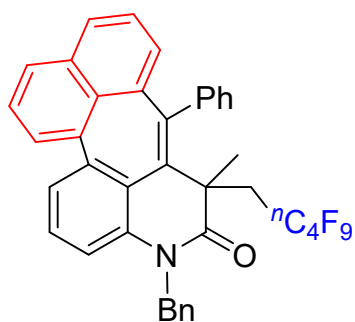

**4-benzyl-6-methyl-6-(2,2,3,3,4,4,5,5,5-nonafluoropentyl)-7-phenyl-2,4-dihydro-1H-naphtho[1',8':4,5,6]cyclohepta[1,2,3-*de*]quinolin-5(6H)-one (6aj).** The product was purified by

column chromatography (petroleum ether / ethyl acetate = 15:1); White oil, 72.6 mg, 52% yield;  $^1\text{H}$  NMR (400 MHz,  $\text{CDCl}_3$ )  $\delta$  7.71 (d,  $J = 7.9$  Hz, 1H), 7.60 (d,  $J = 7.0$  Hz, 1H), 7.57 – 7.50 (m, 2H), 7.40 – 7.32 (m, 4H), 7.31 – 7.26 (m, 3H), 7.25 – 7.22 (m, 2H), 7.22 – 7.15 (m, 1H), 7.10 (t,  $J = 7.7$  Hz, 1H), 6.97 (d,  $J = 8.1$  Hz, 1H), 6.73 (d,  $J = 7.4$  Hz, 1H), 6.67 (d,  $J = 7.9$  Hz, 1H), 6.52 (d,  $J = 7.3$  Hz, 1H), 5.46 (d,  $J = 16.3$  Hz, 1H), 5.10 (d,  $J = 16.3$  Hz, 1H), 2.71 (dd,  $J = 35.5, 15.1$  Hz, 1H), 2.18 – 1.97 (m, 1H), 1.00 (s, 3H);  $^{13}\text{C}$  NMR (100 MHz,  $\text{CDCl}_3$ )  $\delta$  171.6, 147.9, 145.2, 141.9, 139.6, 137.7, 137.24, 137.17, 132.8, 132.7, 131.3, 131.2, 130.5, 129.3, 129.1, 129.0, 128.7, 128.0, 127.8, 127.61, 127.59, 127.55, 127.47, 126.50, 126.3, 124.8, 114.3, 48.1, 47.5, 38.7 (t,  $J = 19.6$  Hz), 21.1;  $^{19}\text{F}$  NMR (377 MHz,  $\text{CDCl}_3$ )  $\delta$  -81.58 (s, 3F), -106.97 – -108.23 (m, 1F), -112.86 – -114.32 (m, 1F), -125.43 – -126.17 (m, 2F), -126.34 (s, 2F); HRMS (ESI-TOF)  $m/z$ :  $[\text{M}+\text{Na}]^+$  Calcd. for  $\text{C}_{39}\text{H}_{26}\text{F}_9\text{NNaO}^+$ : 718.1763; found: 718.1771.

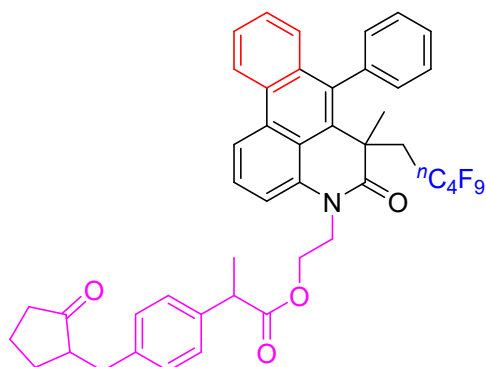

**2-(6-methyl-6-(2,2,3,3,4,4,5,5,5-nonafluoropentyl)-5-oxo-7-phenyl-5,6-dihydro-4H-naphtho[3,2,1-de]quinolin-4-yl)ethyl 2-(4-((2-oxocyclopentyl)methyl)phenyl)propanoate (7a).**

The product was purified by column chromatography (petroleum ether / ethyl acetate = 3:1); White solid, 79.7 mg, 48% yield; mp 78.3-79.5 °C;  $^1\text{H}$  NMR (400 MHz,  $\text{CDCl}_3$ )  $\delta$  8.70 (d,  $J = 8.4$  Hz, 1H), 8.50 (d,  $J = 8.4$  Hz, 1H), 7.67 – 7.56 (m, 2H), 7.52 (m, 3H), 7.39 (dd,  $J = 15.0, 7.7$  Hz, 4H), 7.18 (d,  $J = 7.9$  Hz, 2H), 7.08 (d,  $J = 7.9$  Hz, 2H), 6.91 (d,  $J = 8.5$  Hz, 1H), 4.58 – 4.27 (m, 4H), 3.76 – 3.61 (m, 1H), 3.21 – 2.84 (m, 3H), 2.51 – 2.41 (m, 1H), 2.32 (m, 2H), 2.17 – 2.01 (m, 2H), 1.98 – 1.87 (m, 1H), 1.77 (s, 3H), 1.75 – 1.67 (m, 1H), 1.57 – 1.50 (m, 1H), 1.47 (t,  $J = 7.0$  Hz, 3H);  $^{13}\text{C}$  NMR (100 MHz,  $\text{CDCl}_3$ )  $\delta$  220.2, 174.9, 172.8, 139.8, 139.1, 138.2, 137.8, 136.2, 136.1, 133.9, 133.4, 131.8, 131.2, 129.6, 129.3, 129.2, 128.23, 128.16, 127.9, 127.65, 127.56, 127.5, 127.1, 127.0, 122.8, 118.1, 117.8, 111.6, 111.5, 60.7, 51.1, 51.0, 45.2, 44.9, 42.0, 41.8, 40.1 (t,  $J = 17.9$  Hz), 38.3, 35.3, 31.4, 29.4, 20.6, 18.5;  $^{19}\text{F}$  NMR (377 MHz,  $\text{CDCl}_3$ )  $\delta$  -80.99 (s, 3F), -109.51 – -110.74 (m,

1F), -111.64 – -113.63 (m, 1F), -124.52 (s, 2F), -125.86 (d,  $J = 30.3$  Hz, 2F); HRMS (ESI-TOF)  $m/z$ :  $[M+Na]^+$  Calcd. for  $C_{45}H_{38}F_9NNaO_4^+$ : 850.2549; found: 850.2557.

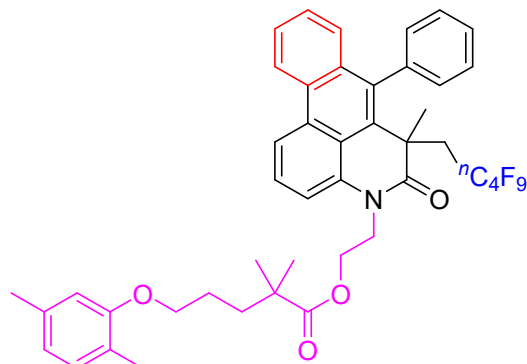

**2-(6-methyl-6-(2,2,3,3,4,4,5,5,5-nonafluoropentyl)-5-oxo-7-phenyl-5,6-dihydro-4H-naphtho[3,2,1-de]quinolin-4-yl)ethyl 5-(2,5-dimethylphenoxy)-2,2-dimethylpentanoate (7b).**

The product was purified by column chromatography (petroleum ether / ethyl acetate = 10:1); White solid, 103.6 mg, 62% yield; mp 107.6-109.8 °C;  $^1H$  NMR (400 MHz,  $CDCl_3$ )  $\delta$  8.70 (d,  $J = 8.4$  Hz, 1H), 8.51 (d,  $J = 8.4$  Hz, 1H), 7.71 (t,  $J = 8.1$  Hz, 1H), 7.61 (t,  $J = 7.5$  Hz, 1H), 7.57 – 7.50 (m, 4H), 7.44 – 7.37 (m, 2H), 7.33 (d,  $J = 6.9$  Hz, 1H), 7.00 (d,  $J = 7.4$  Hz, 1H), 6.93 (d,  $J = 8.4$  Hz, 1H), 6.65 (d,  $J = 7.4$  Hz, 1H), 6.55 (s, 1H), 4.65 – 4.31 (m, 4H), 4.06 – 3.49 (m, 2H), 3.28 – 2.70 (m, 2H), 2.28 (s, 3H), 2.18 (s, 3H), 1.82 (s, 3H), 1.72 (s, 4H), 1.23 (d,  $J = 2.4$  Hz, 6H);  $^{13}C$  NMR (100 MHz,  $CDCl_3$ )  $\delta$  178.1, 172.7, 157.0, 139.9, 137.8, 136.6, 136.2, 134.0, 133.4, 131.8, 131.2, 130.4, 129.6, 129.2, 128.2, 128.1, 127.9, 127.6, 127.5, 127.1, 127.0, 123.7, 122.8, 120.8, 118.2, 117.8, 112.0, 111.7, 67.9, 60.6, 44.9, 42.3, 42.0, 40.1 (t,  $J = 17.7$  Hz), 37.2, 31.4, 25.3, 25.2, 21.5, 15.9;  $^{19}F$  NMR (377 MHz,  $CDCl_3$ )  $\delta$  -80.97 (s, 3F), -109.06 – -111.27 (m, 1F), -111.45 – -113.99 (m, 1F), -124.47 (s, 2F), -125.40 – -126.53 (m, 2F); HRMS (ESI-TOF)  $m/z$ :  $[M+Na]^+$  Calcd. for  $C_{45}H_{42}F_9NNaO_4^+$ : 854.2862; found: 854.2869.

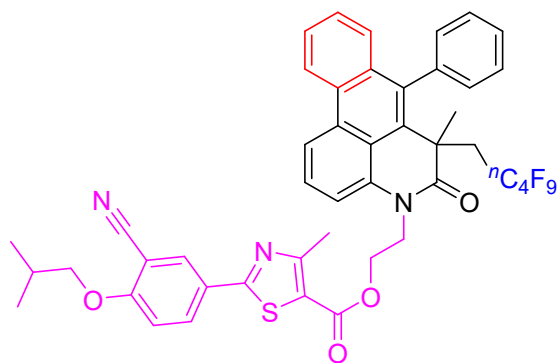

**2-(6-methyl-6-(2,2,3,3,4,4,5,5,5-nonafluoropentyl)-5-oxo-7-phenyl-5,6-dihydro-4H-naphtho[3,2,1-de]quinolin-4-yl)ethyl 2-(3-cyano-4-isobutoxyphenyl)-4-methylthiazole-5-carboxylate (7c).** The product was purified by column chromatography (petroleum ether / ethyl acetate = 5:1); White solid, 82.1 mg, 46% yield; mp 162.5-163.7 °C;  $^1\text{H}$  NMR (400 MHz,  $\text{CDCl}_3$ )  $\delta$  8.71 (d,  $J$  = 8.4 Hz, 1H), 8.52 (d,  $J$  = 8.4 Hz, 1H), 8.13 (d,  $J$  = 2.0 Hz, 1H), 8.02 (dd,  $J$  = 8.8, 2.0 Hz, 1H), 7.70 (t,  $J$  = 8.1 Hz, 1H), 7.61 (t,  $J$  = 7.6 Hz, 1H), 7.55 – 7.46 (m, 4H), 7.42 – 7.34 (m, 3H), 6.98 (d,  $J$  = 8.9 Hz, 1H), 6.91 (d,  $J$  = 8.5 Hz, 1H), 4.77 – 4.52 (m, 4H), 3.89 (d,  $J$  = 6.5 Hz, 2H), 3.25 – 2.86 (m, 2H), 2.73 (s, 3H), 2.30 – 2.14 (m, 1H), 1.80 (s, 3H), 1.09 (d,  $J$  = 6.7 Hz, 6H);  $^{13}\text{C}$  NMR (100 MHz,  $\text{CDCl}_3$ )  $\delta$  172.9, 167.7, 162.7, 162.1, 162.0, 139.8, 137.9, 136.2, 134.0, 133.4, 132.7, 132.2, 131.8, 131.3, 129.6, 129.2, 128.3, 128.2, 127.9, 127.6, 127.5, 127.2, 127.0, 126.1, 122.9, 121.2, 118.2, 117.9, 115.5, 112.8, 111.5, 103.2, 75.9, 61.3, 44.9, 42.0, 40.2 (t,  $J$  = 17.7 Hz), 31.4, 28.3, 19.2, 17.6;  $^{19}\text{F}$  NMR (377 MHz,  $\text{CDCl}_3$ )  $\delta$  -81.00 (s, 3F), -109.46 – -111.03 (m, 1F), -111.43 – -113.29 (m, 1F), -123.34 – -124.96 (m, 2F), -125.77 – -125.99 (m, 2F); HRMS (ESI-TOF)  $m/z$ :  $[\text{M}+\text{Na}]^+$  Calcd. for  $\text{C}_{46}\text{H}_{37}\text{F}_9\text{N}_3\text{O}_4\text{S}^+$ : 898.2356; found: 898.2365.

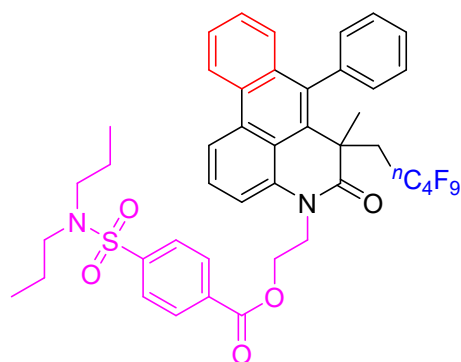

**2-(6-methyl-6-(2,2,3,3,4,4,5,5,5-nonafluoropentyl)-5-oxo-7-phenyl-5,6-dihydro-4H-naphtho[3,2,1-de]quinolin-4-yl)ethyl 4-(N,N-dipropylsulfamoyl)benzoate--methane (1/1) (7d).**

The product was purified by column chromatography (petroleum ether / ethyl acetate = 5:1); White

solid, 72.5 mg, 42% yield; mp 62.5-63.7 °C; <sup>1</sup>H NMR (400 MHz, CDCl<sub>3</sub>) δ 8.70 (d, *J* = 8.4 Hz, 1H), 8.52 (d, *J* = 8.4 Hz, 1H), 8.10 (d, *J* = 8.4 Hz, 2H), 7.84 (d, *J* = 8.4 Hz, 2H), 7.67 (t, *J* = 8.1 Hz, 1H), 7.61 (t, *J* = 7.6 Hz, 1H), 7.55 – 7.51 (m, 3H), 7.48 (d, *J* = 8.0 Hz, 1H), 7.42 – 7.33 (m, 3H), 6.92 (d, *J* = 8.4 Hz, 1H), 4.82 – 4.75 (m, 1H), 4.73 – 4.67 (m, 1H), 4.63 (t, *J* = 5.9 Hz, 2H), 3.15 – 3.05 (m, 5H), 3.05 – 2.90 (m, 1H), 1.80 (s, 3H), 1.54 (dd, *J* = 15.1, 7.5 Hz, 4H), 0.86 (t, *J* = 7.4 Hz, 6H); <sup>13</sup>C NMR (100 MHz, CDCl<sub>3</sub>) δ 172.9, 165.4, 144.5, 139.8, 137.9, 136.1, 133.9, 133.4, 133.1, 131.7, 131.3, 130.4, 129.5, 129.1, 128.2, 128.1, 127.9, 127.6, 127.3, 127.2, 127.1, 127.0, 122.8, 118.3, 117.8, 111.3, 61.7, 50.0, 44.9, 41.9, 40.2 (t, *J* = 18.1 Hz), 31.4, 22.0, 11.2; <sup>19</sup>F NMR (377 MHz, CDCl<sub>3</sub>) δ -81.03 (t, *J* = 9.4 Hz, 3F), -109.35 – -110.70 (m, 1F), -111.79 – -113.03 (m, 1F), -124.49 (s, 2F), -125.70 – -126.14 (m, 2F); HRMS (ESI-TOF) *m/z*: [M+Na]<sup>+</sup> Calcd. for C<sub>44</sub>H<sub>43</sub>F<sub>10</sub>N<sub>2</sub>NaO<sub>5</sub>S<sup>+</sup>: 905.2641; found: 905.2638.

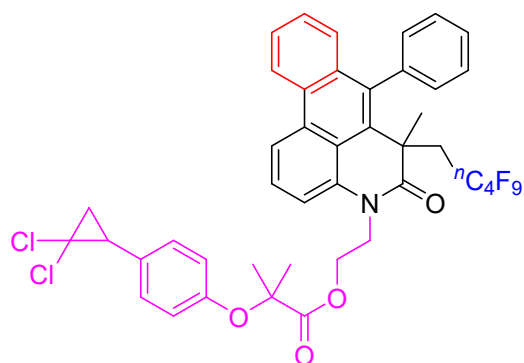

**2-(6-methyl-6-(2,2,3,3,4,4,5,5,5-nonafluoropentyl)-5-oxo-7-phenyl-5,6-dihydro-4H-naphtho[3,2,1-de]quinolin-4-yl)ethyl 2-(4-(2,2-dichlorocyclopropyl)phenoxy)-2-methylpropanoate (7e).** The product was purified by column chromatography (petroleum ether / ethyl acetate = 10:1); White solid, 99.6 mg, 57% yield; mp 168. °C; <sup>1</sup>H NMR (400 MHz, CDCl<sub>3</sub>) δ 8.70 (d, *J* = 8.3 Hz, 1H), 8.49 (d, *J* = 8.4 Hz, 1H), 7.66 – 7.59 (m, 2H), 7.55 – 7.50 (m, 3H), 7.41 – 7.38 (m, 3H), 7.37 – 7.33 (m, 1H), 7.11 – 6.98 (m, 2H), 6.92 (d, *J* = 8.5 Hz, 1H), 6.84 – 6.76 (m, 2H), 4.57 – 4.33 (m, 4H), 3.17 – 2.89 (m, 2H), 2.78 – 2.70 (m, 1H), 1.89 – 1.81 (m, 1H), 1.79 (s, 3H), 1.68 (dd, *J* = 16.0, 8.4 Hz, 1H), 1.58 (d, *J* = 11.5 Hz, 6H); <sup>13</sup>C NMR (100 MHz, CDCl<sub>3</sub>) δ 174.4, 172.8, 155.0, 139.8, 137.8, 136.0, 134.0, 133.4, 131.8, 131.2, 129.8, 129.7, 129.6, 129.2, 128.5, 128.4, 128.25, 128.17, 127.9, 127.6, 127.5, 127.2, 127.0, 122.8, 119.0, 118.9, 118.2, 117.7, 111.6, 79.3, 61.5, 60.9, 44.9, 41.8, 40.1 (t, *J* = 18.1 Hz), 34.9, 31.4, 25.9, 25.6, 25.4; <sup>19</sup>F NMR (377 MHz, CDCl<sub>3</sub>) δ -80.98 (s, 3F), -109.35 – -110.98 (m, 1F), -111.72 – -113.25 (m, 1F), -124.51 (s,

2F), -125.87 (d,  $J = 14.7$  Hz, 2F); HRMS (ESI-TOF)  $m/z$ :  $[M+Na]^+$  Calcd. for  $C_{43}H_{34}Cl_2F_9NNaO_4^+$ :  
892.1613; found: 892.1616.

## 5. X-ray crystal data for product **3pa** (CCDC: 2377733)

Bruker Apex2 CCD was used for the crystal measurement and the ellipsoid contour is shown at 30% probability levels. Single crystals of compound **3pa** were obtained by slow evaporation of its hexane/dichloromethane solution.

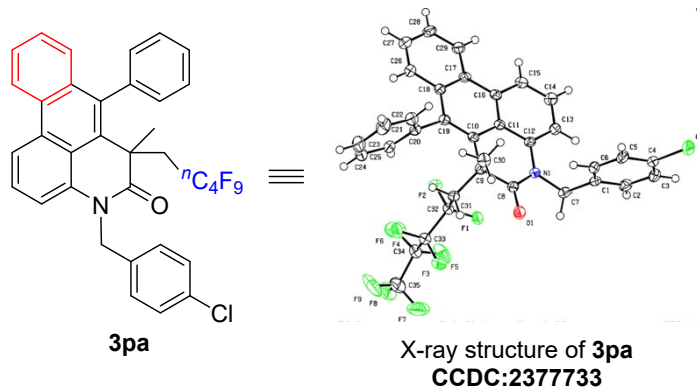

| Compound                           | <b>3pa</b>                                                    |
|------------------------------------|---------------------------------------------------------------|
| Empirical formula                  | C <sub>35</sub> H <sub>23</sub> ClF <sub>9</sub> NO           |
| Formula weight                     | 679.99                                                        |
| Temperature/K                      | 150                                                           |
| Crystal system                     | monoclinic                                                    |
| Space group                        | P2 <sub>1</sub>                                               |
| a/Å                                | 14.7922(7)                                                    |
| b/Å                                | 6.2915(3)                                                     |
| c/Å                                | 19.9389(10)                                                   |
| α/°                                | 90                                                            |
| β/°                                | 106.376(2)                                                    |
| γ/°                                | 90                                                            |
| Volume/Å <sup>3</sup>              | 1780.34(15)                                                   |
| Z                                  | 2                                                             |
| ρ <sub>calc</sub> /cm <sup>3</sup> | 1.268                                                         |
| μ/mm <sup>-1</sup>                 | 0.181                                                         |
| F(000)                             | 692.0                                                         |
| Crystal size/mm <sup>3</sup>       | 0.15 × 0.06 × 0.05                                            |
| Radiation                          | MoKα (λ = 0.71073)                                            |
| 2θ range for data collection/°     | 4.026 to 52.916                                               |
| Index ranges                       | -18 ≤ h ≤ 18, -7 ≤ k ≤ 7, -24 ≤ l ≤ 24                        |
| Reflections collected              | 21018                                                         |
| Independent reflections            | 6682 [R <sub>int</sub> = 0.0644, R <sub>sigma</sub> = 0.0669] |
| Data/restraints/parameters         | 6682/1/425                                                    |



|                                                |                                  |
|------------------------------------------------|----------------------------------|
| Goodness-of-fit on $F^2$                       | 1.033                            |
| Final R indexes [ $I \geq 2\sigma(I)$ ]        | $R_1 = 0.0442$ , $wR_2 = 0.1017$ |
| Final R indexes [all data]                     | $R_1 = 0.0581$ , $wR_2 = 0.1090$ |
| Largest diff. peak/hole / $e \text{ \AA}^{-3}$ | 0.21/-0.25                       |

---

## 6. References

1. Xu, R.-R.; Fang, X.; Qi, X.; Wu, X.-F. Convenient synthesis of thioester-substituted oxindoles by palladium-catalyzed thiocarbonylative cyclization with sulfonyl chlorides as the sulfur source. *Chin. J. Chem.* **2023**, *41*, 188-192.
2. Li, Q.; Cai, Y.; Hu, Y.; Jin, H.; Chen, F.; Liu, Y.; Zhou, B. Nickel-catalyzed cyclization of 1,7-enynes for the selective synthesis of dihydrocyclobuta[*c*]quinolin-3-ones and benzo[*b*]azocin-2-ones. *Chem. Commun.* **2021**, *57*, 11657-11660.
3. Akhmetov, V.; Feofanov, M.; Sharapa, D. I.; Amsharov, K. Alumina-mediated  $\pi$ -Activation of Alkynes. *J. Am. Chem. Soc.* **2021**, *143*, 15420-15426.
4. Ito, S.; Fujimoto, H.; Tobisu, M. Non-stabilized vinyl anion equivalents from styrenes by *N*-heterocyclic carbene catalysis and its use in catalytic nucleophilic aromatic substitution. *J. Am. Chem. Soc.* **2022**, *144*, 6714-6718.
5. Matsushima, T.; Kobayashi, S.; Watanabe, S. Air-driven potassium iodide-mediated oxidative photocyclization of stilbene derivatives. *J. Org. Chem.* **2016**, *81*, 7799-7806.

7.  $^1\text{H}$ ,  $^{13}\text{C}$ ,  $^{19}\text{F}$  NMR spectra of products (3aa-qa, 3sa, 4a-c, 5ab-ai, 6aj, 7a-e)

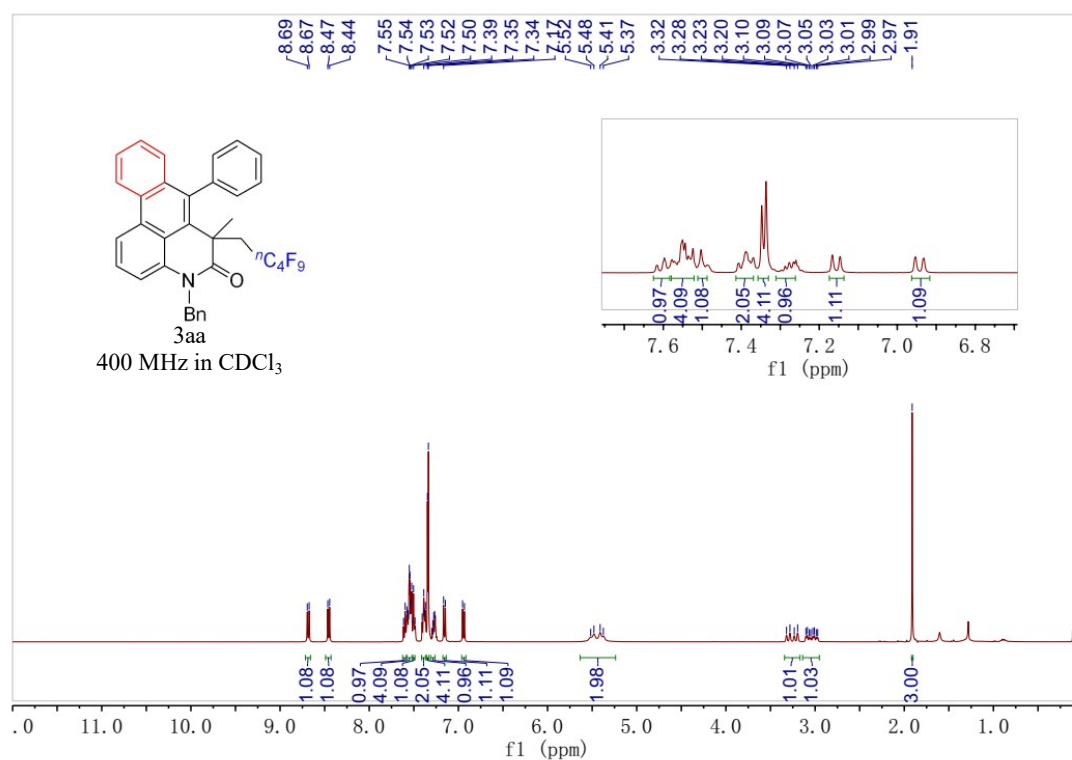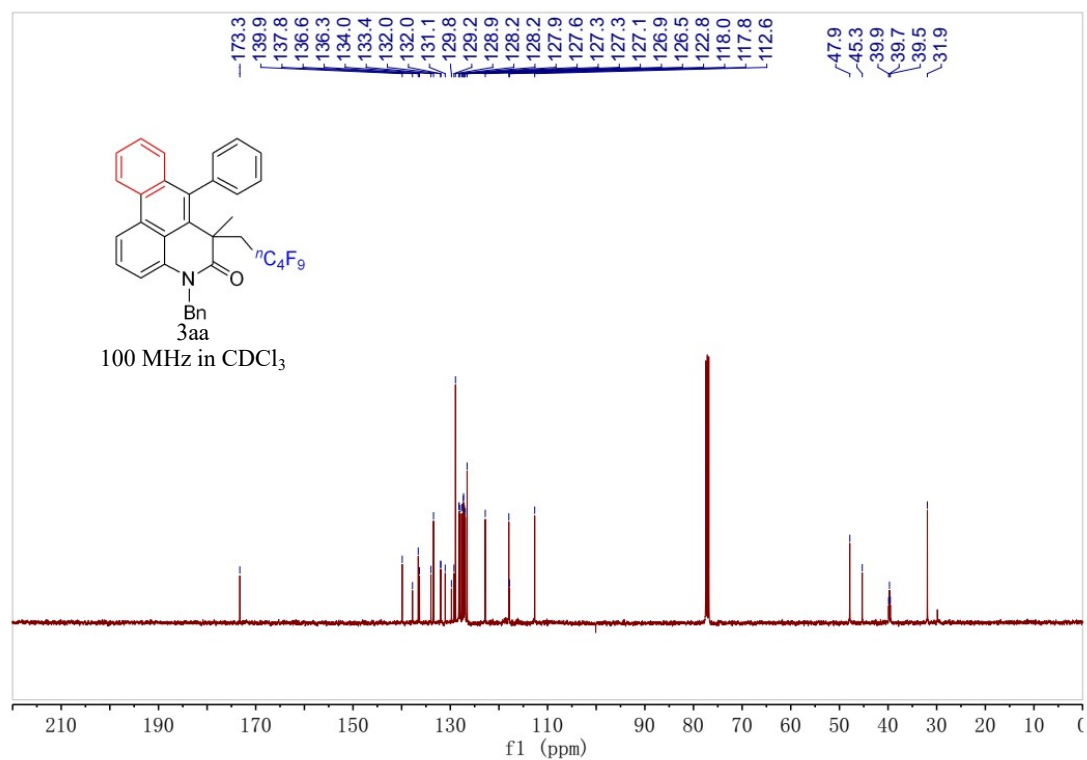

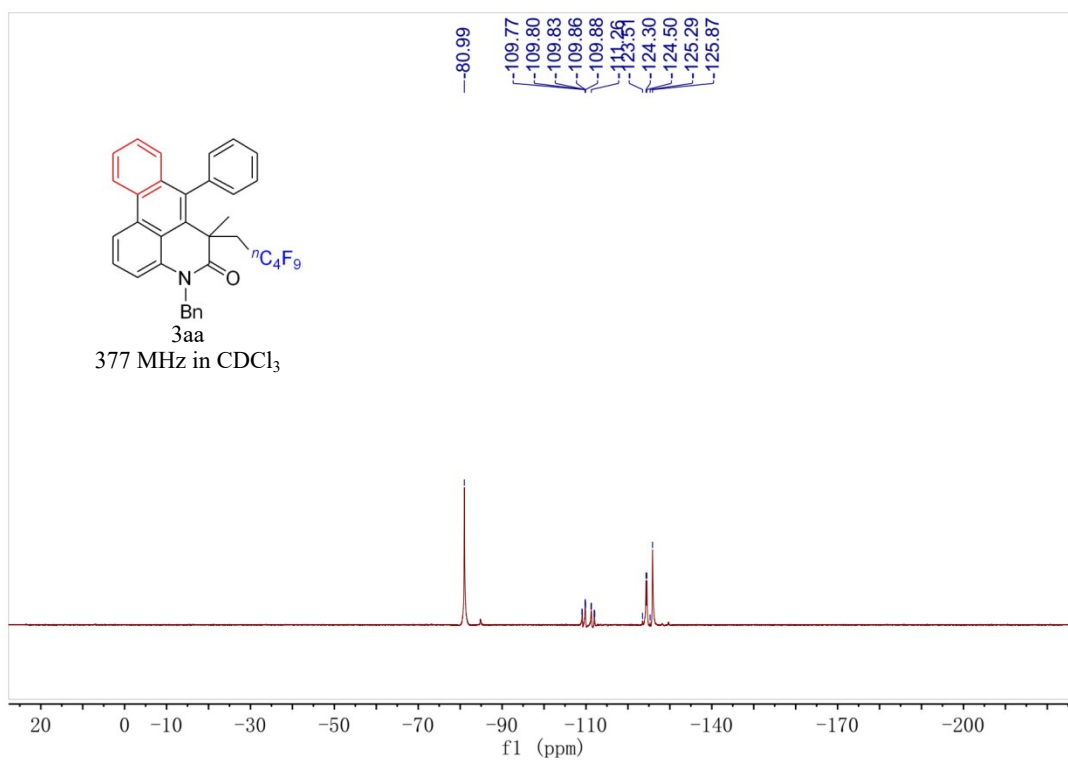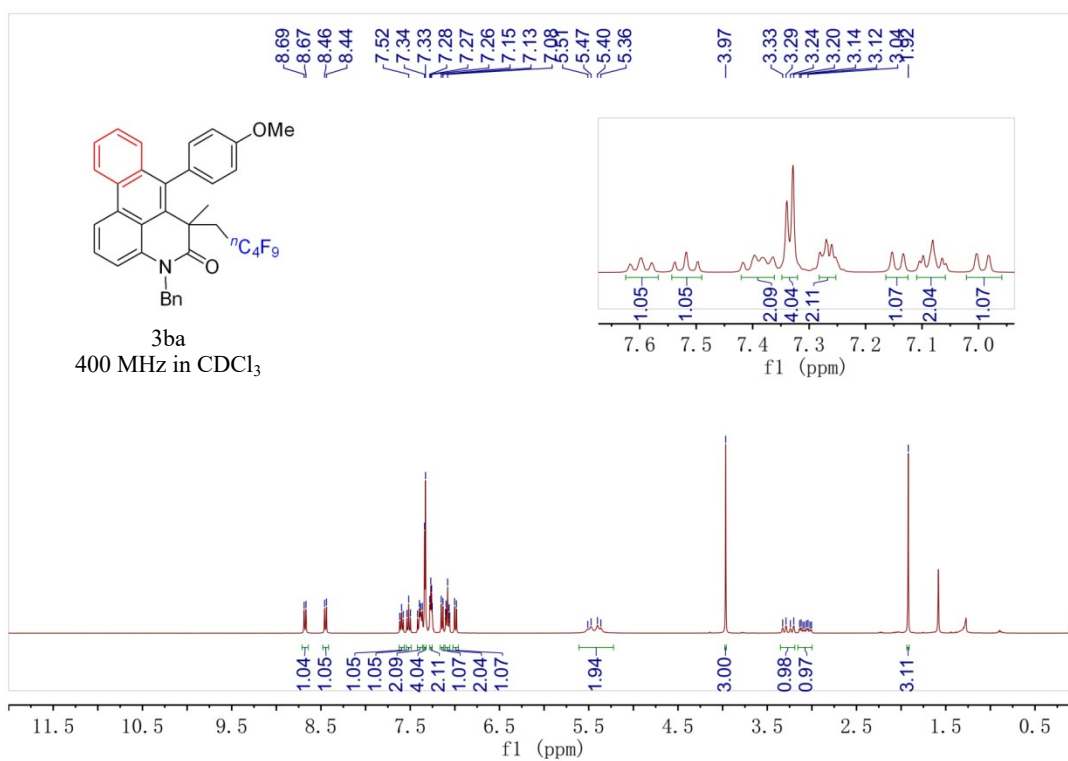

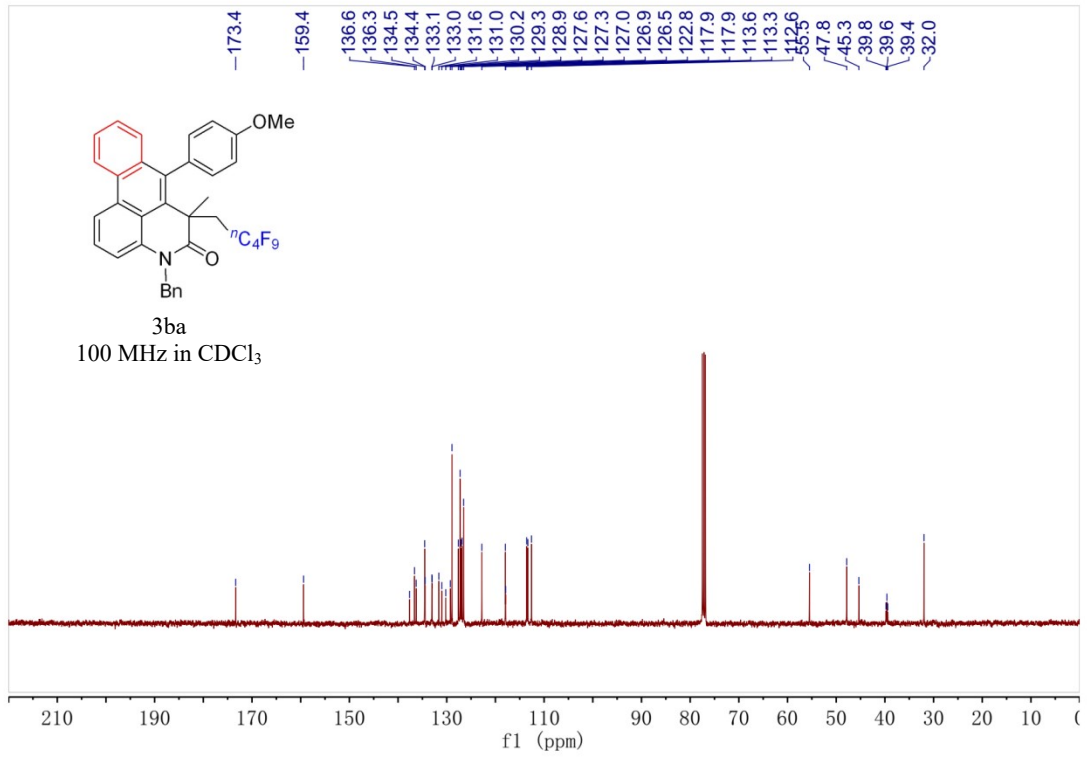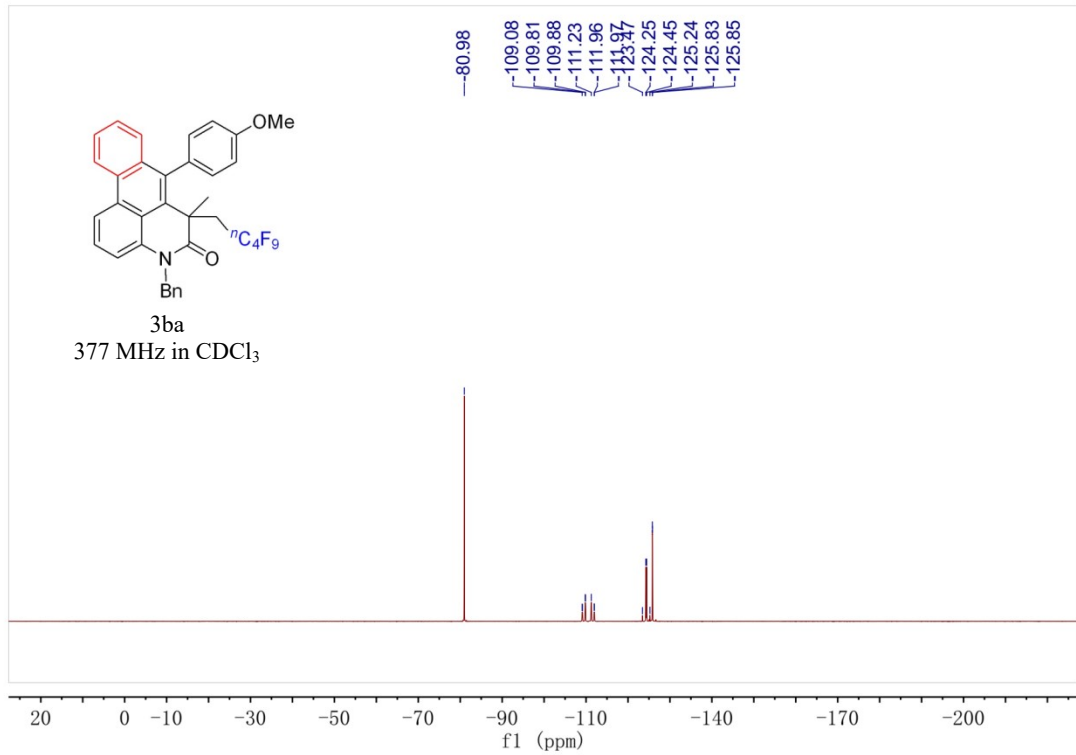

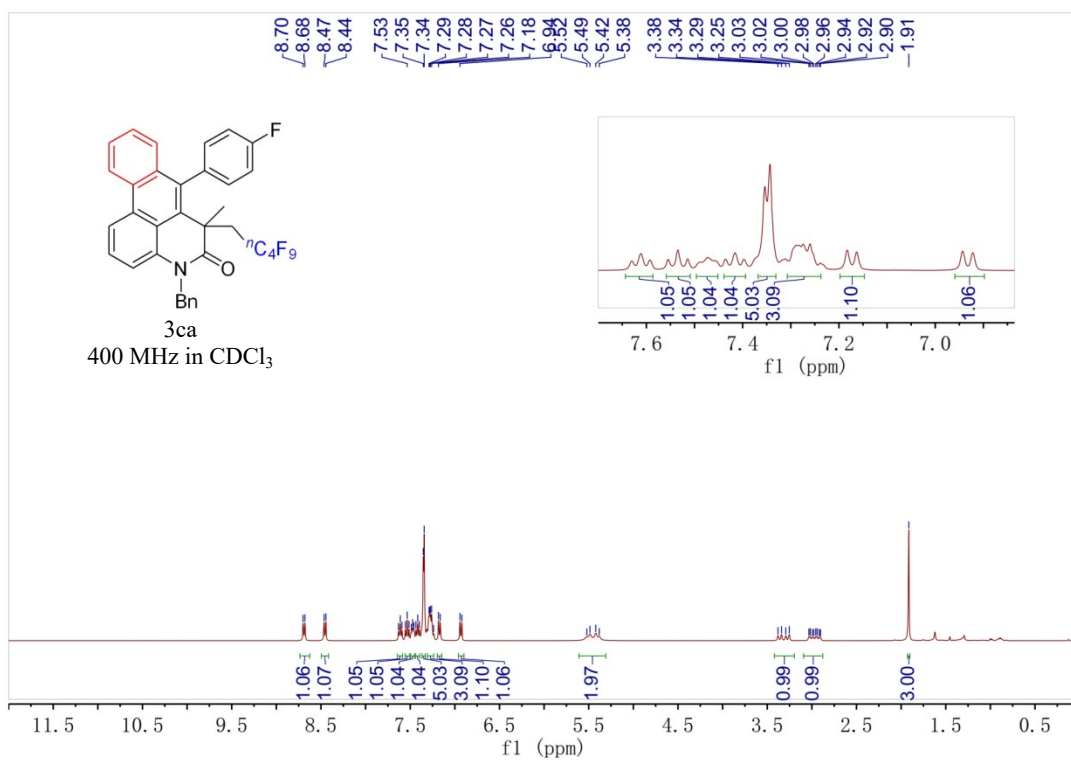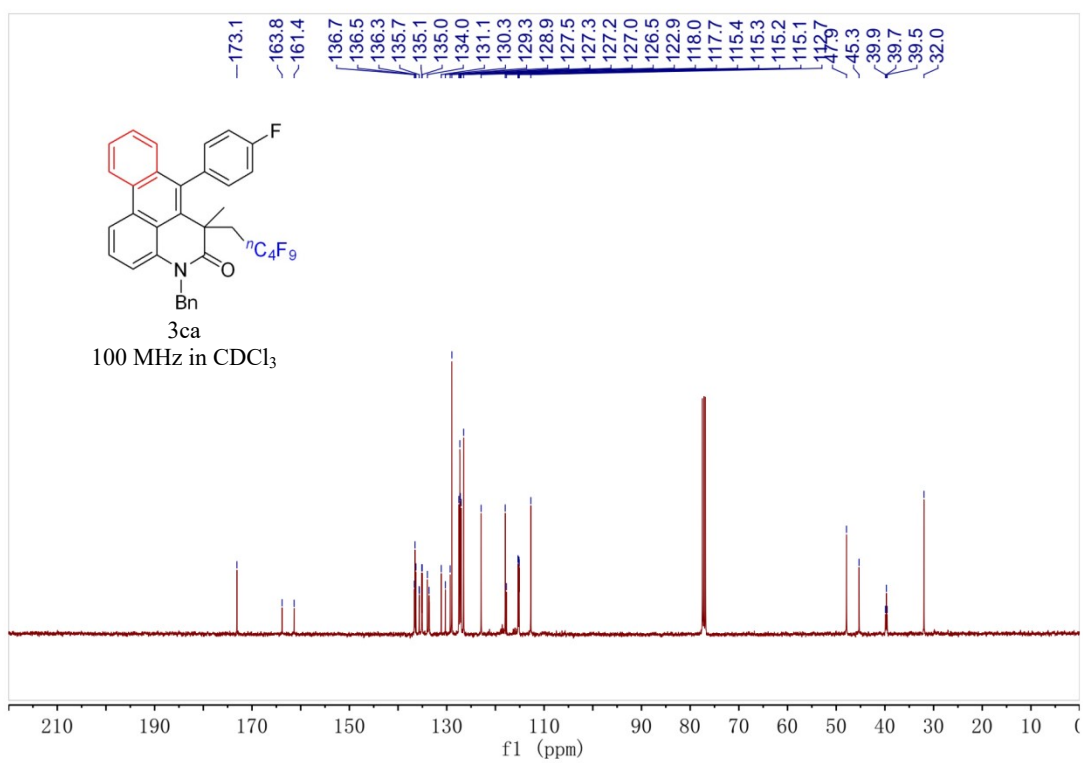

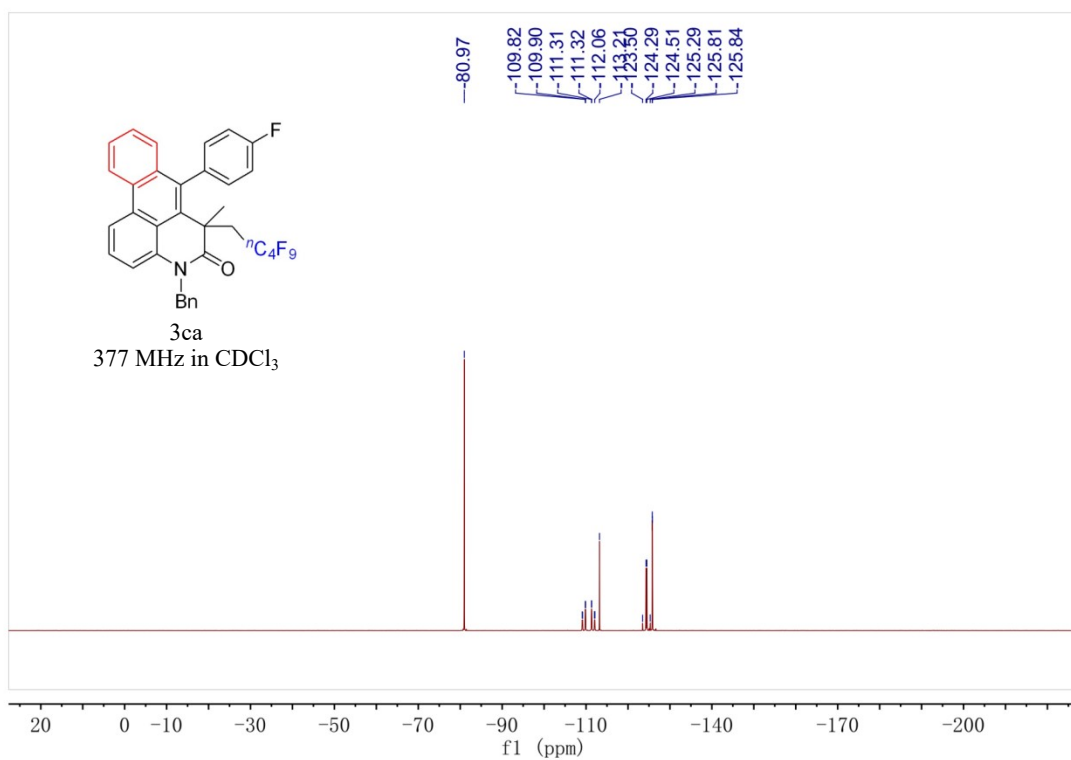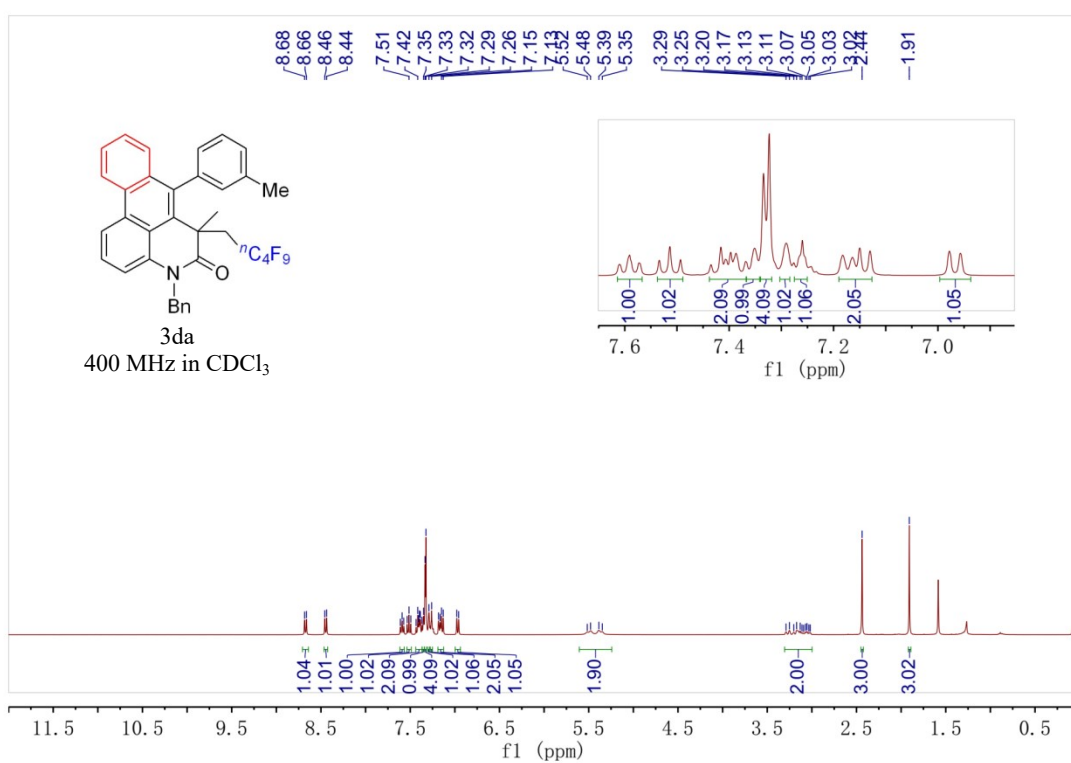

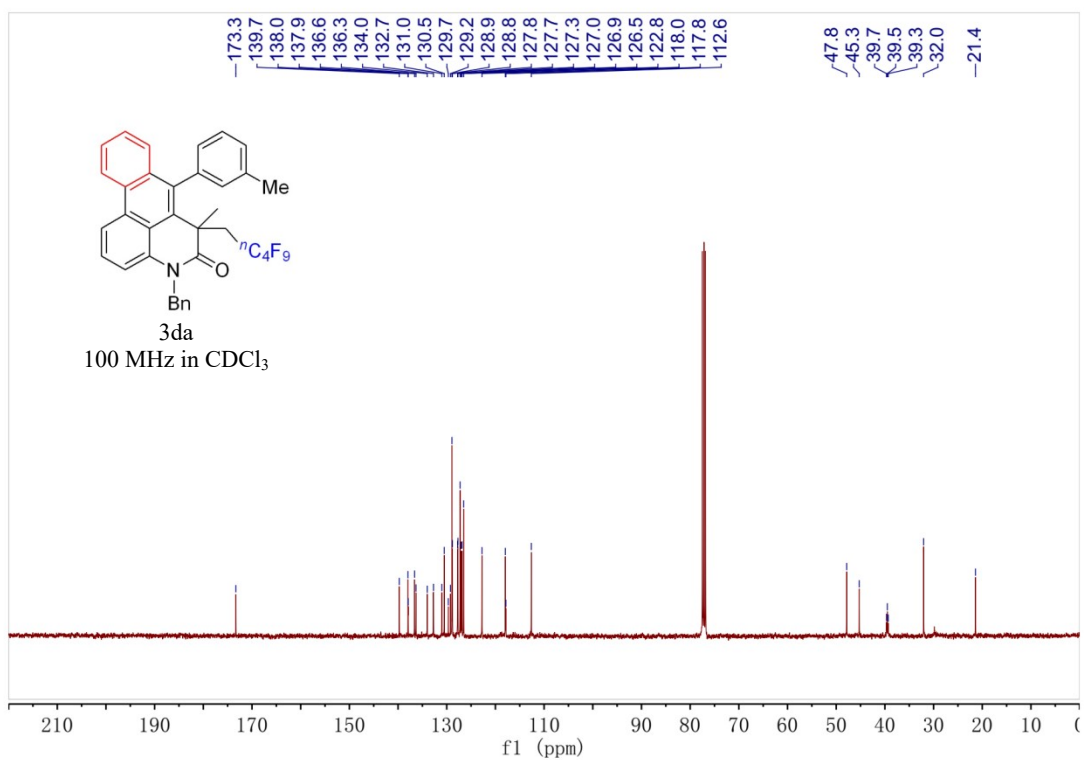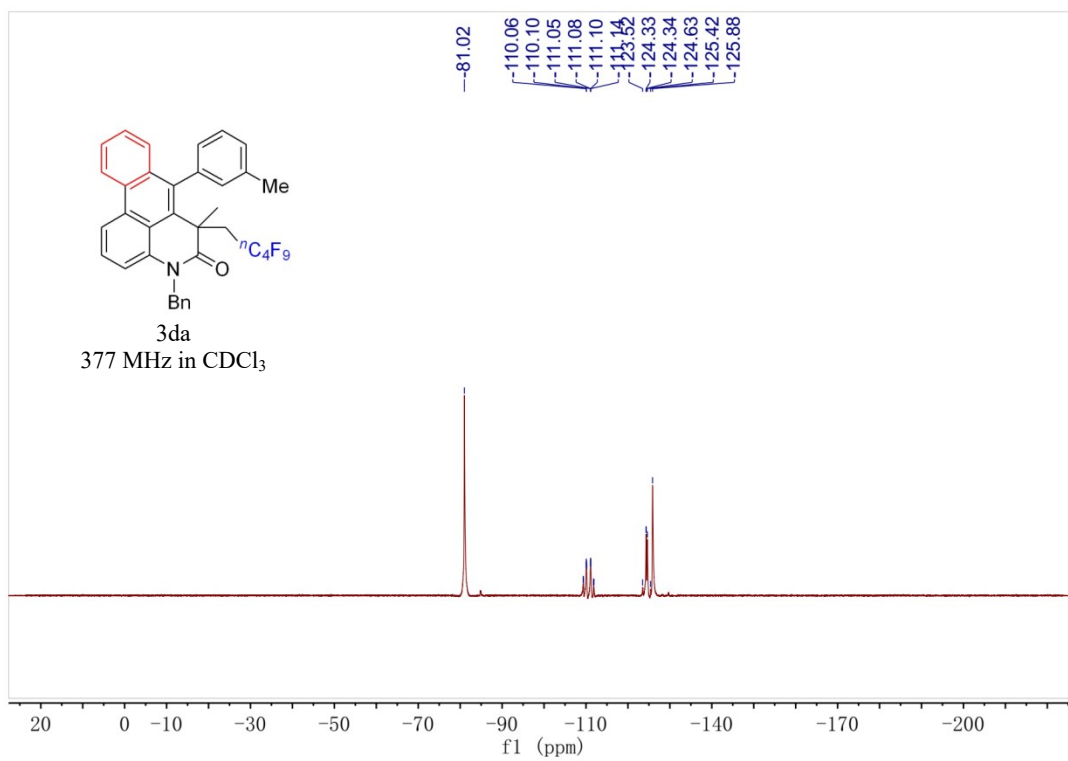



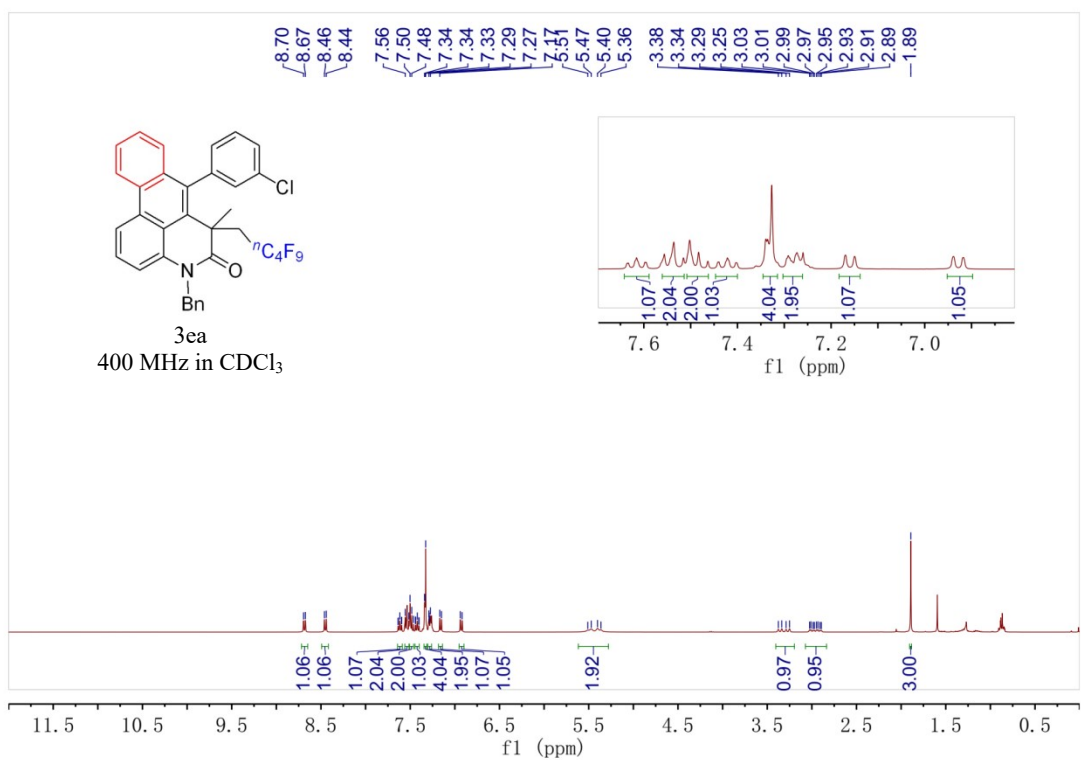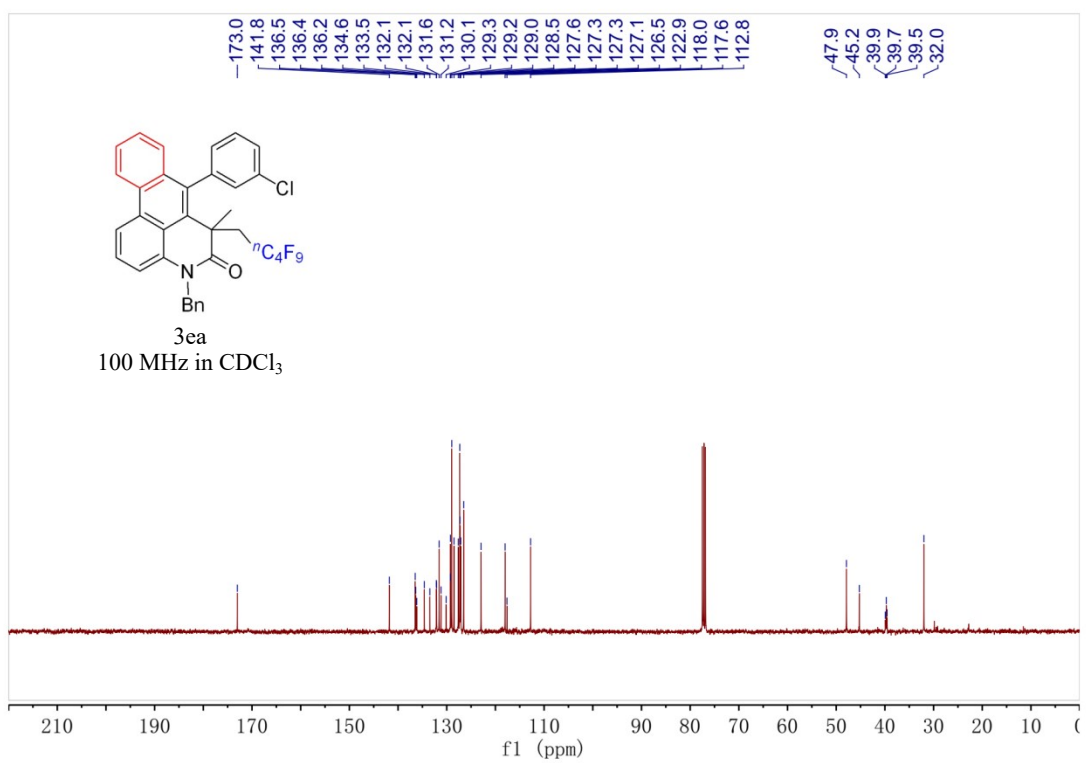

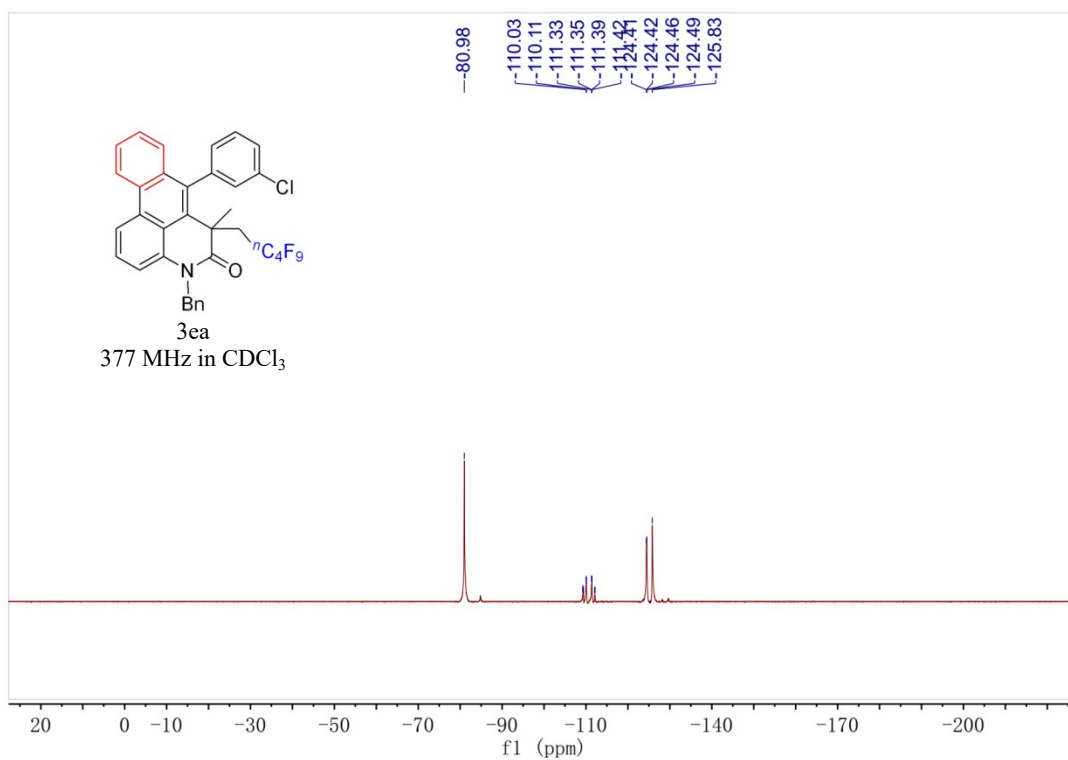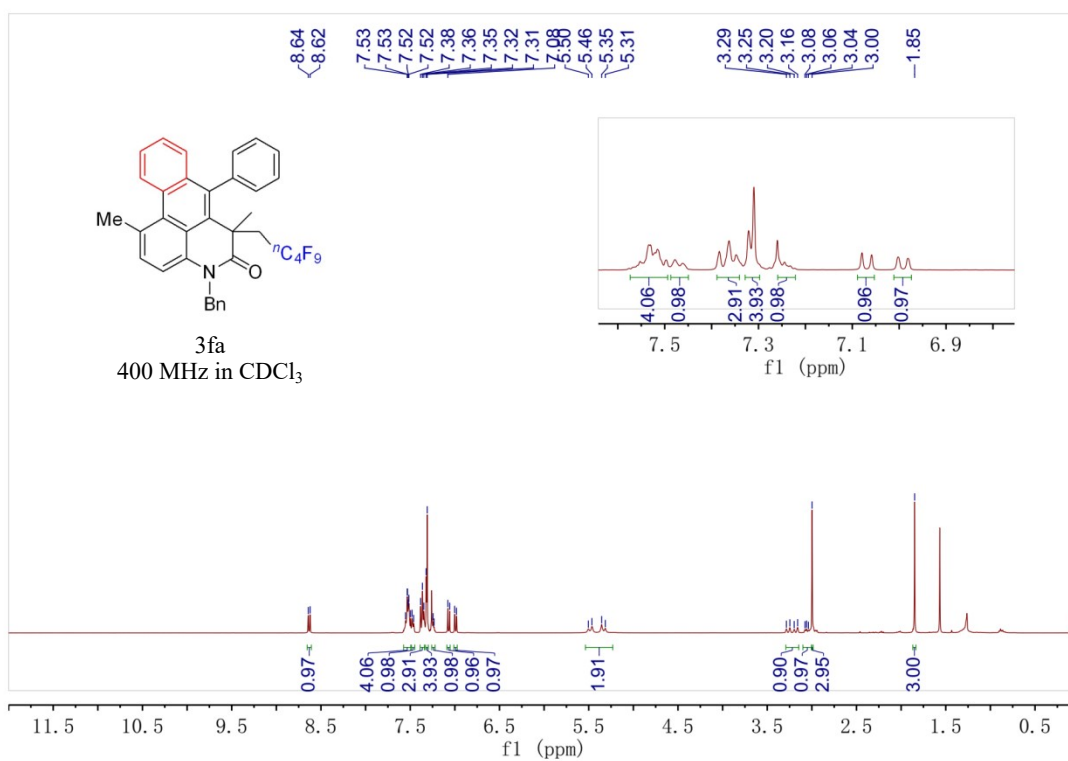

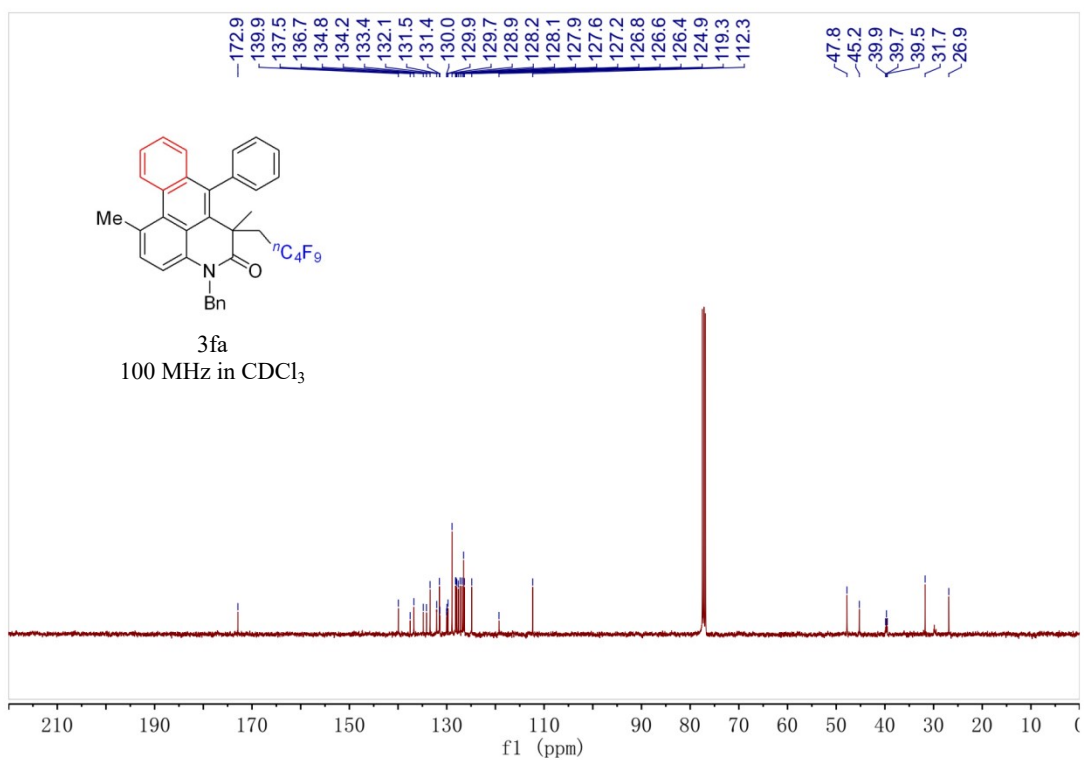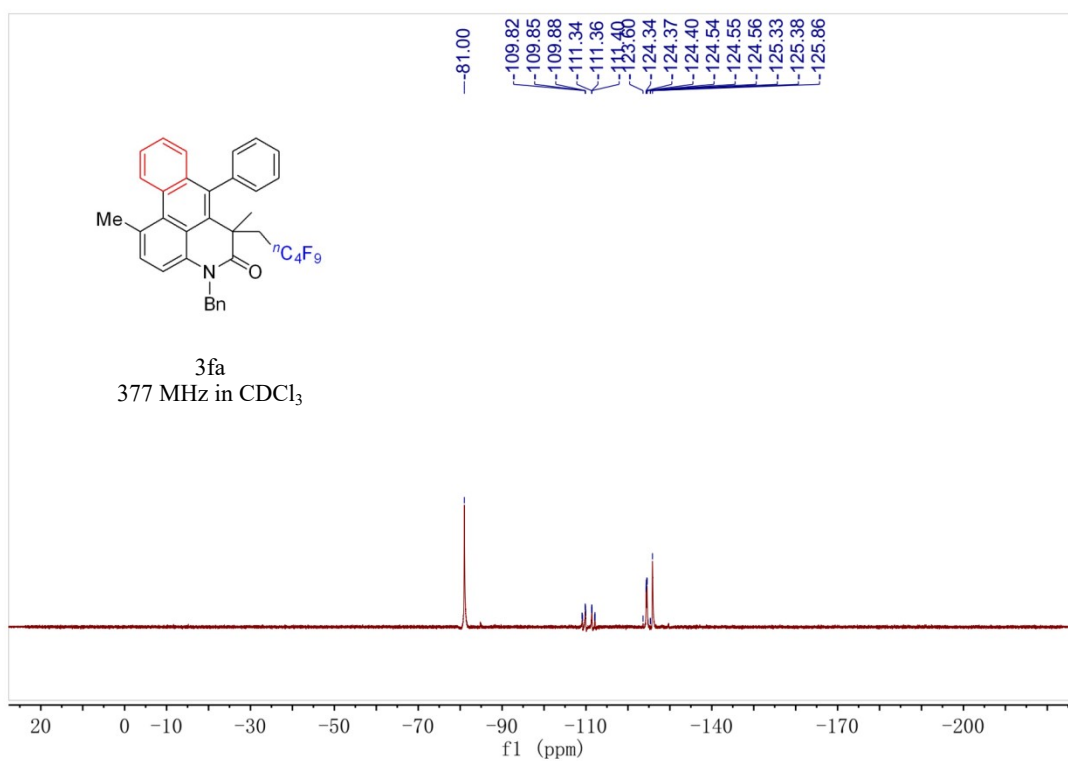

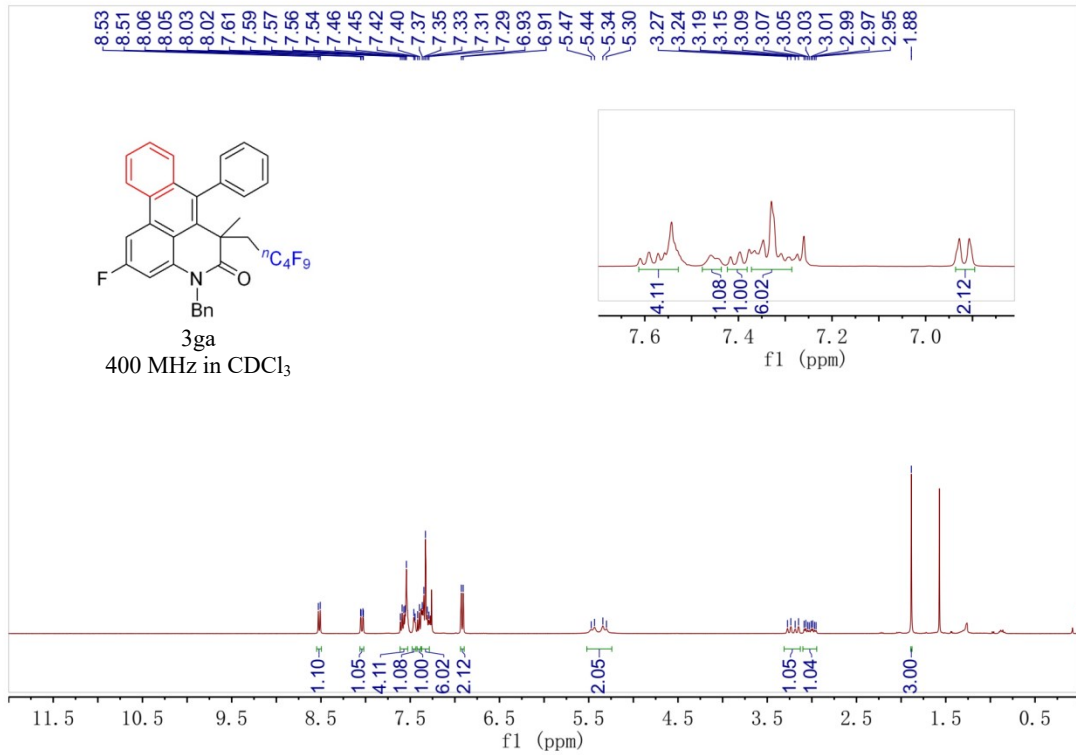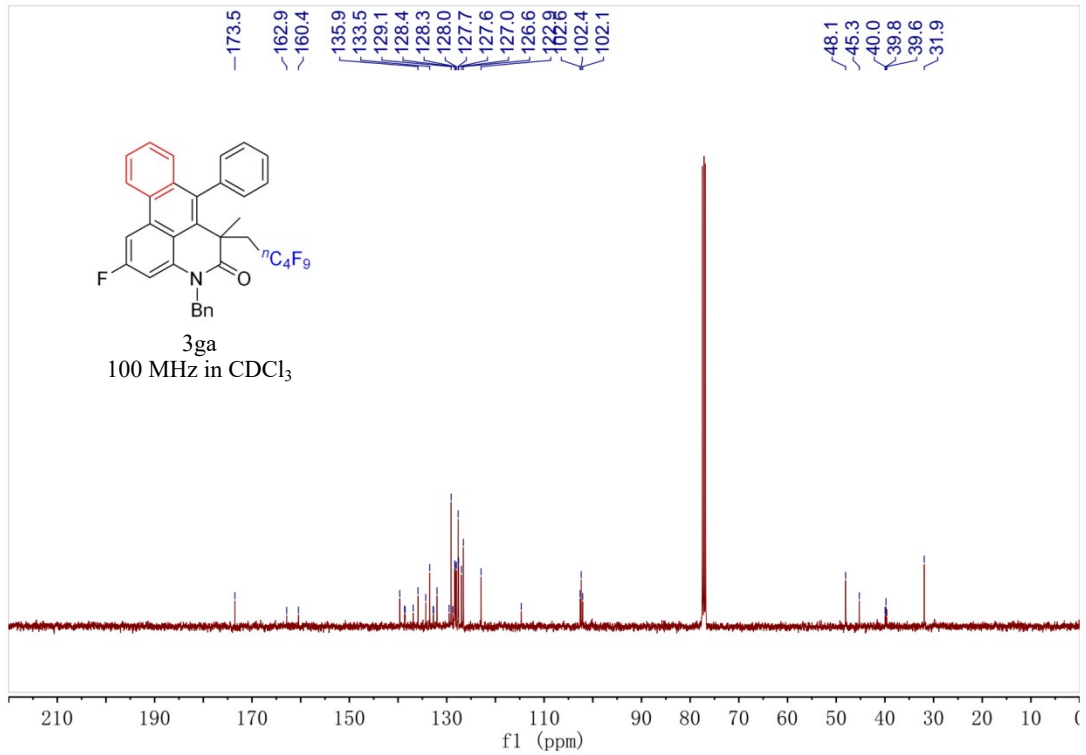

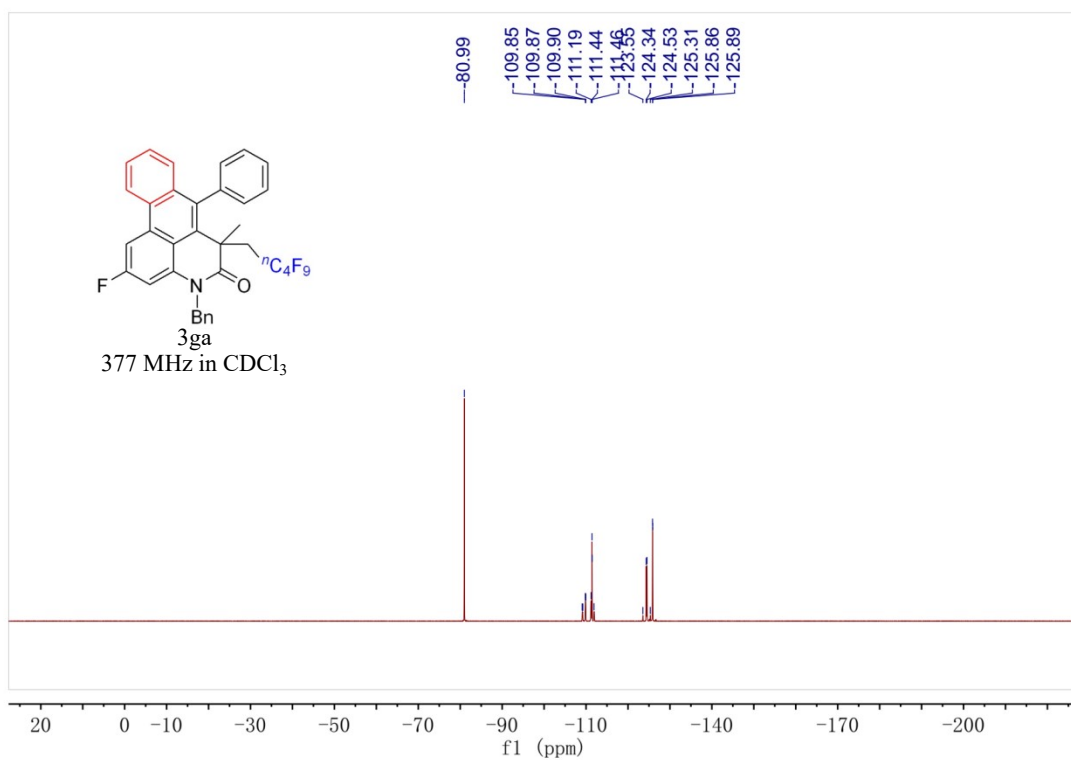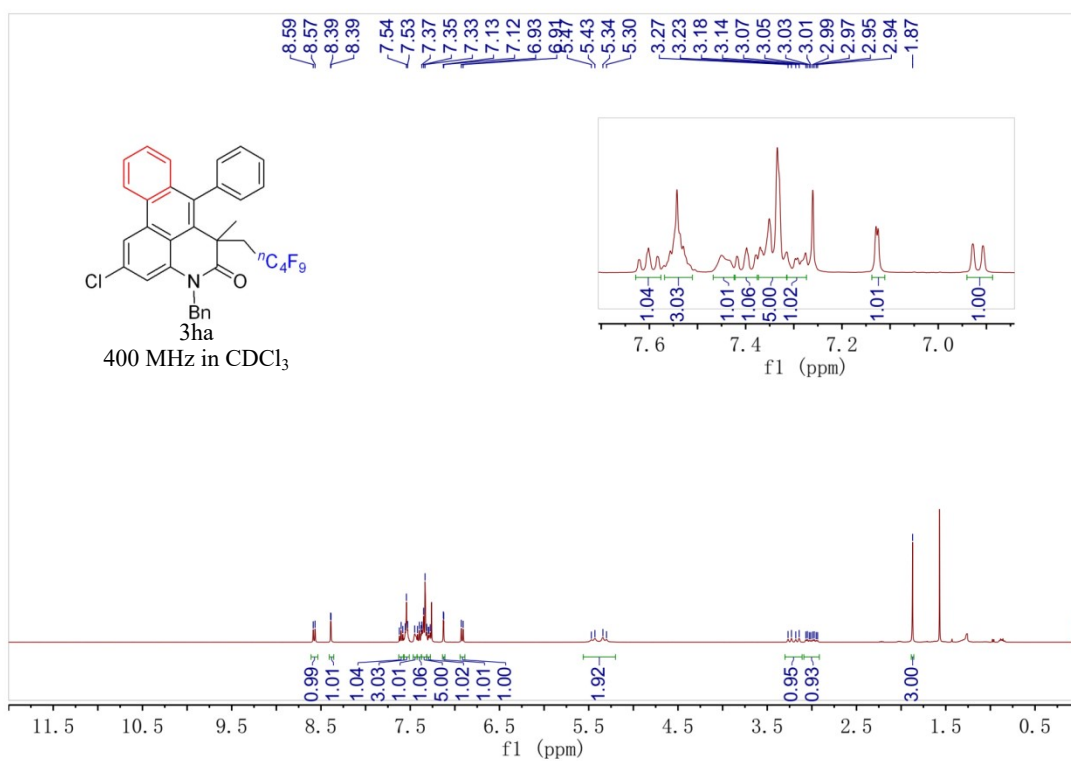

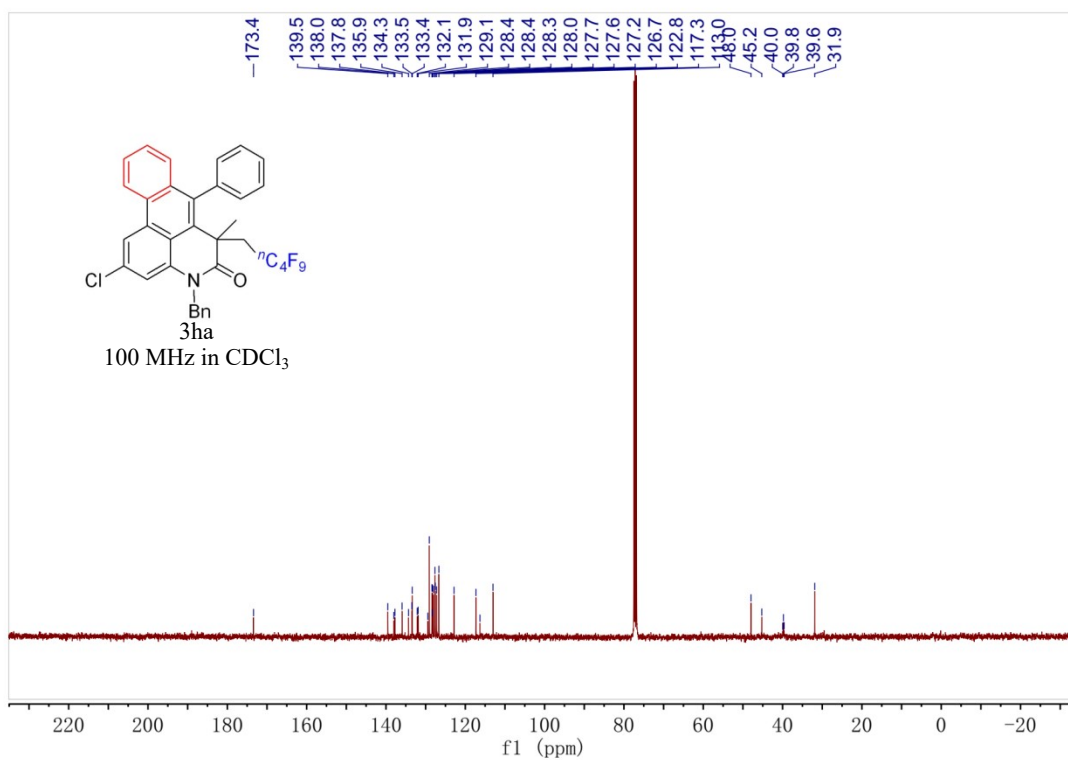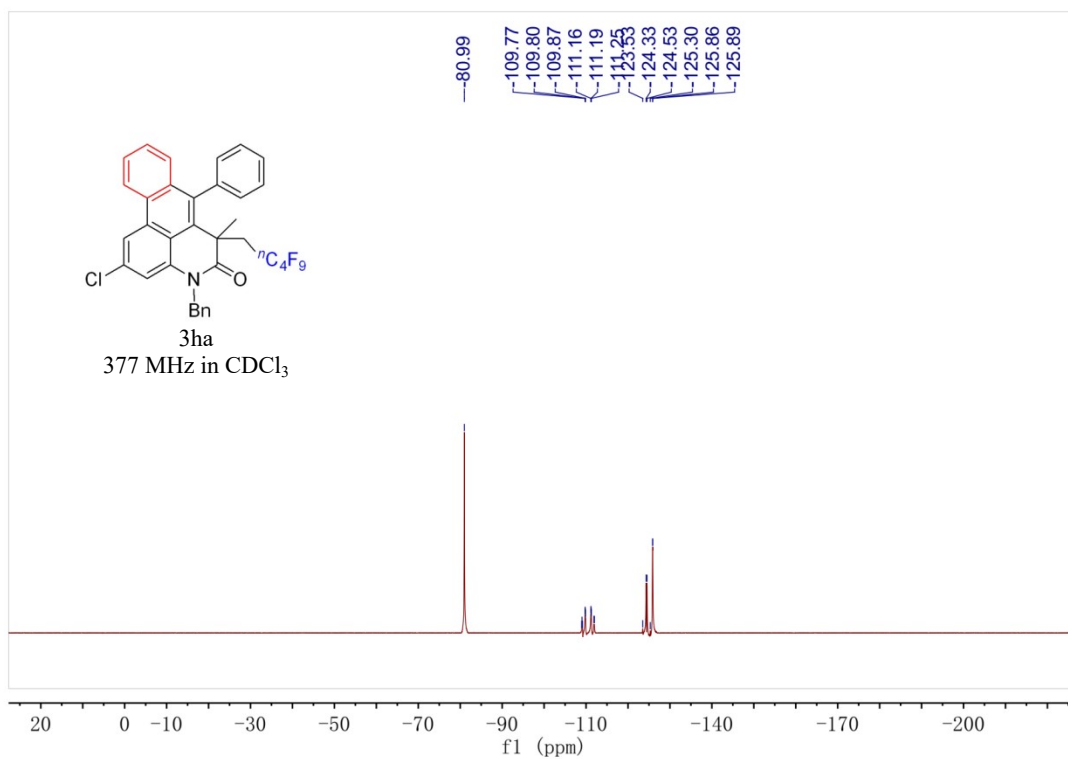

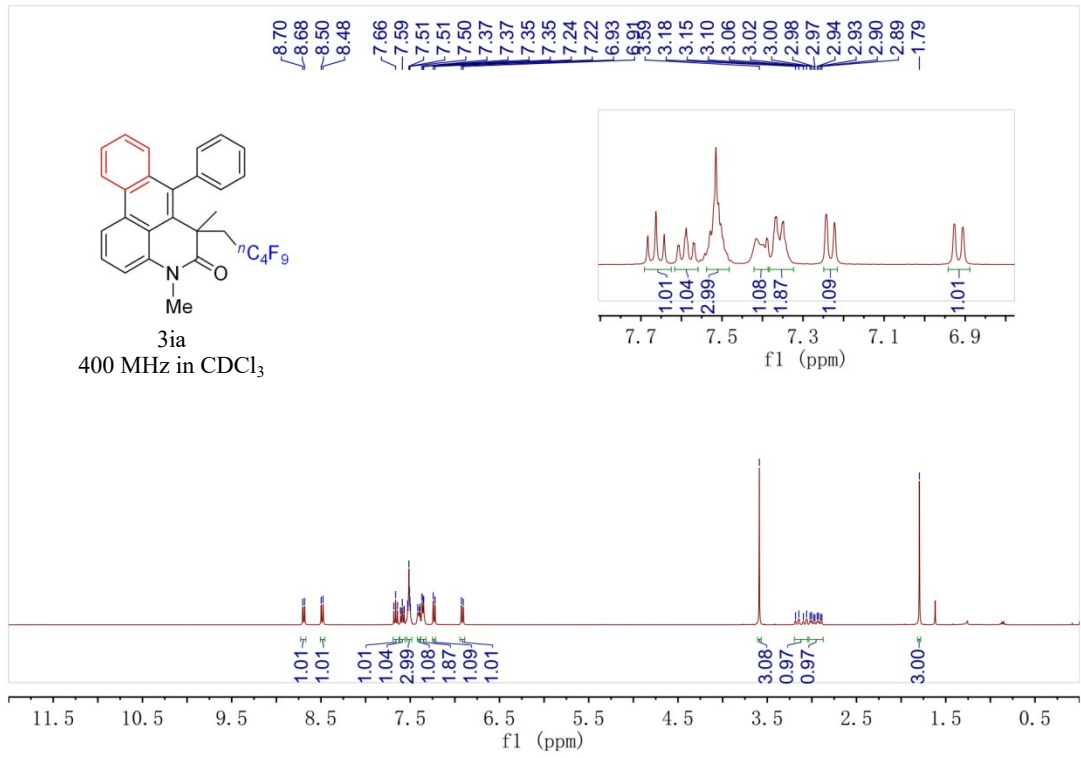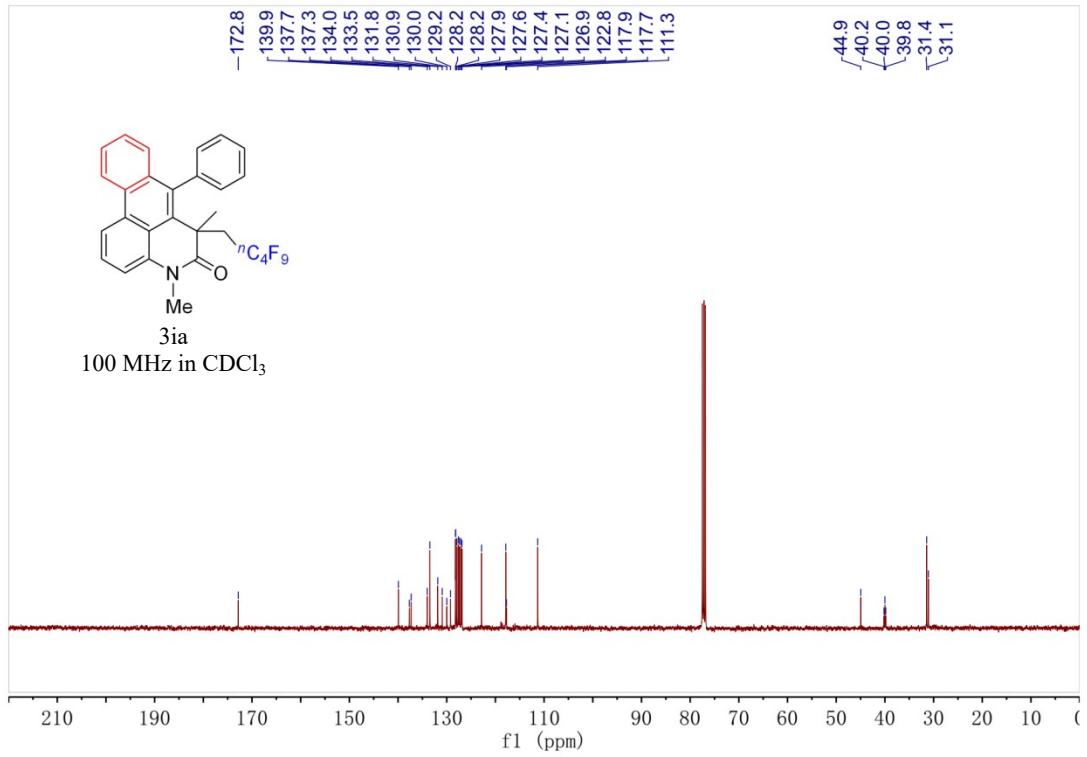

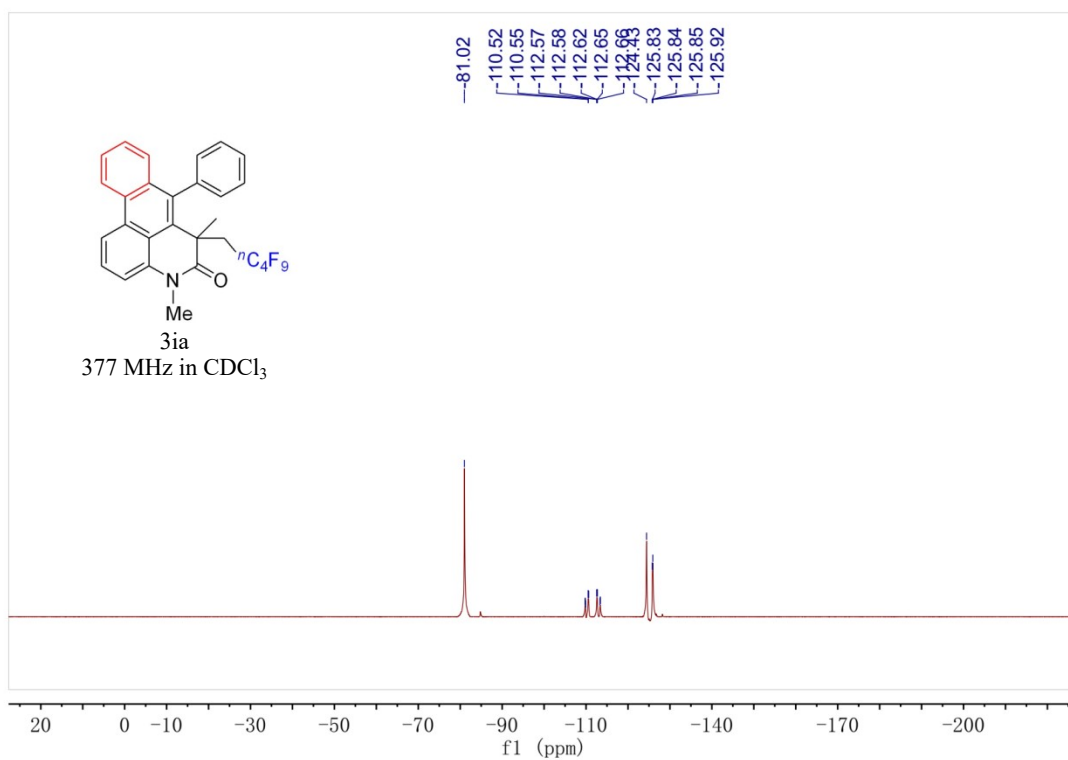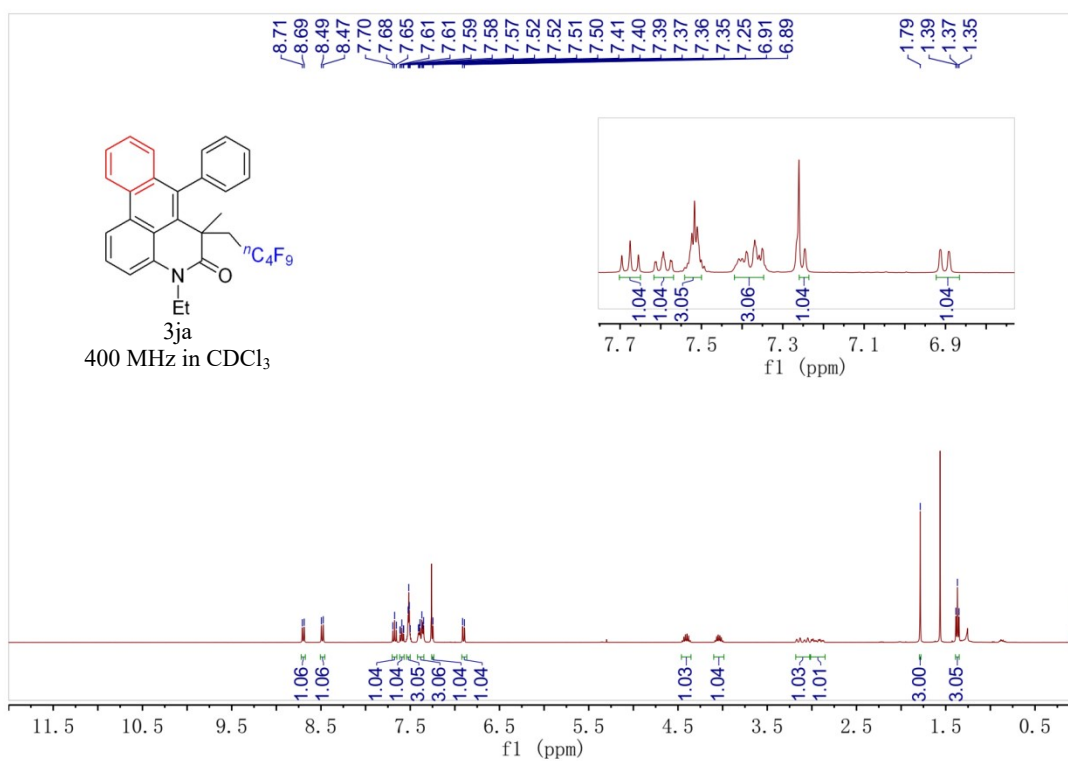



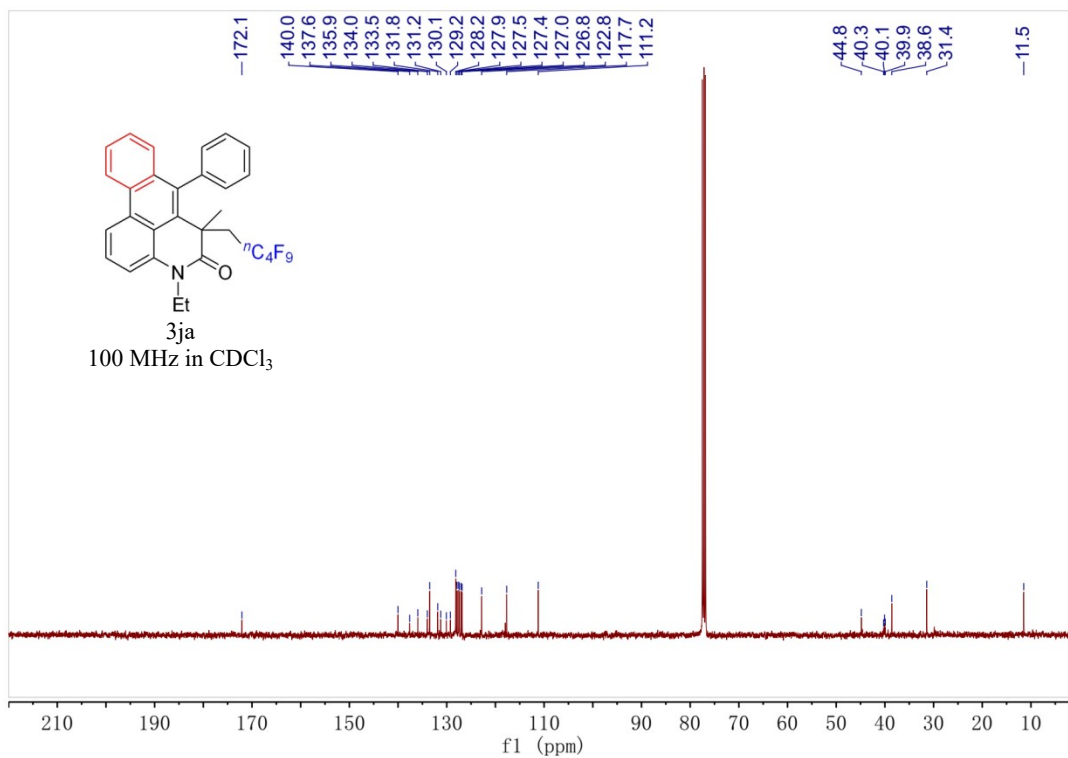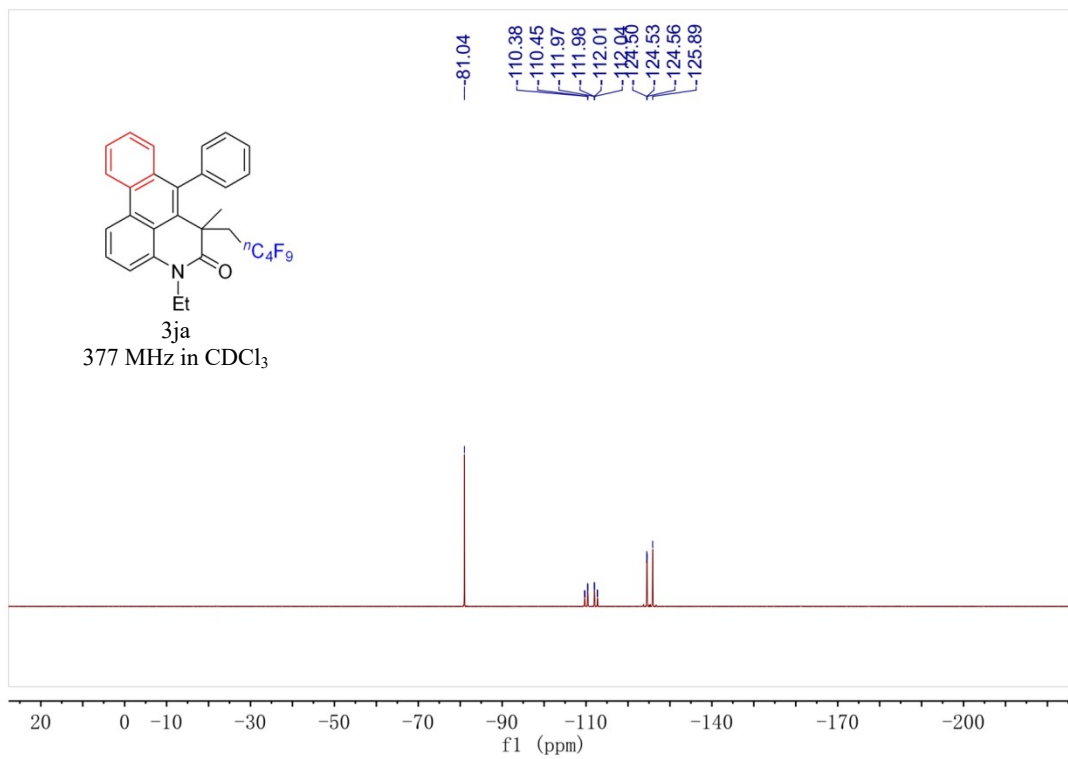

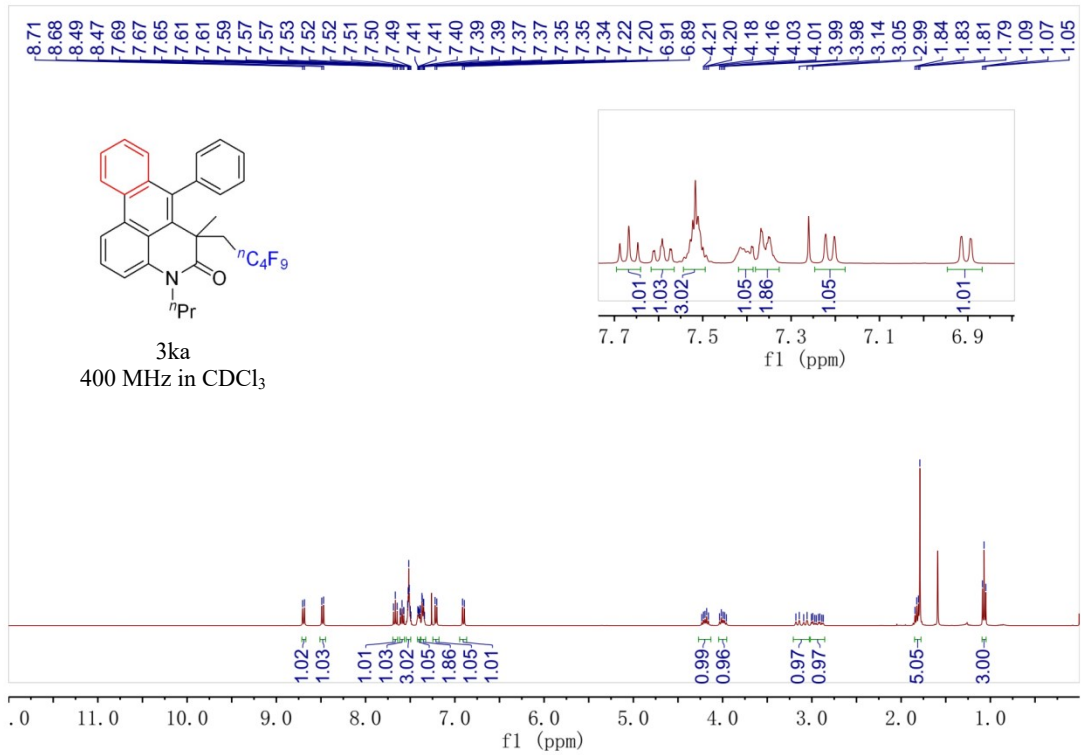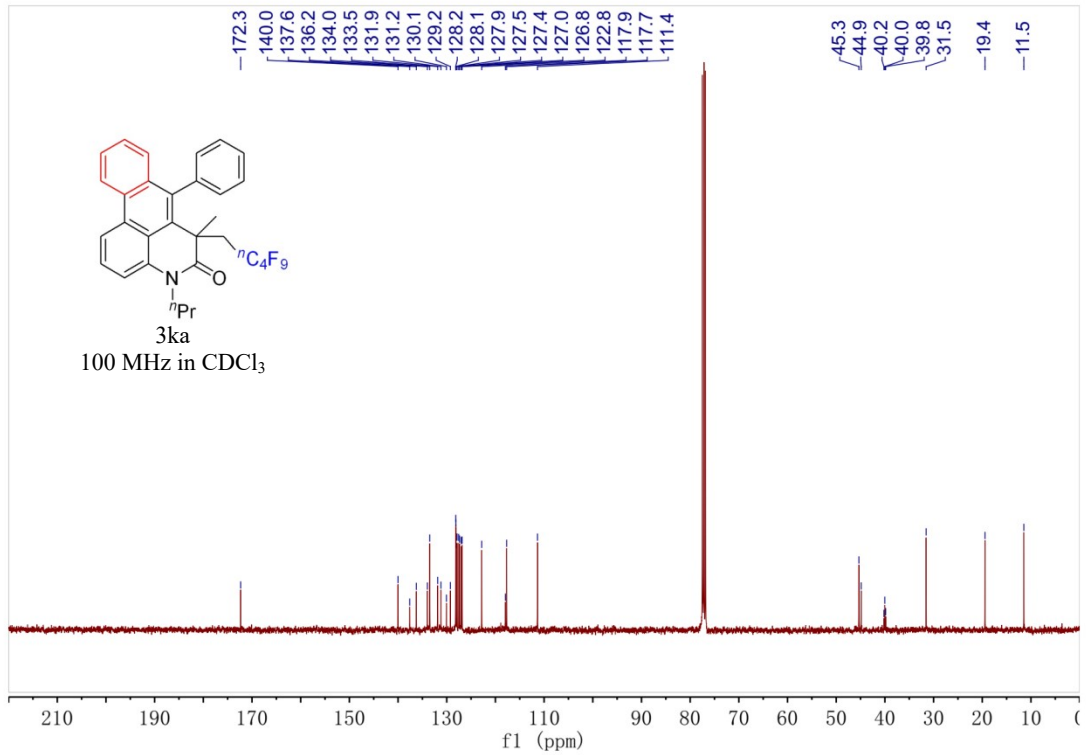

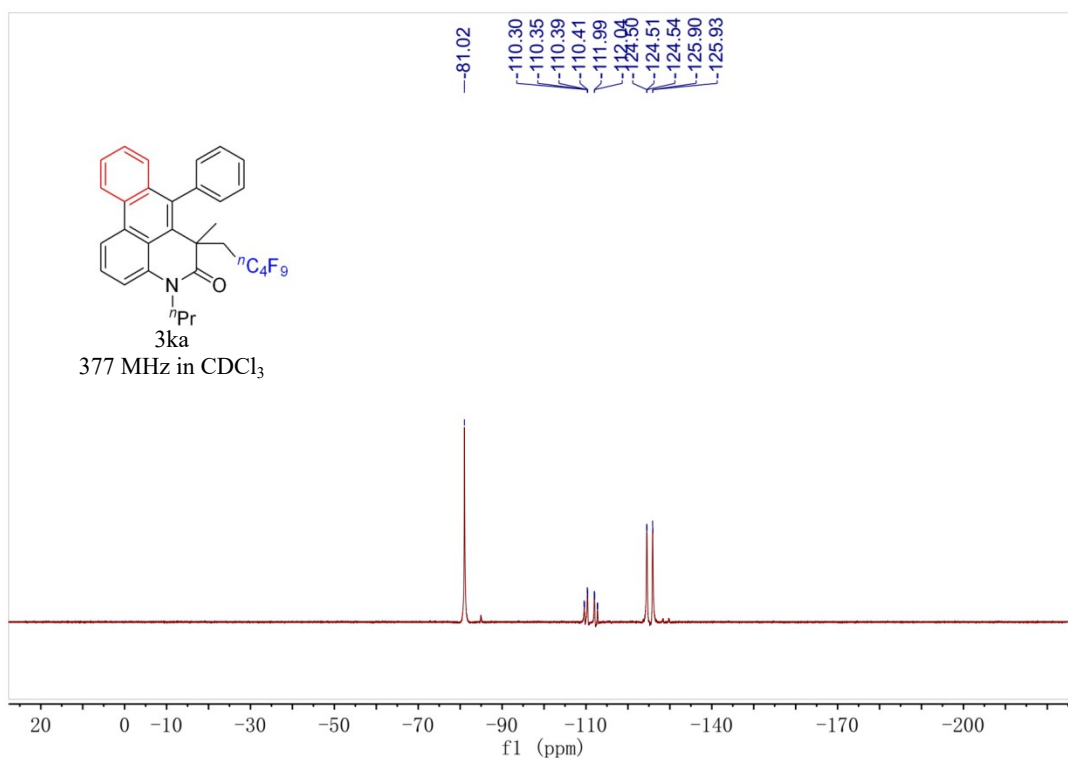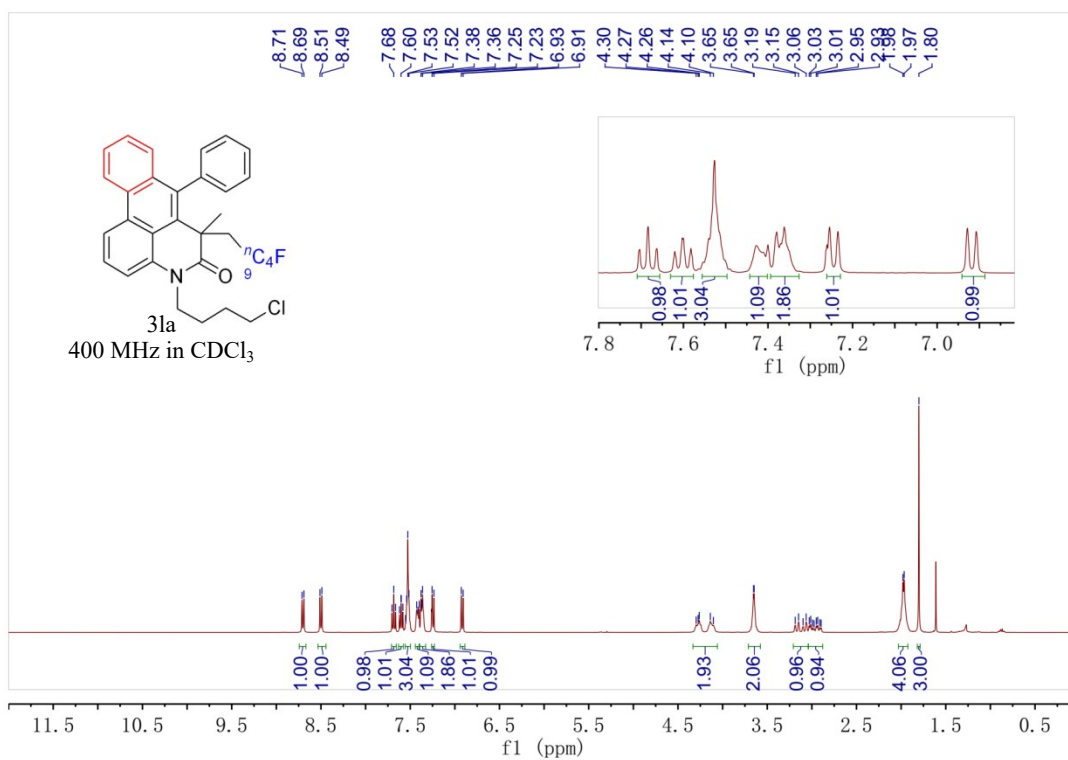

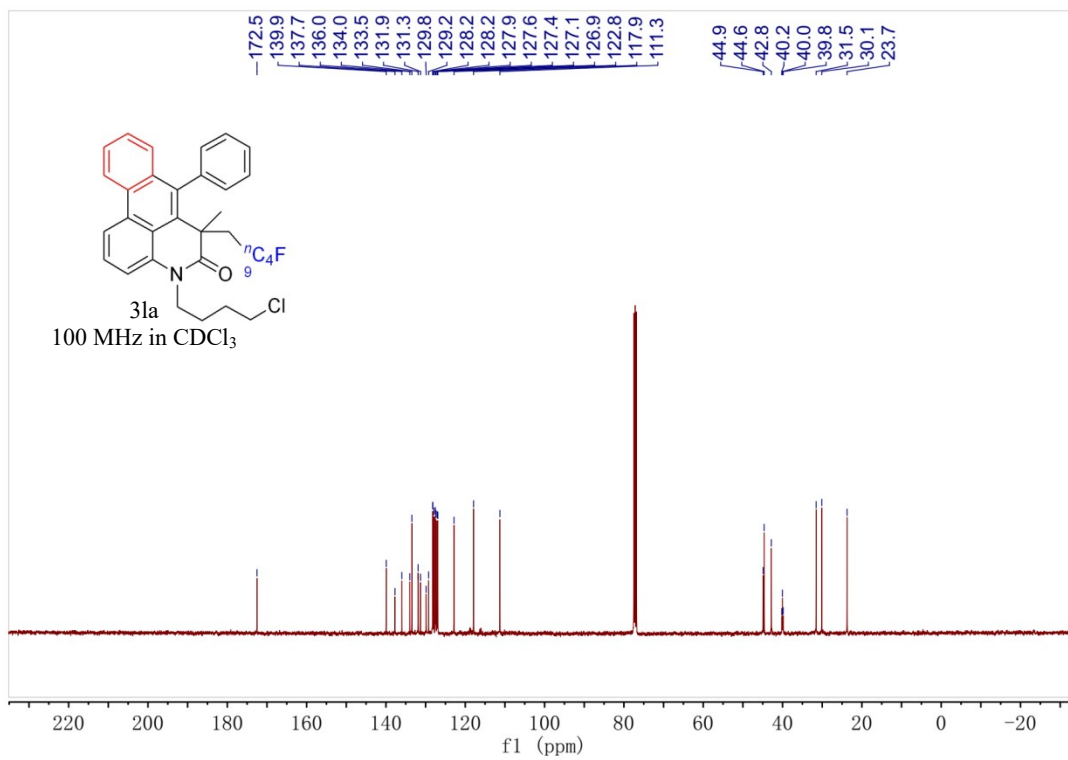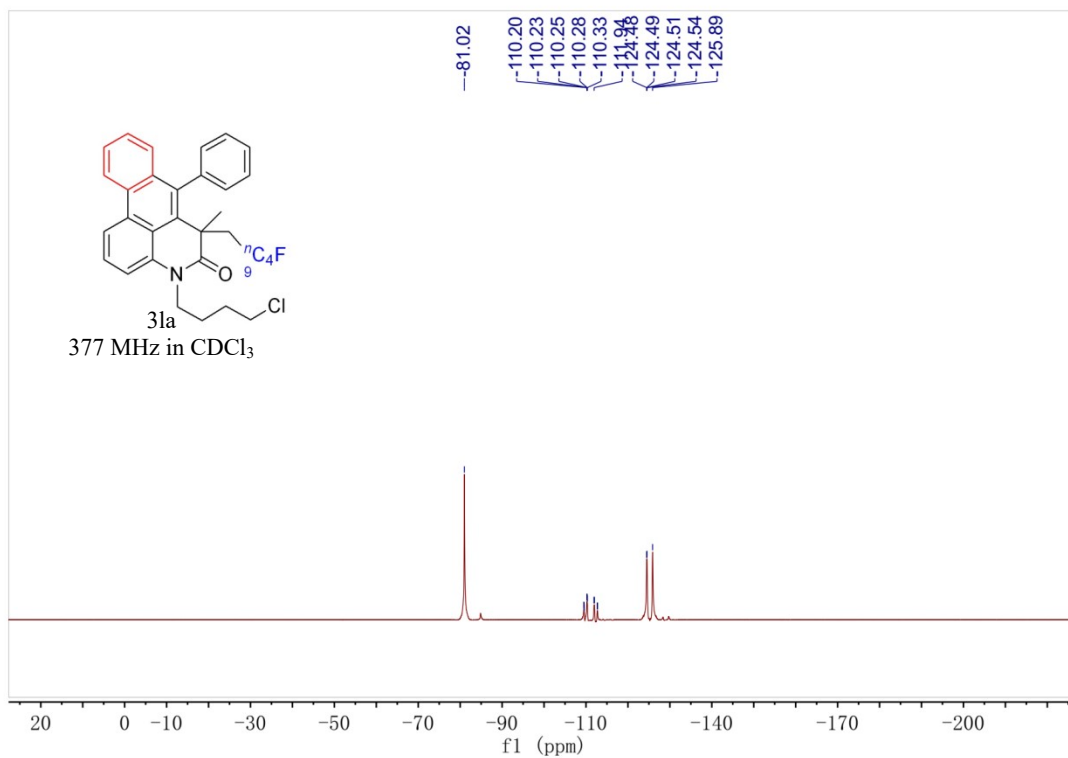

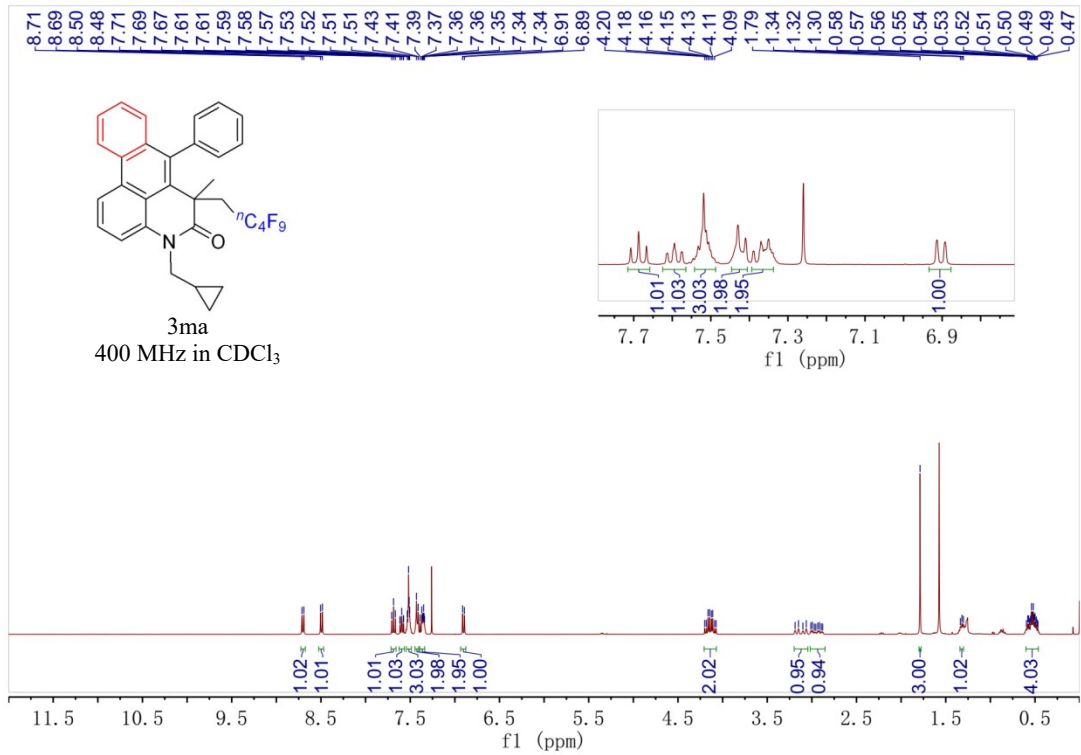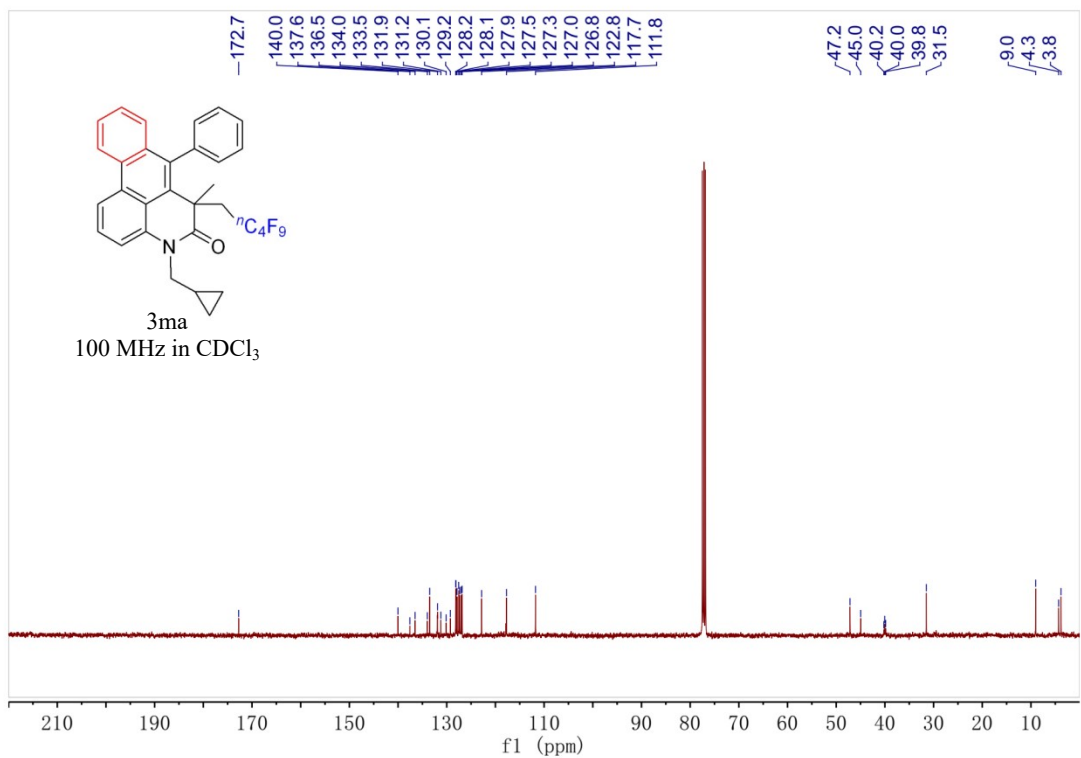

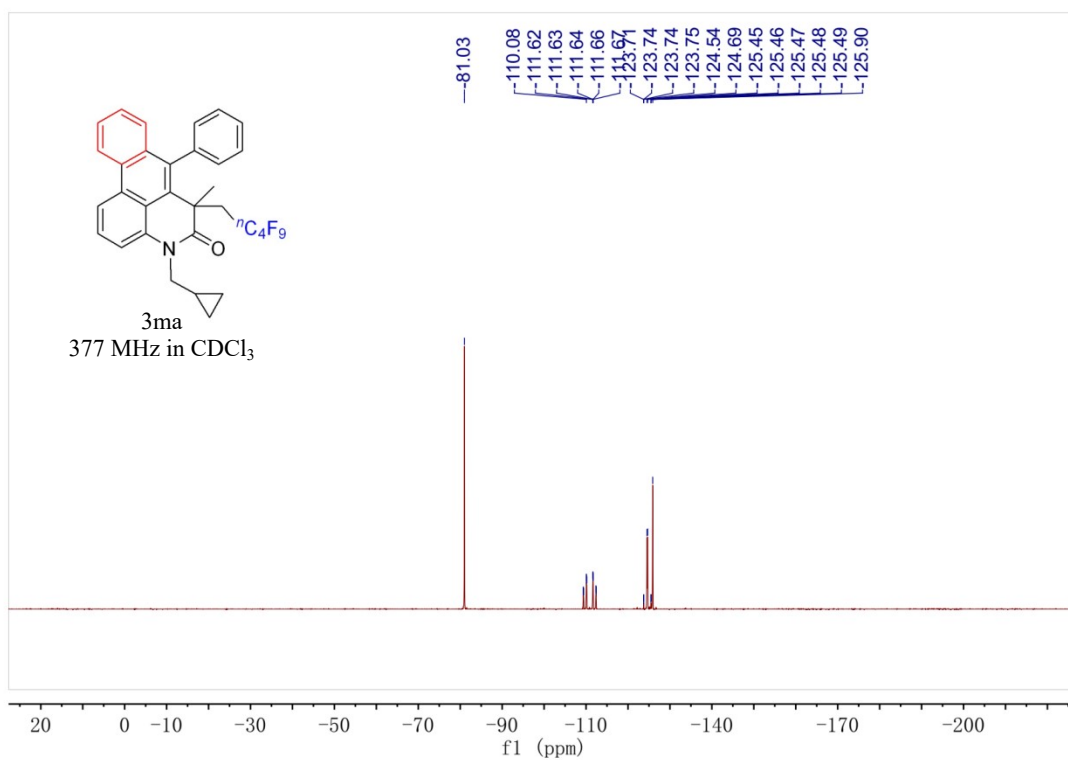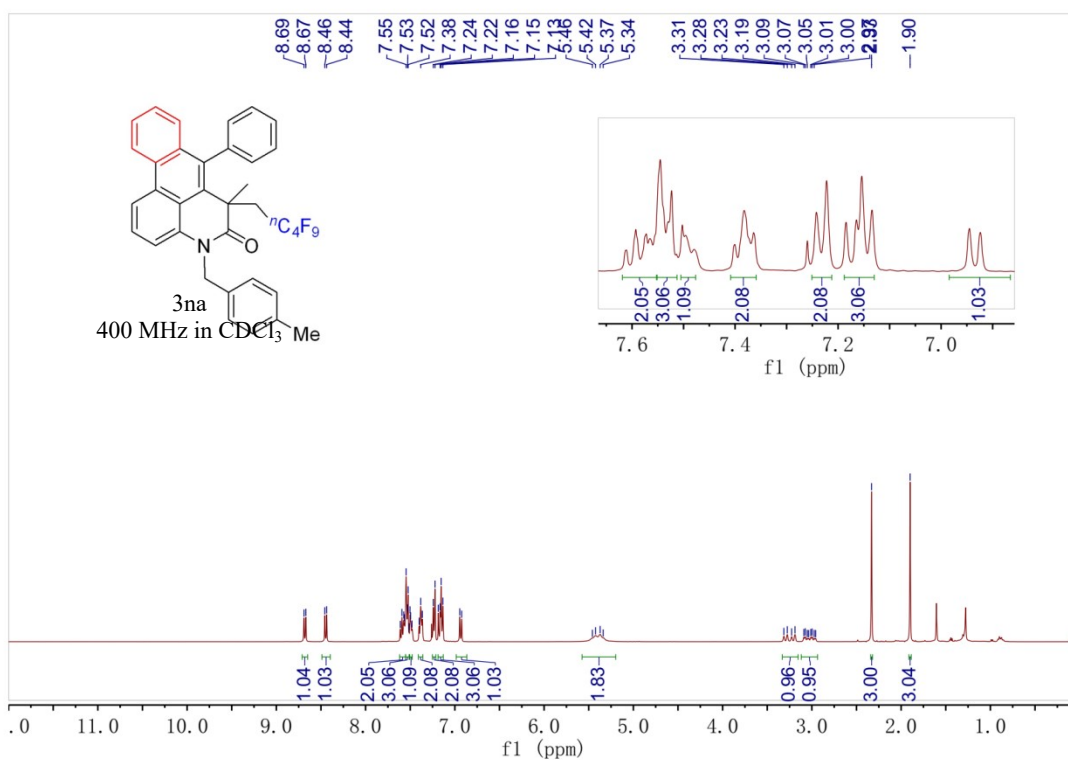

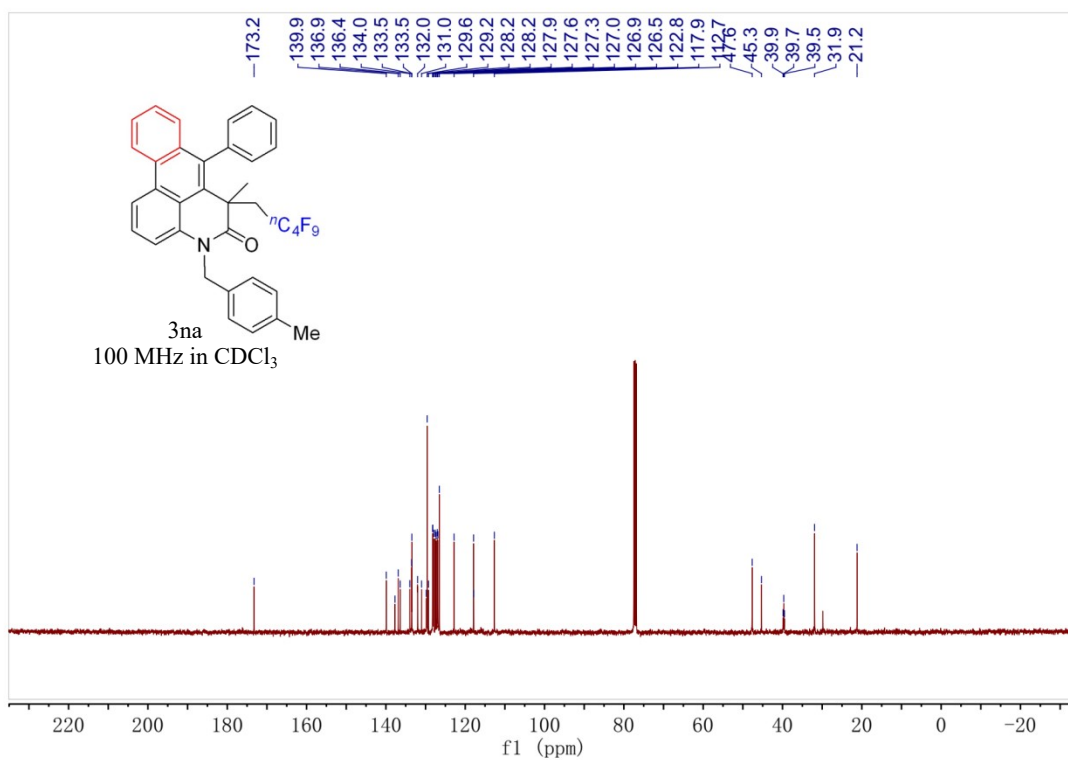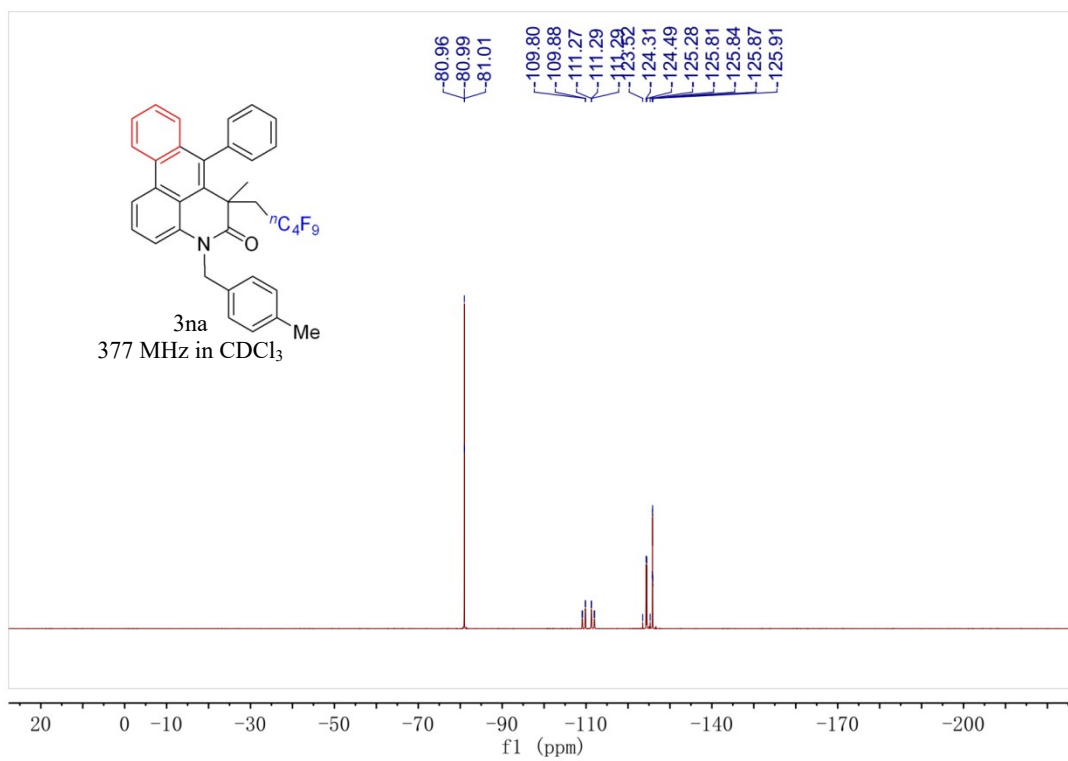

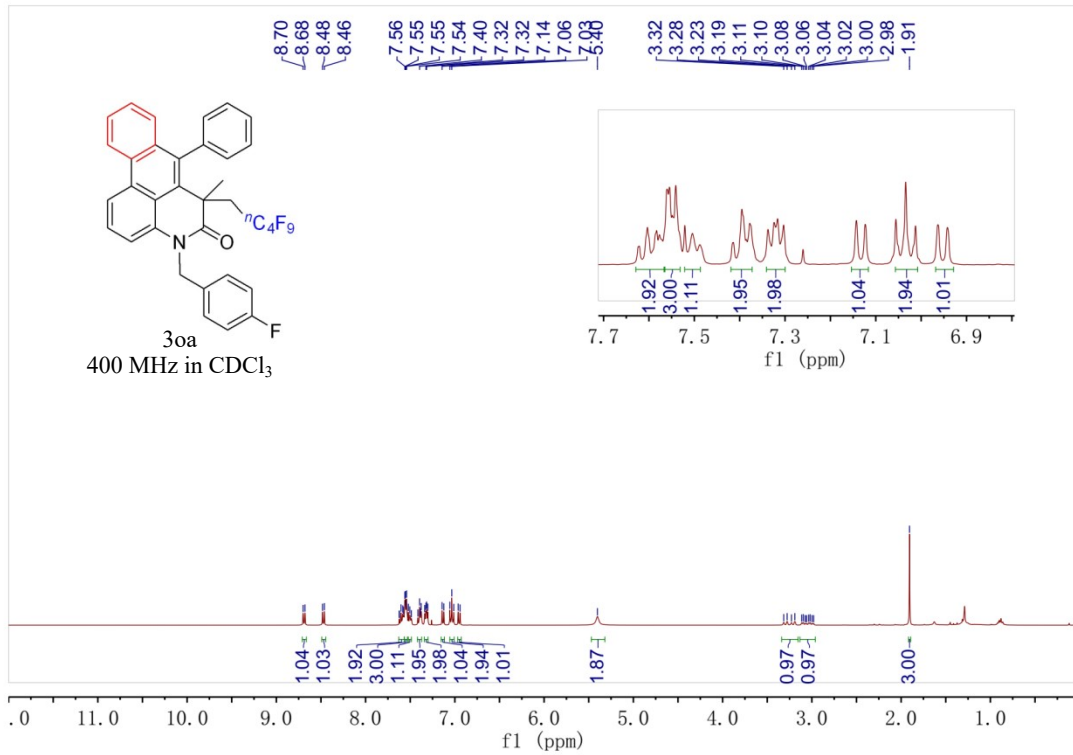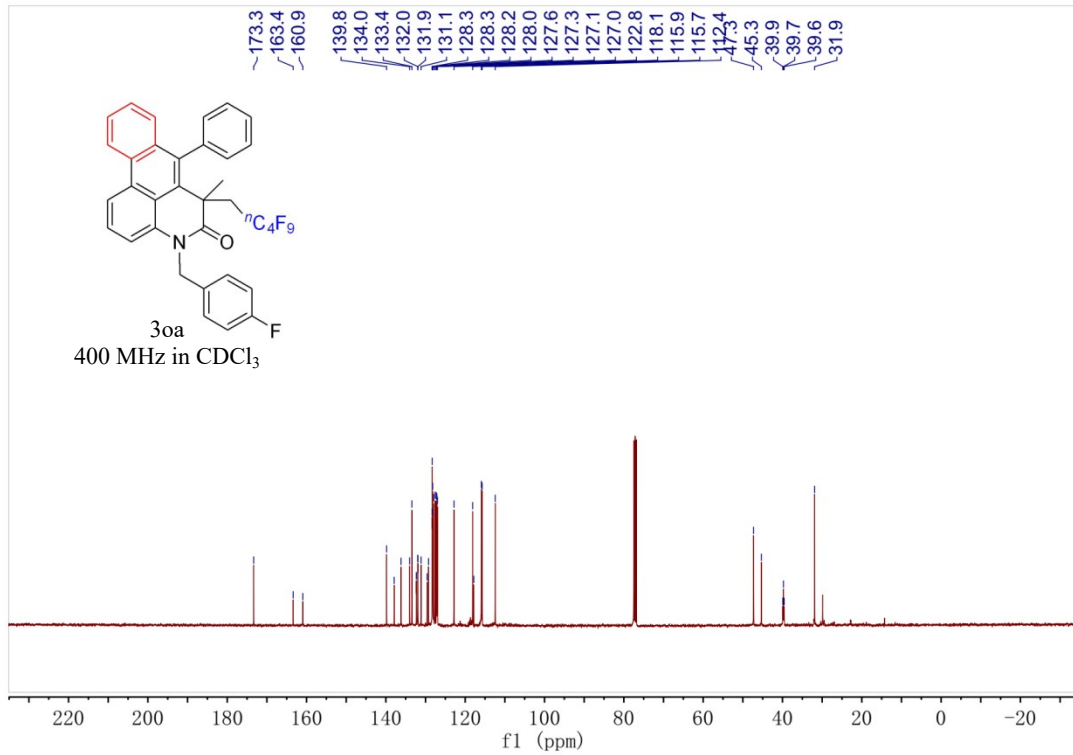



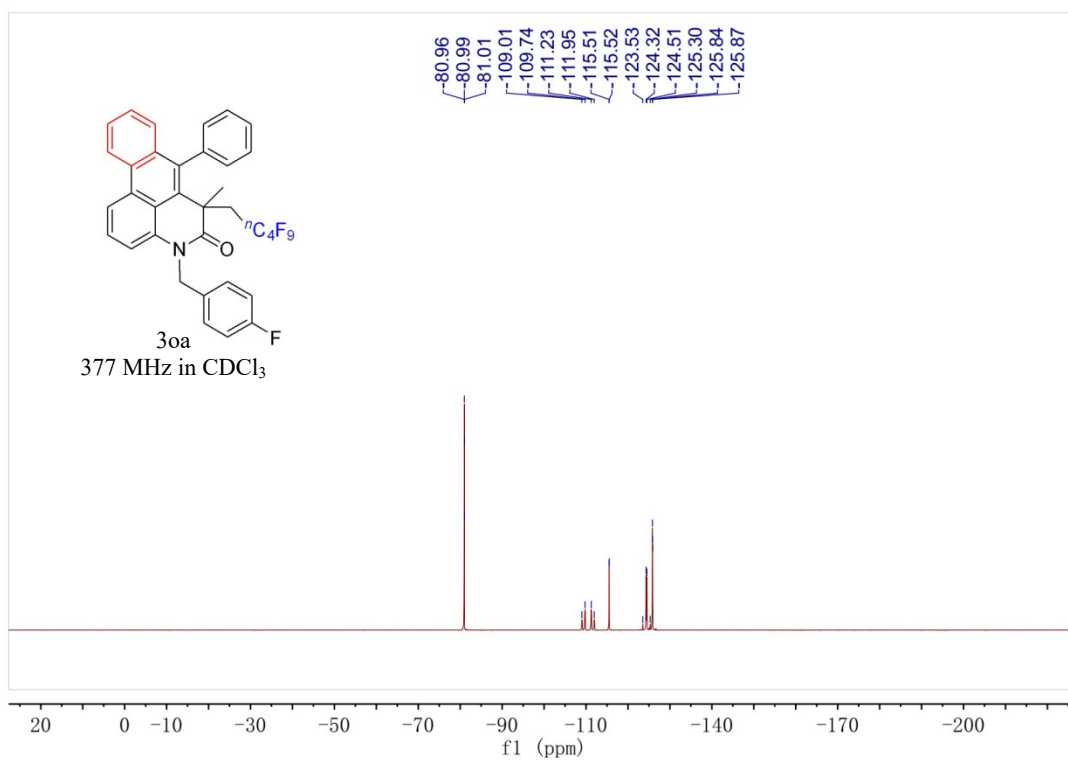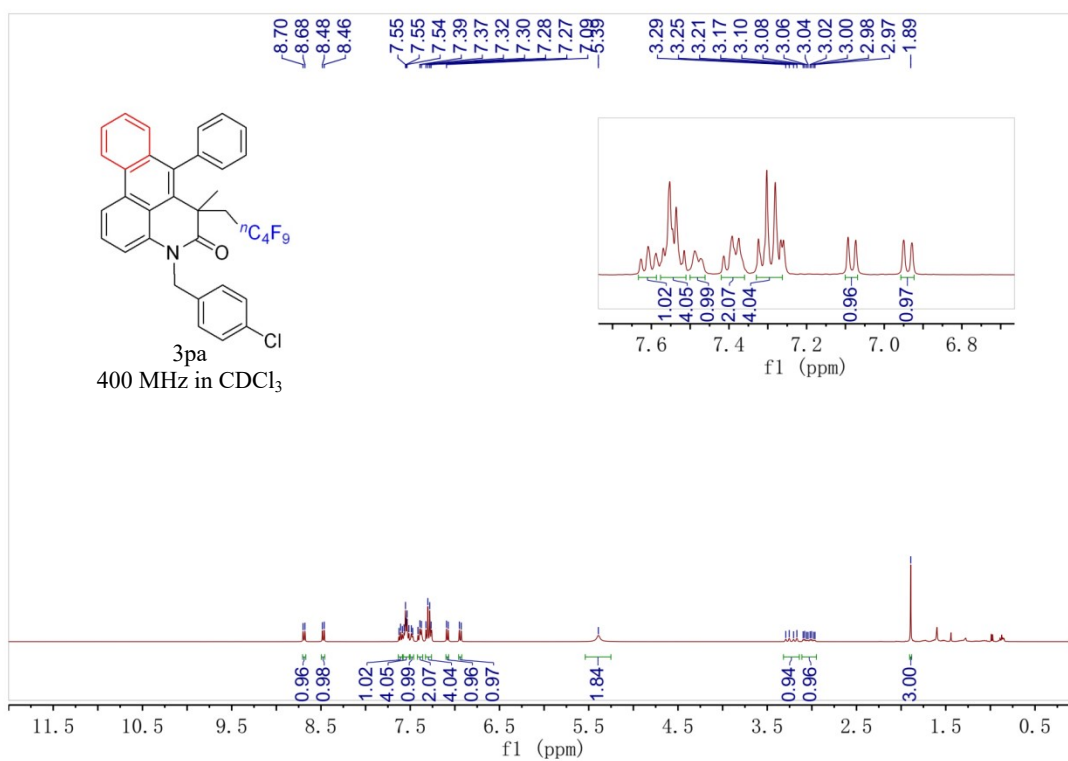

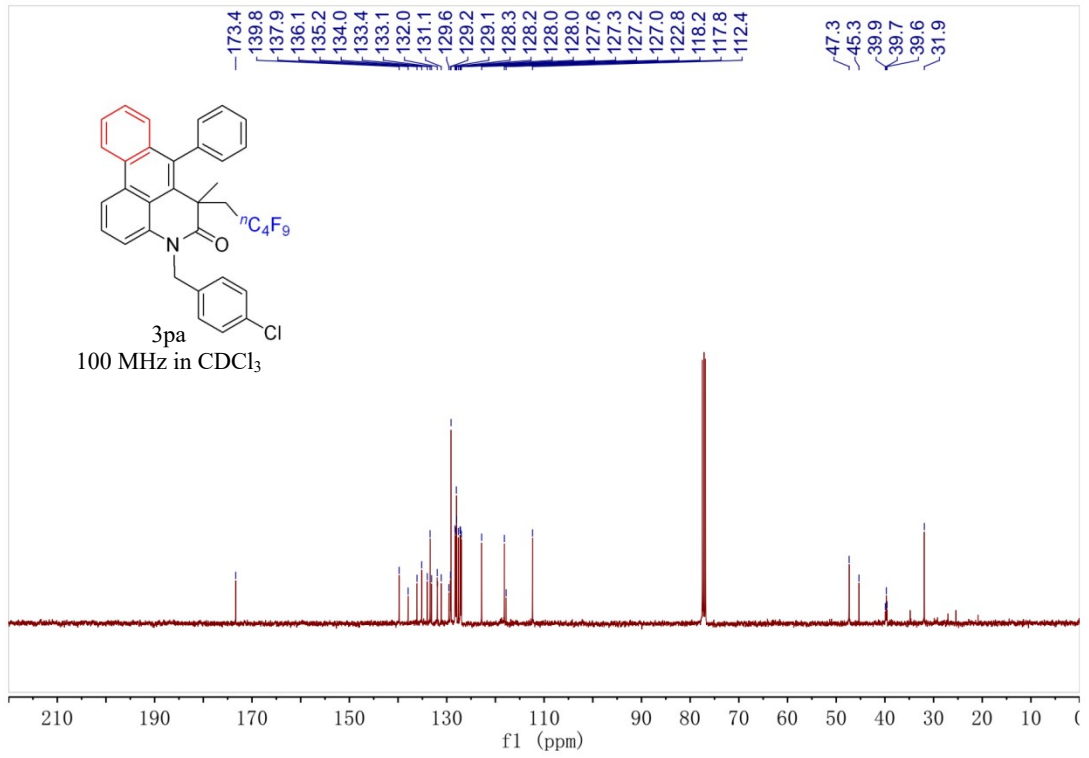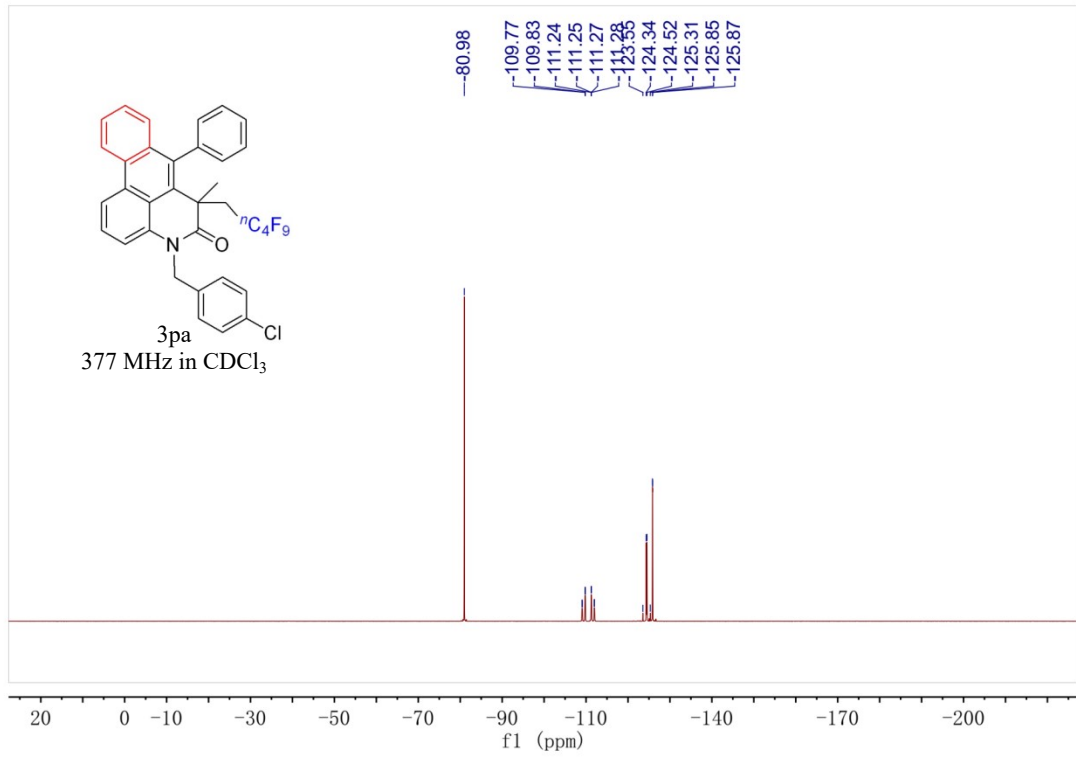

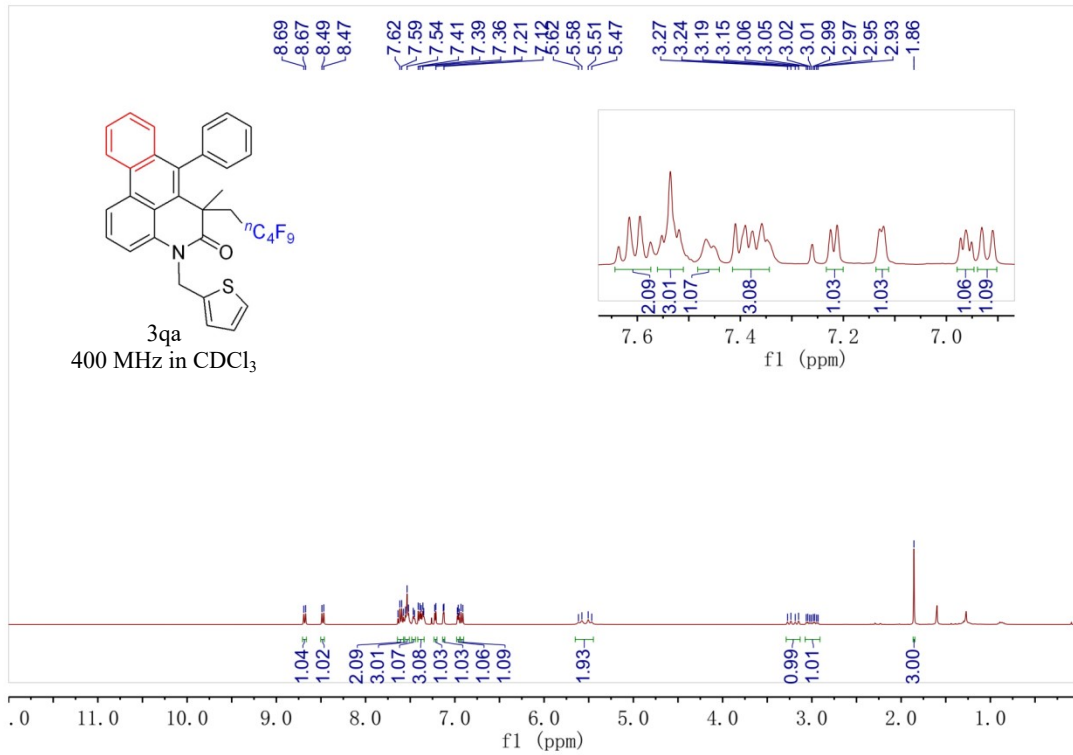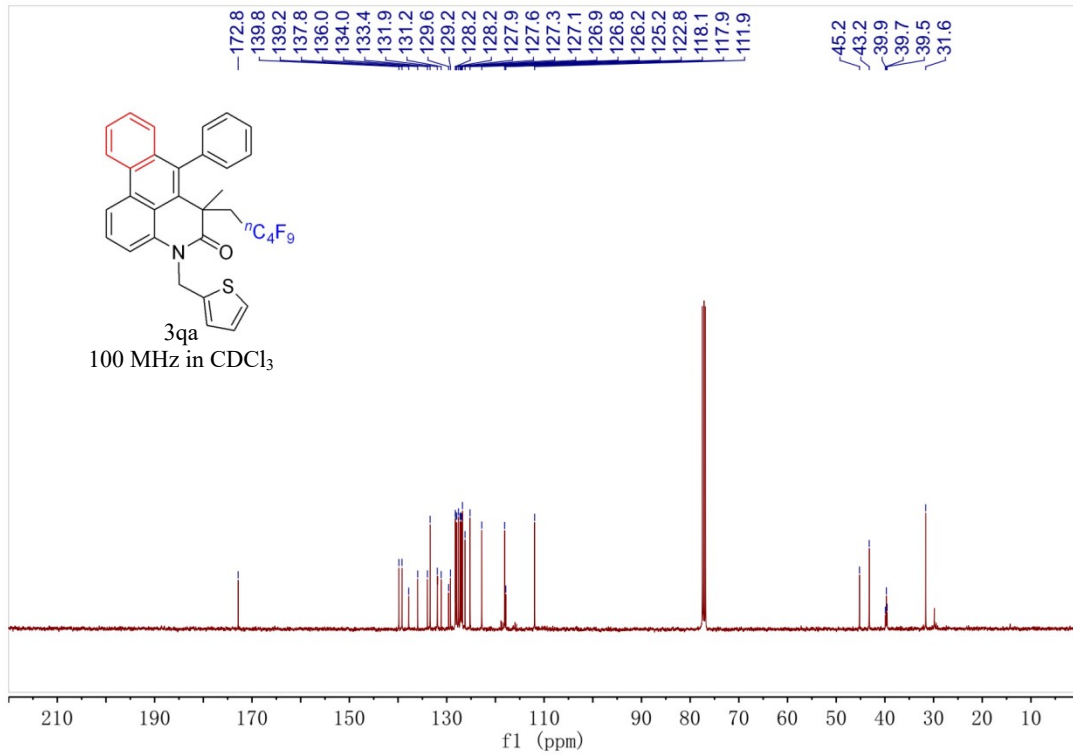

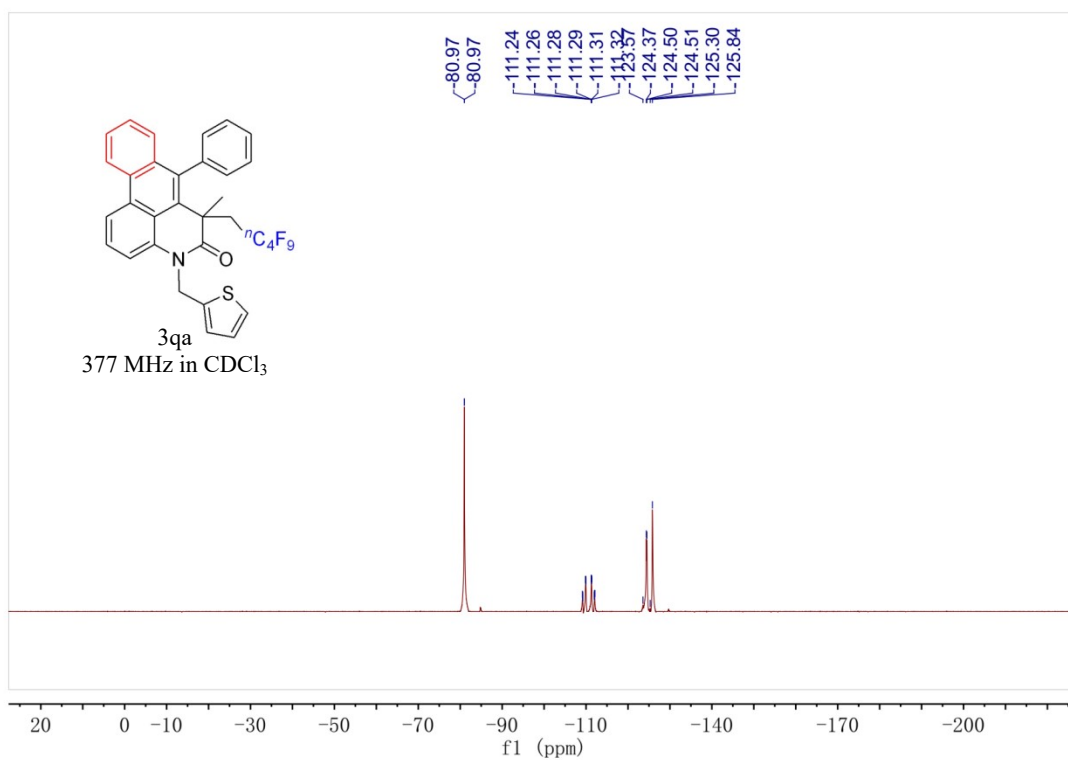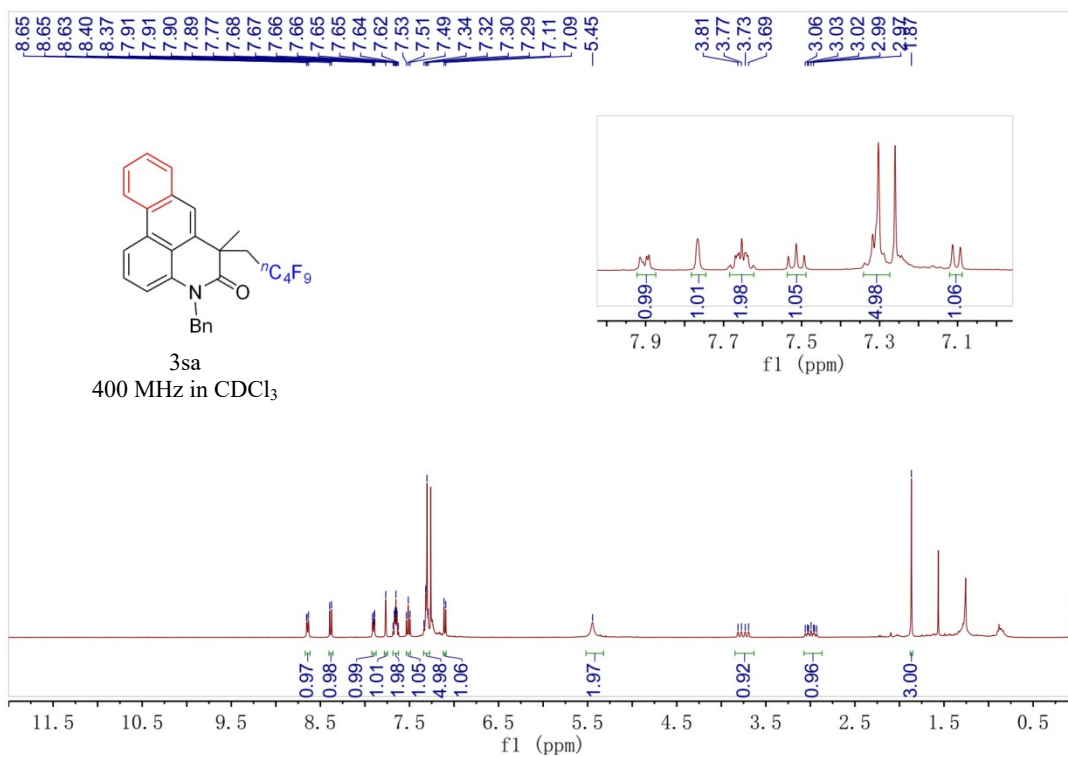

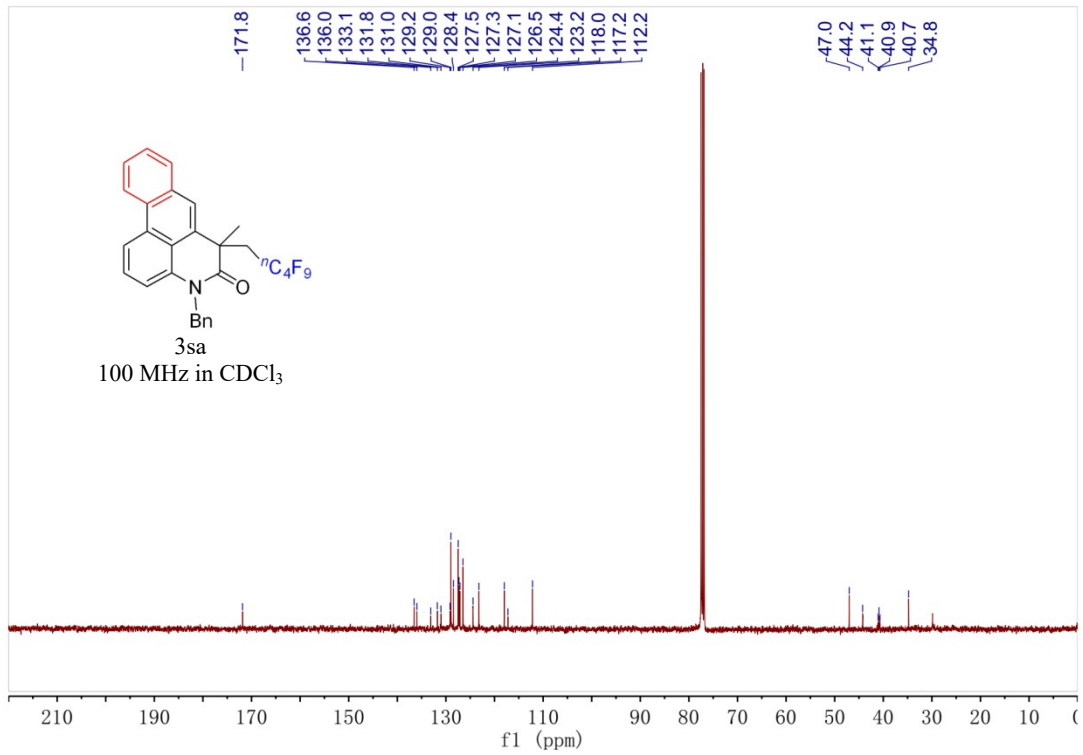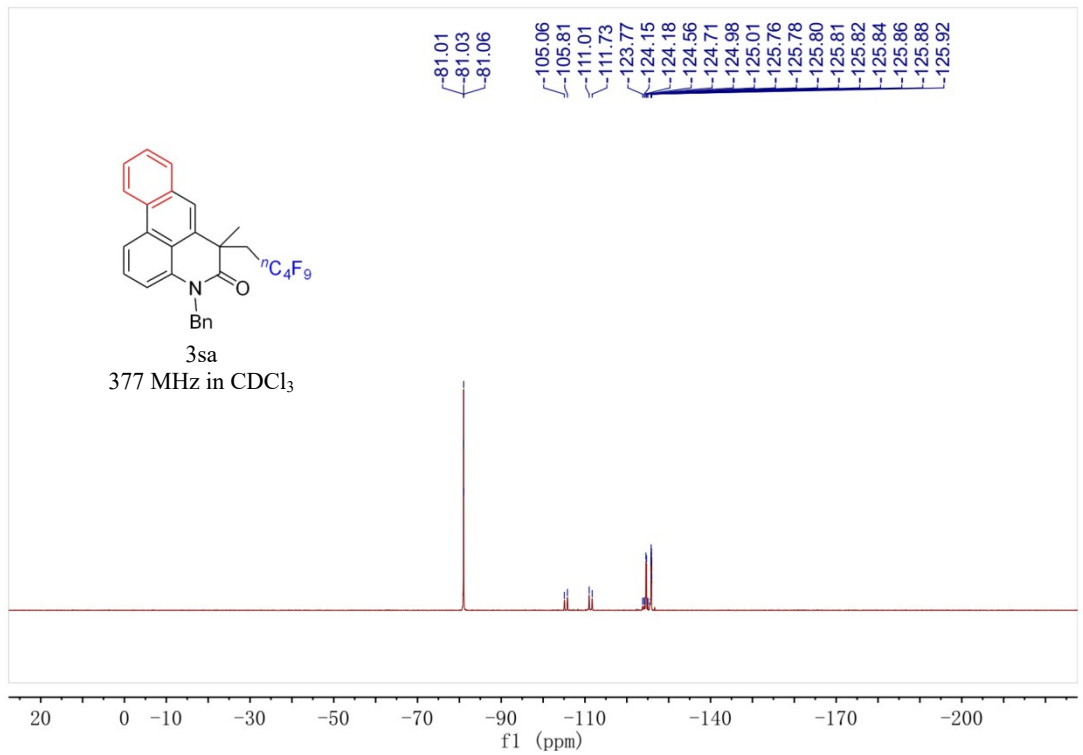

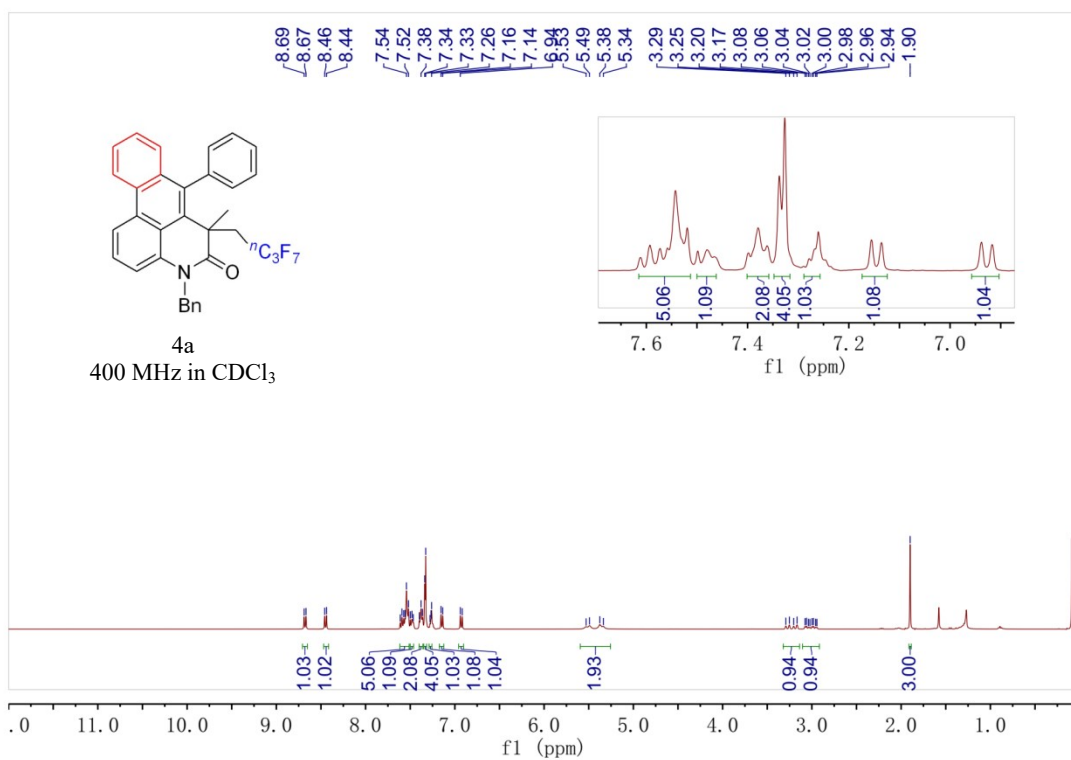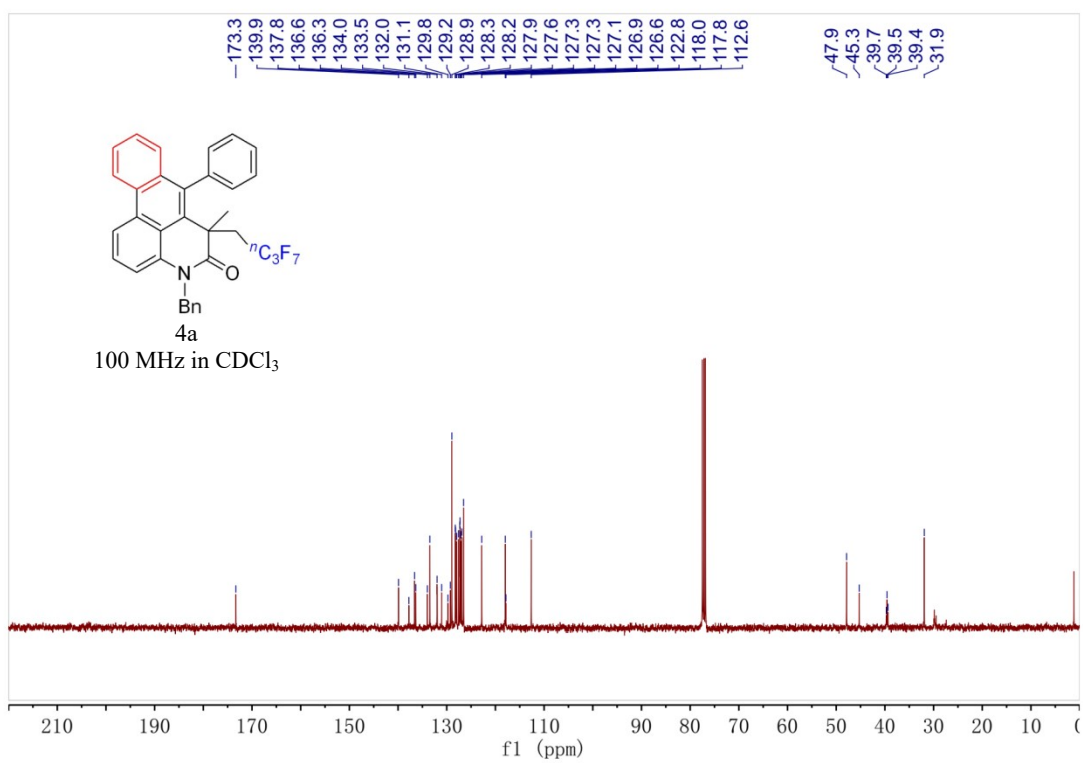

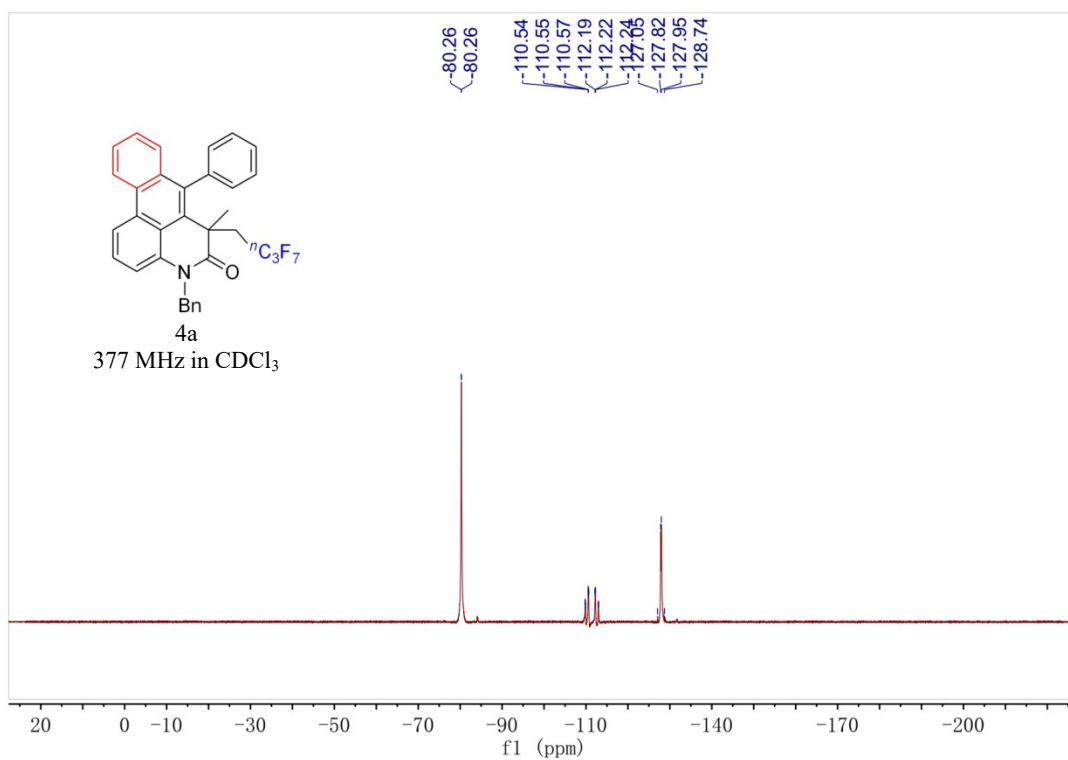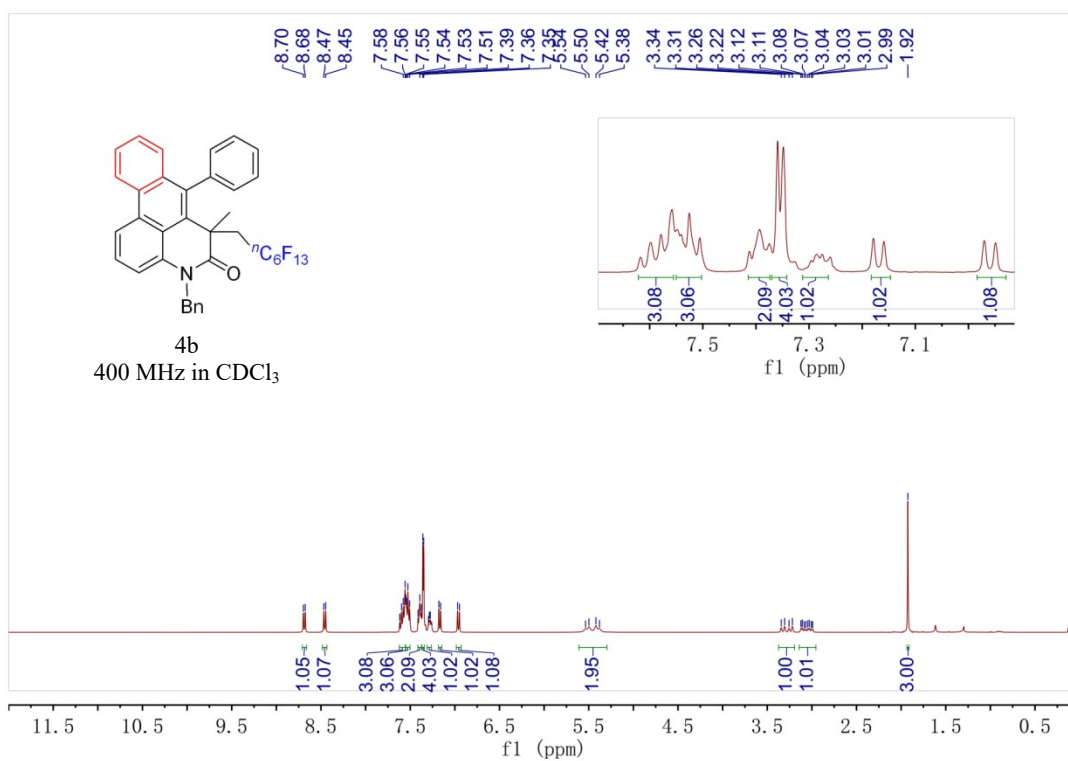

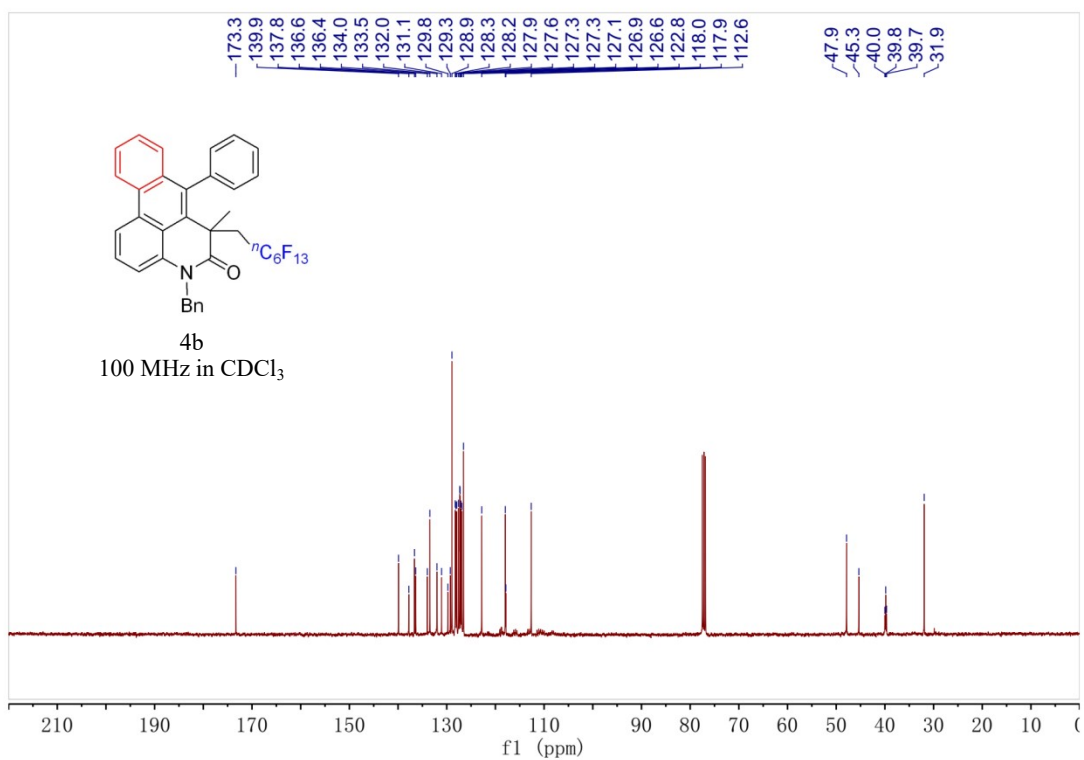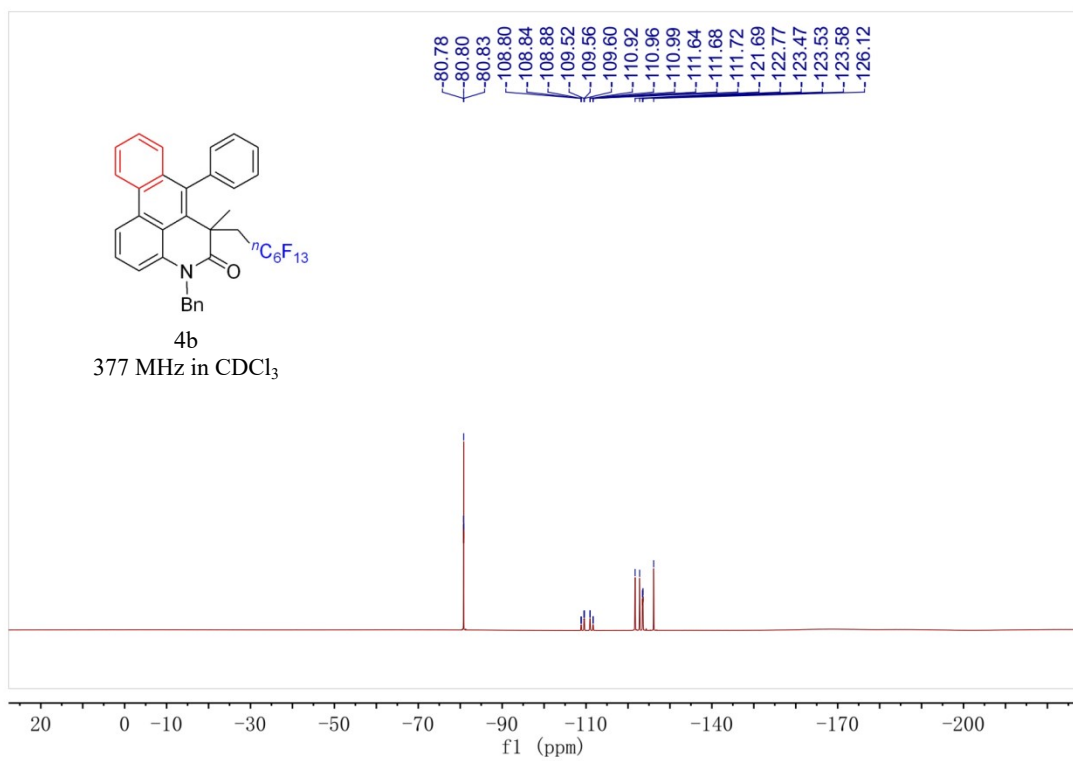



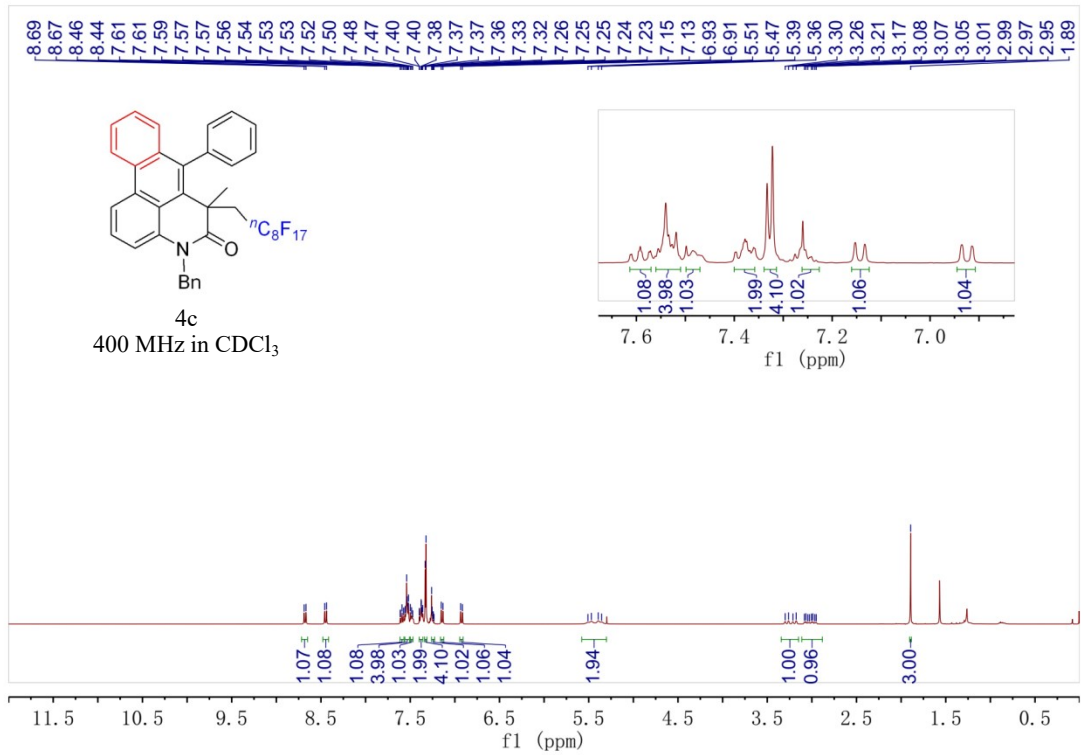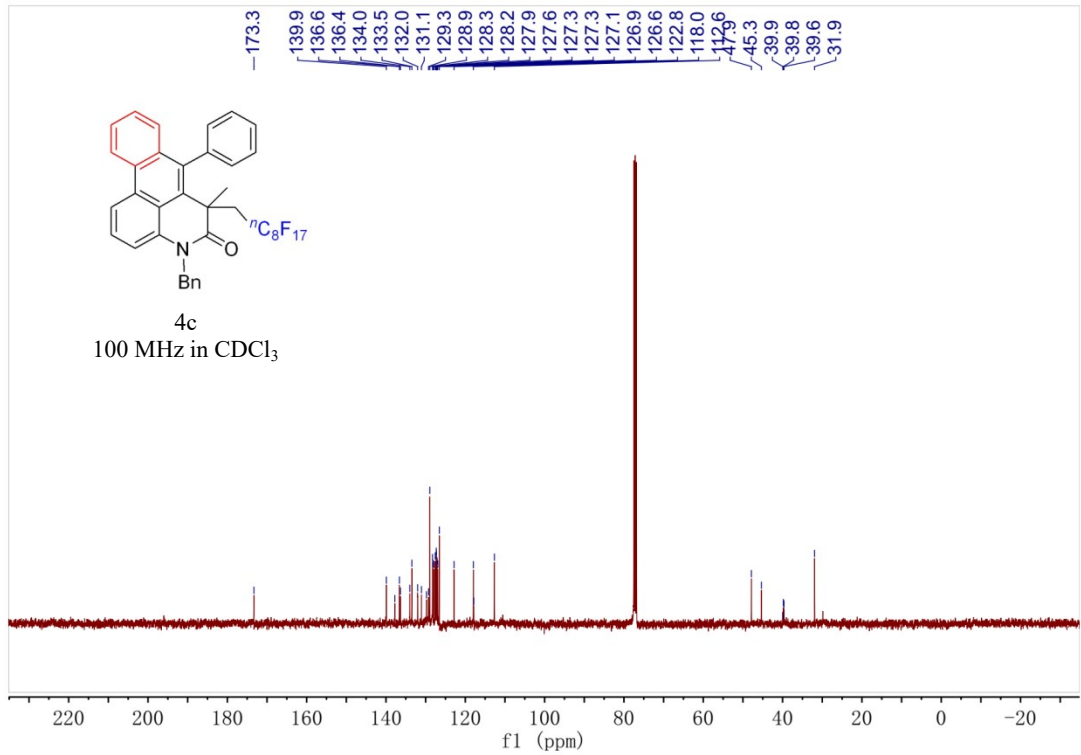

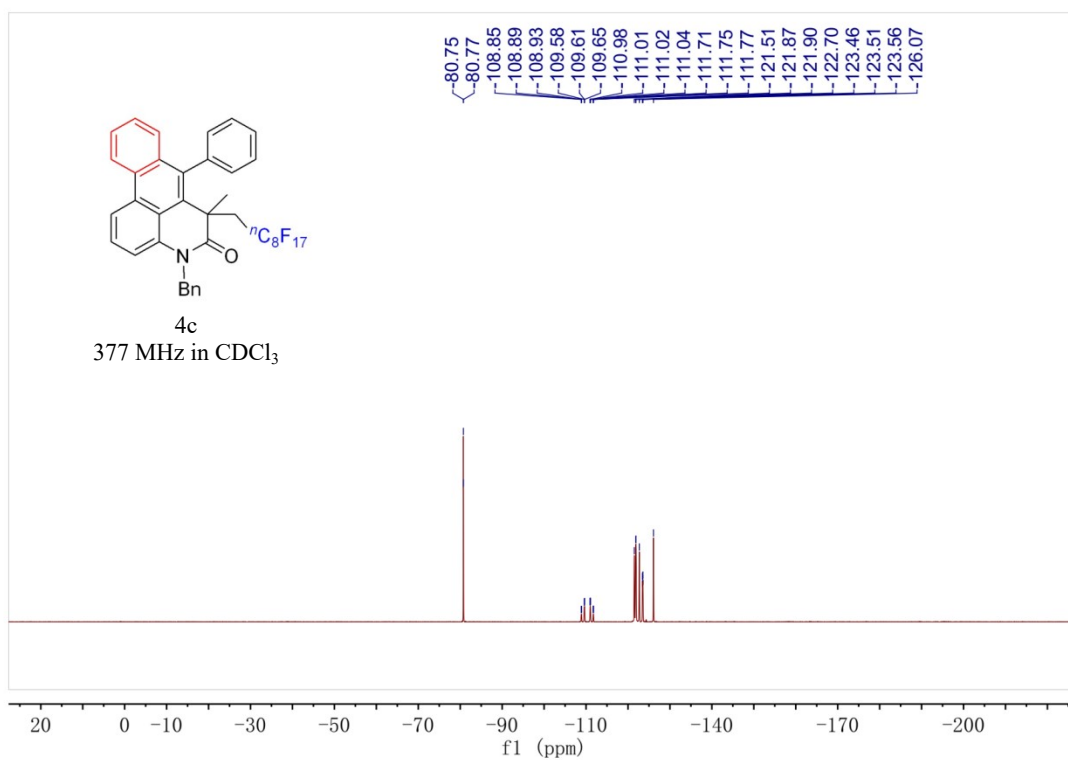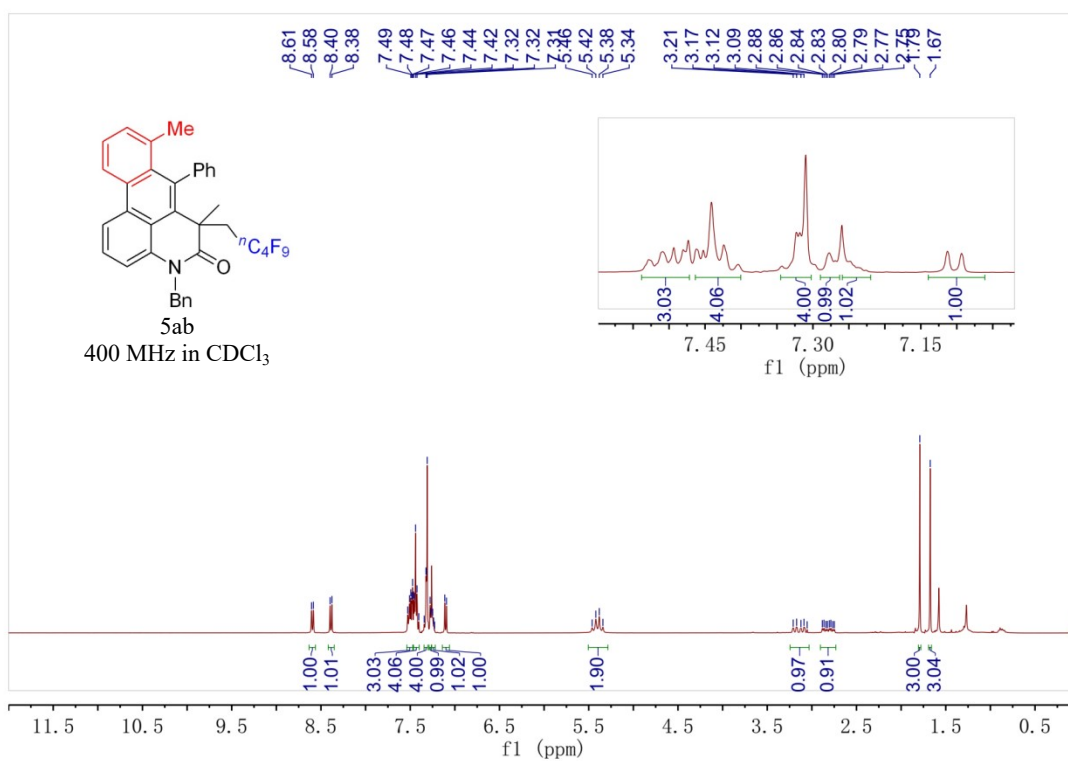

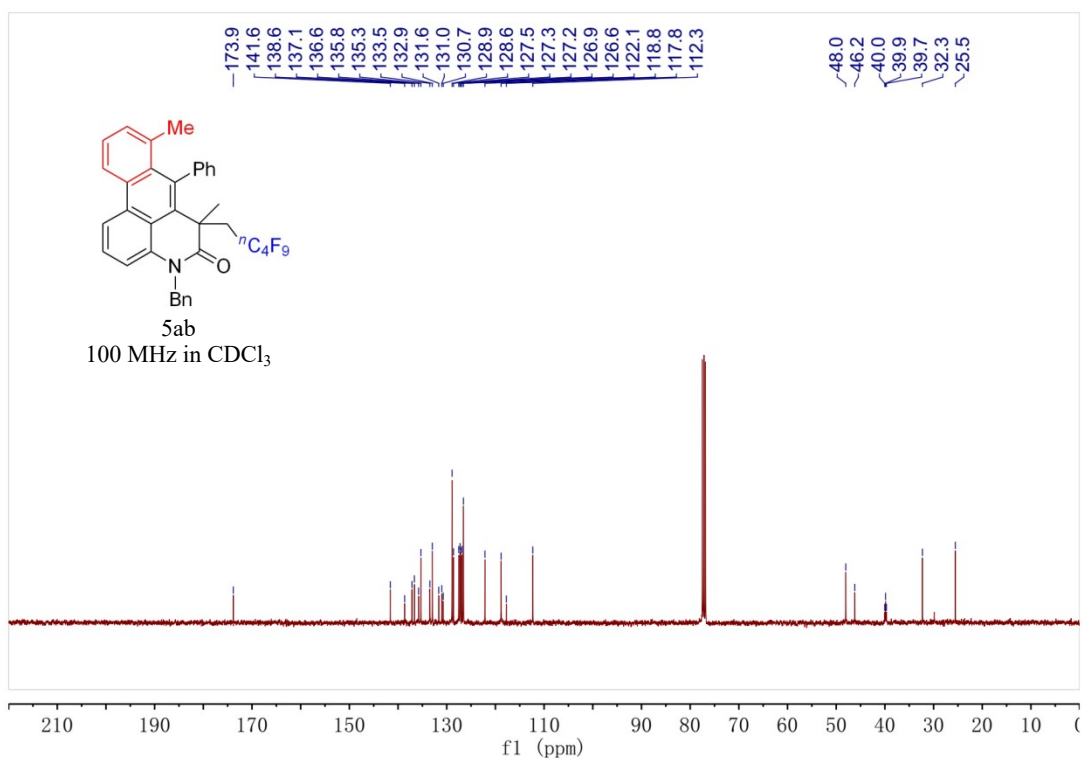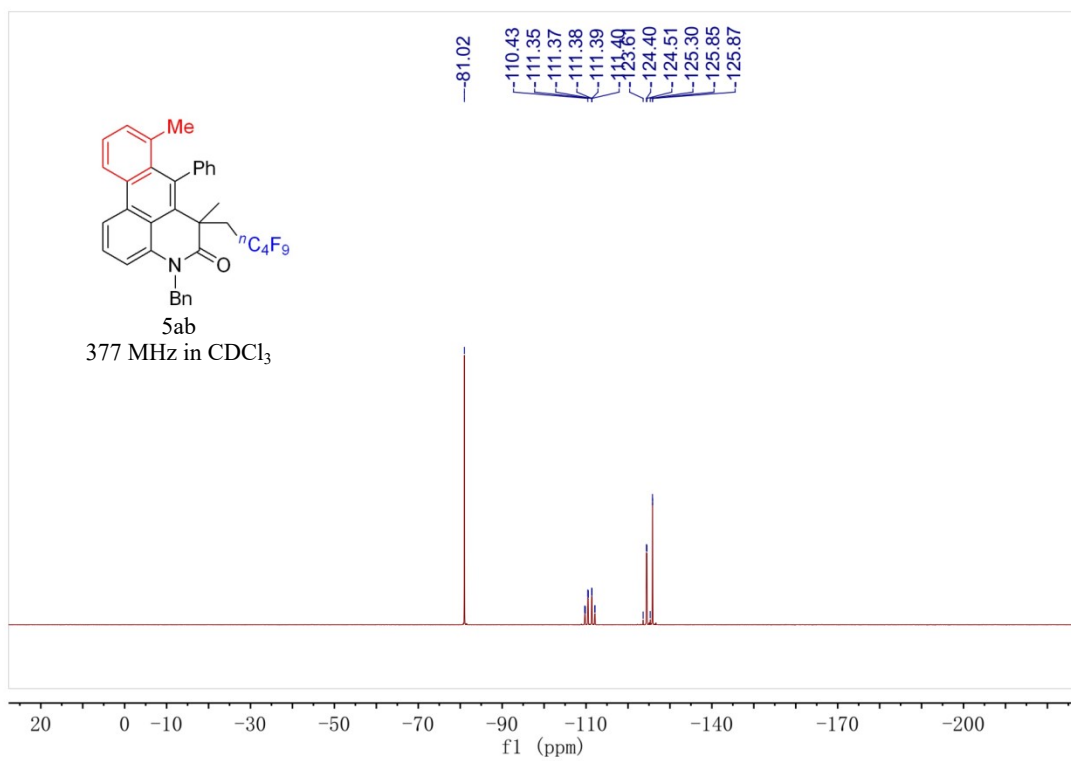

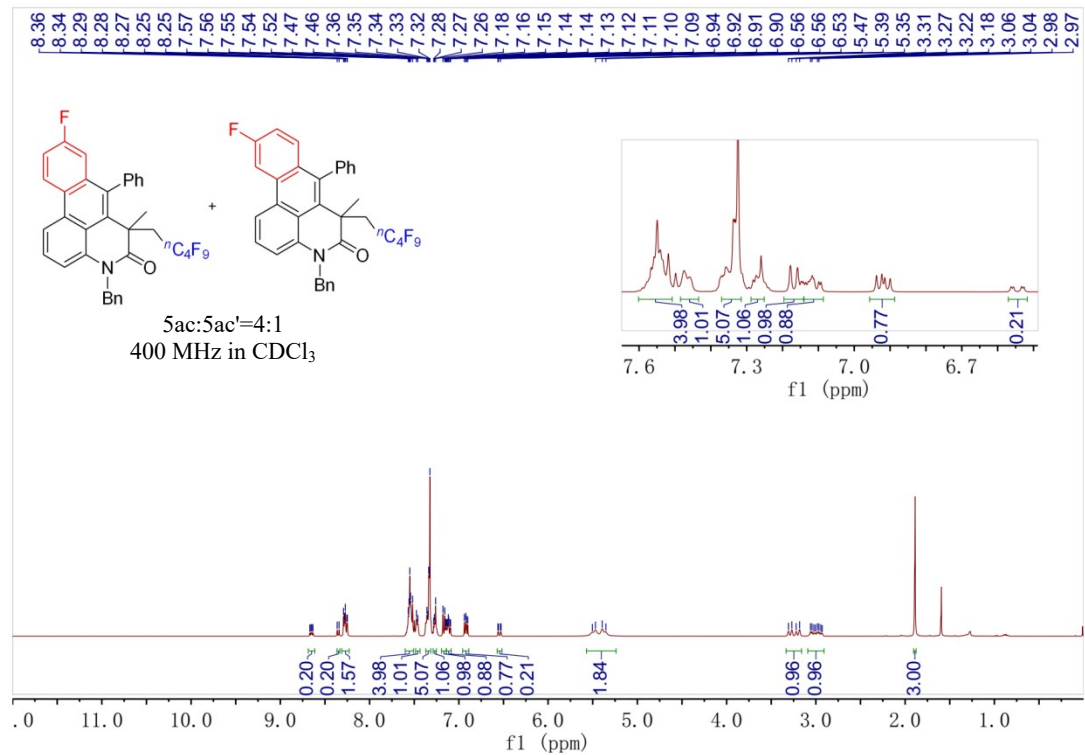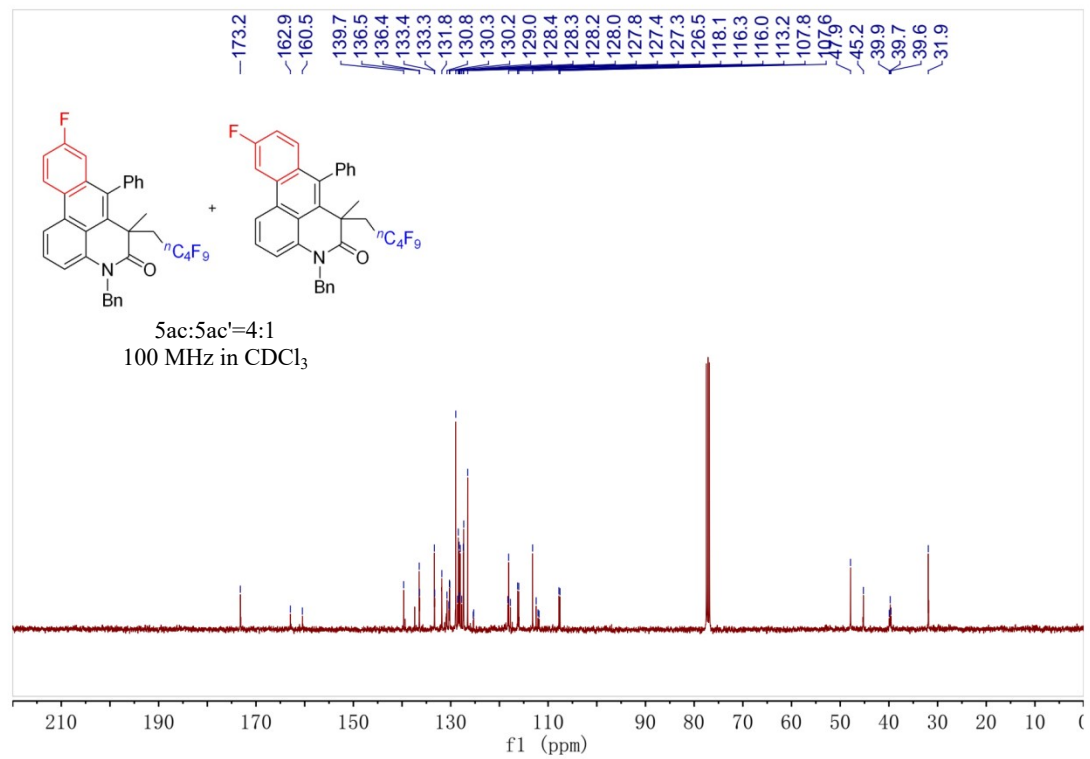

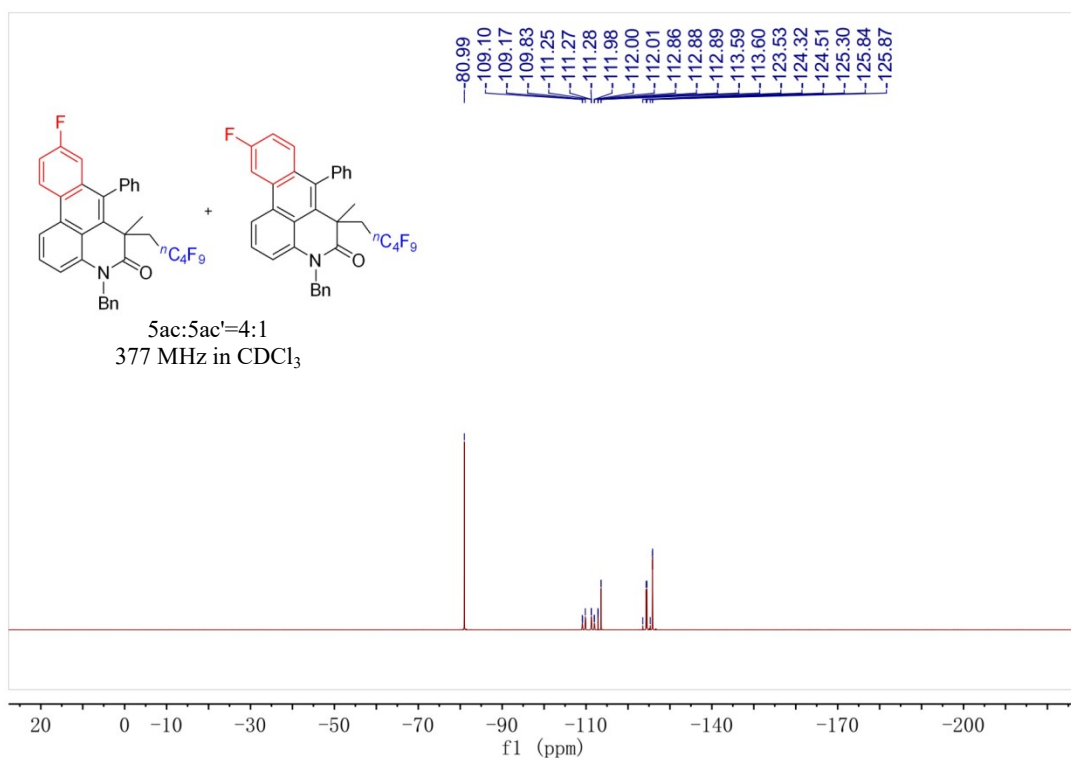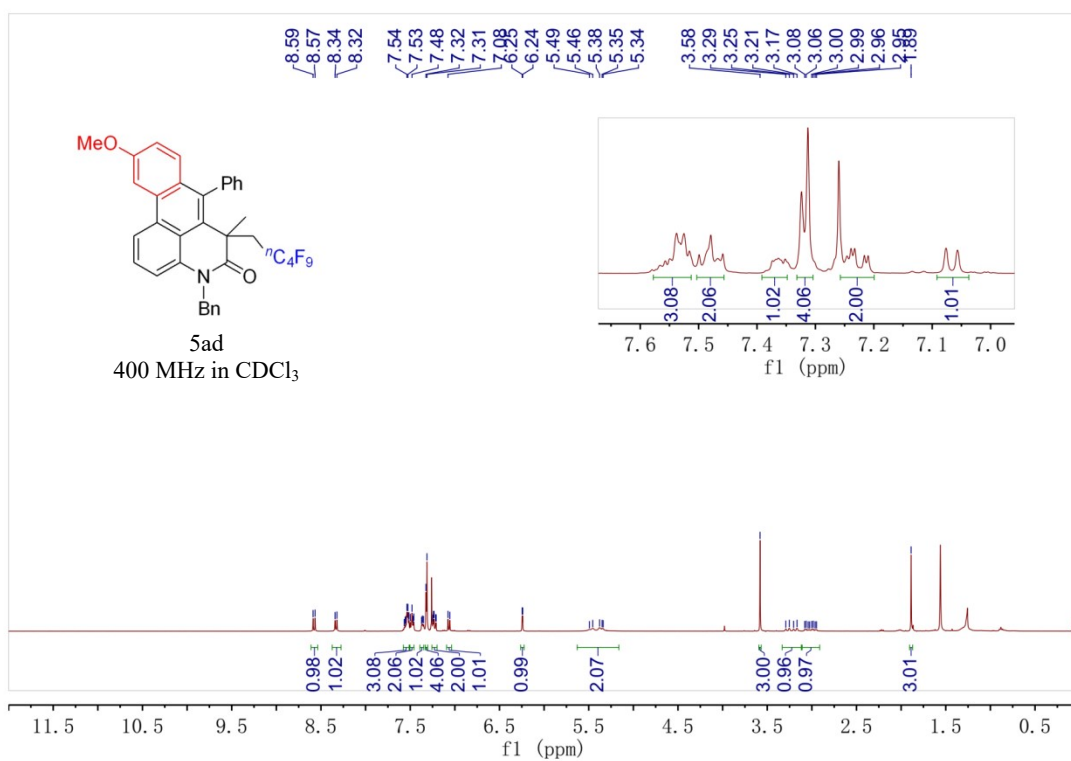

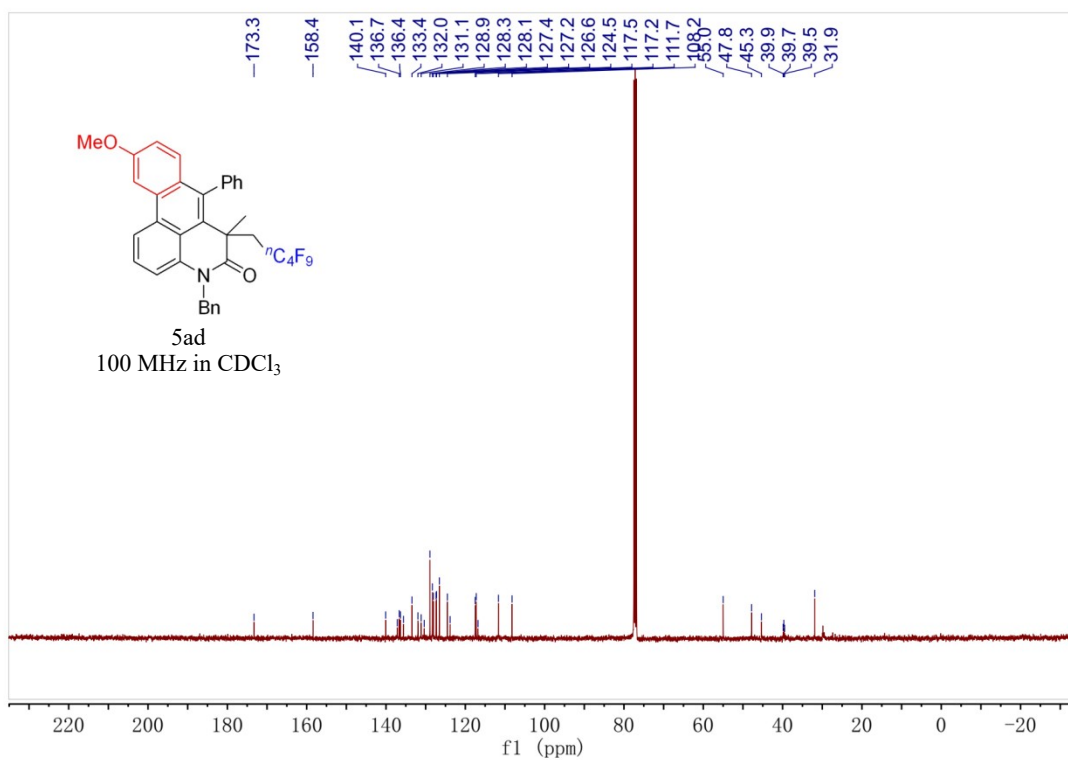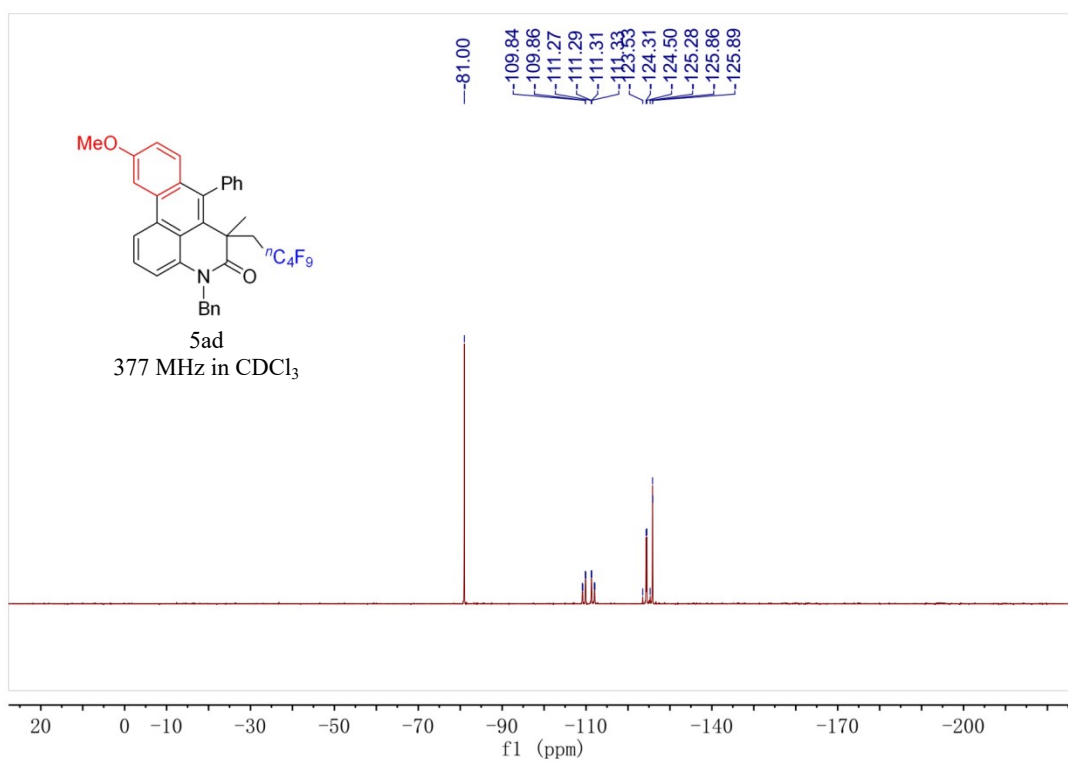

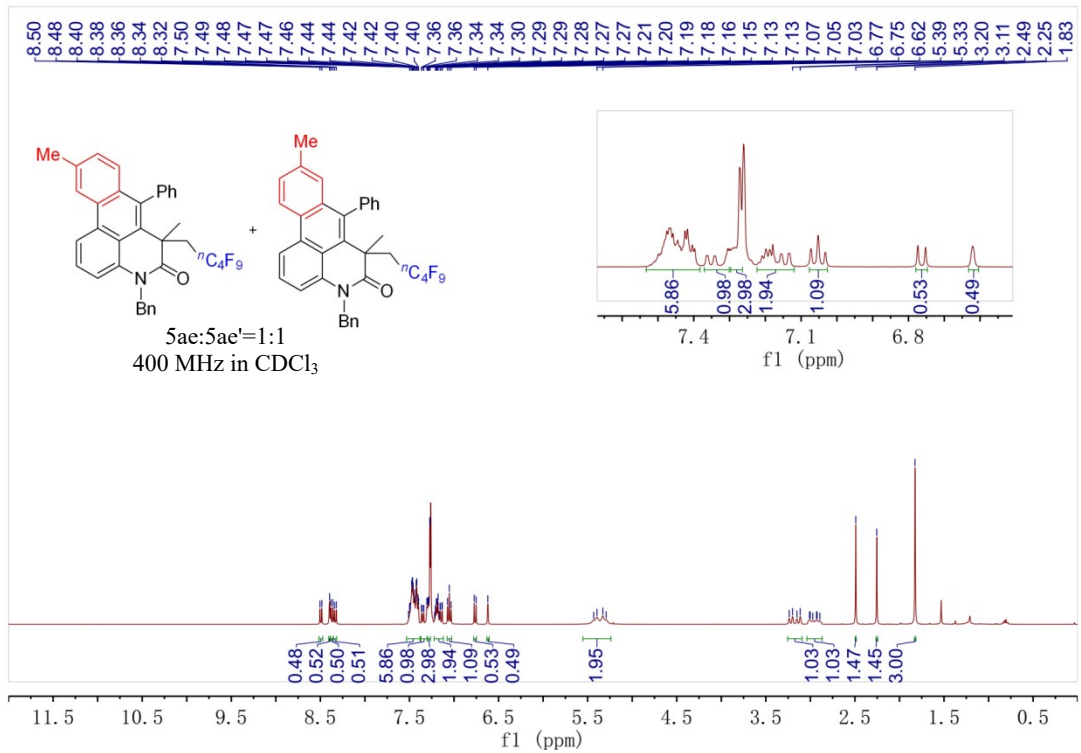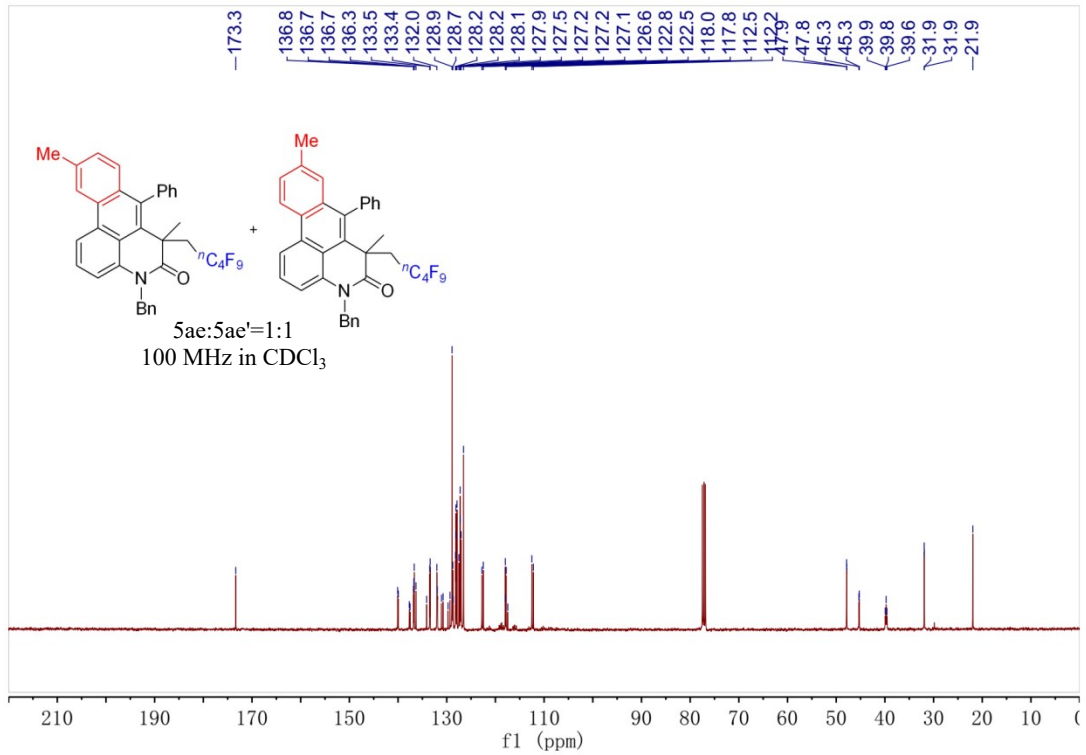

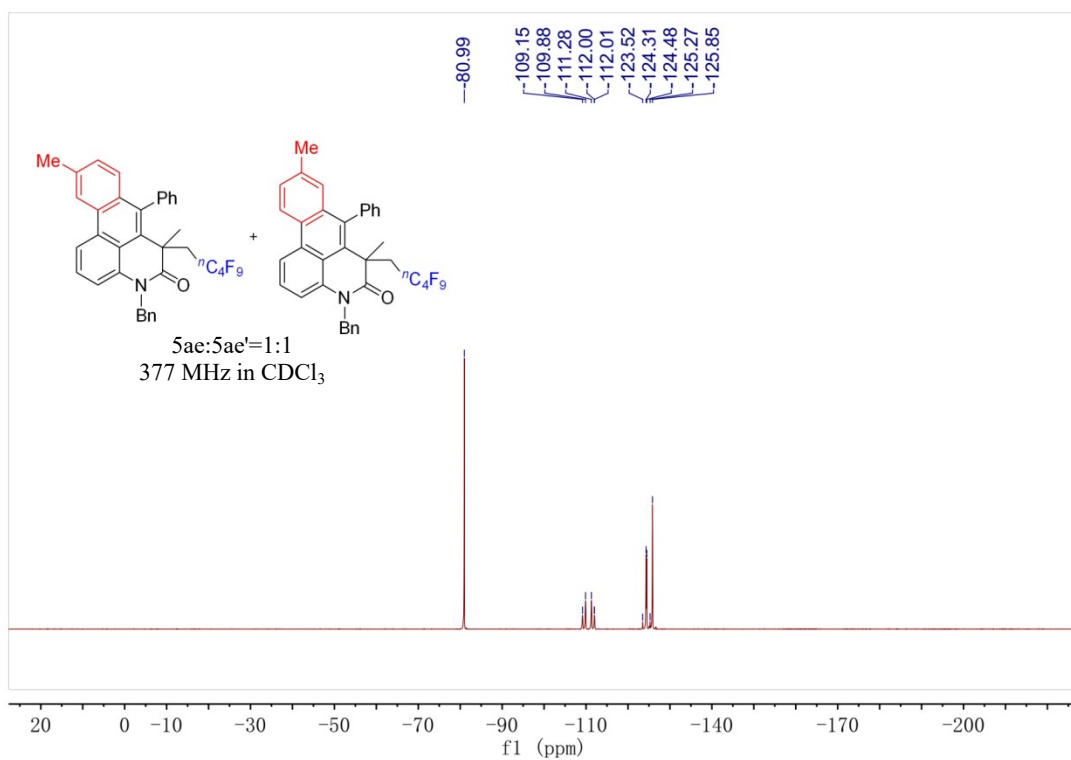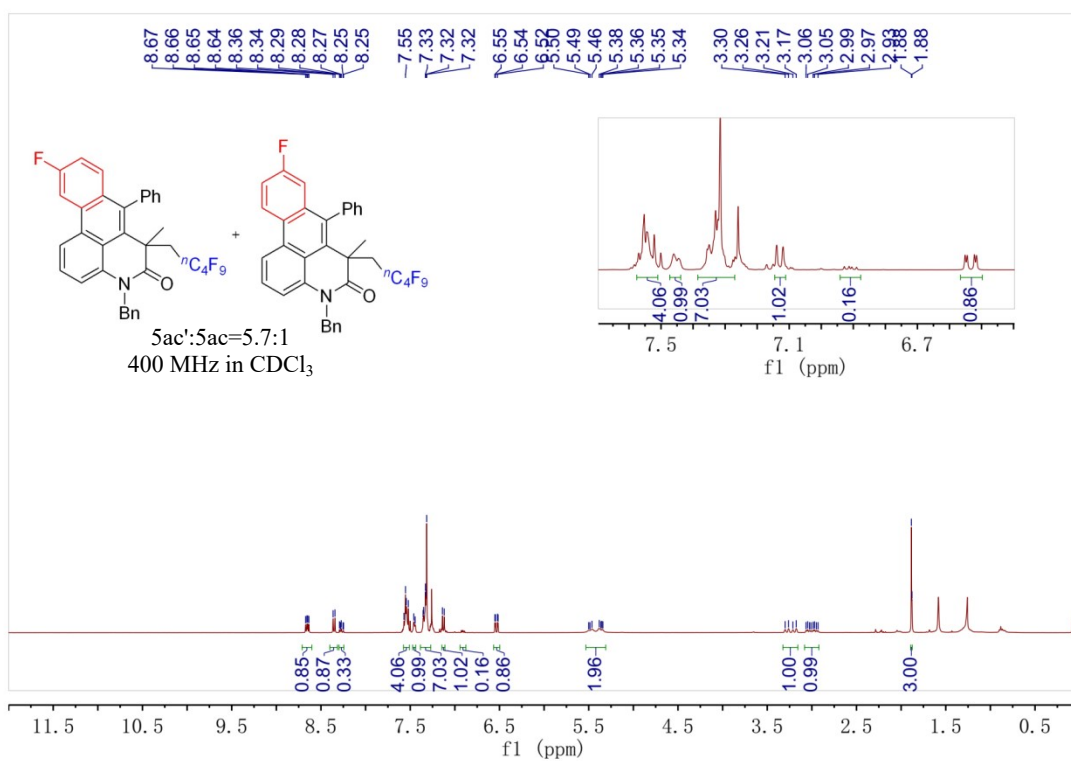



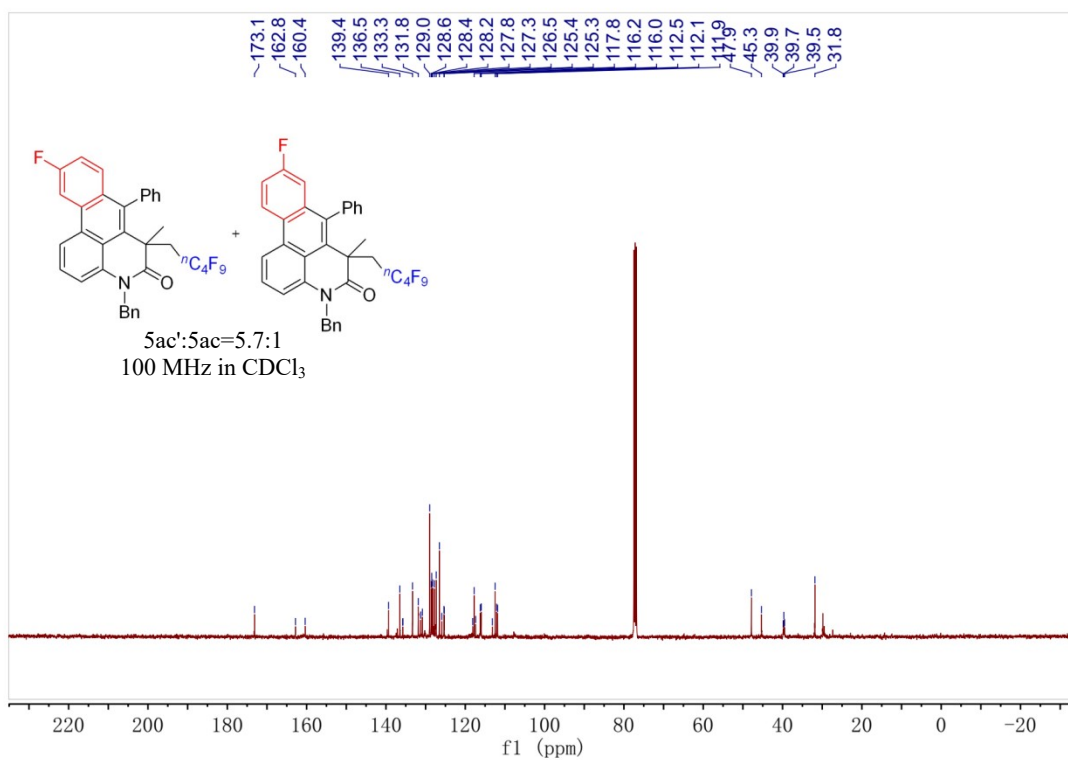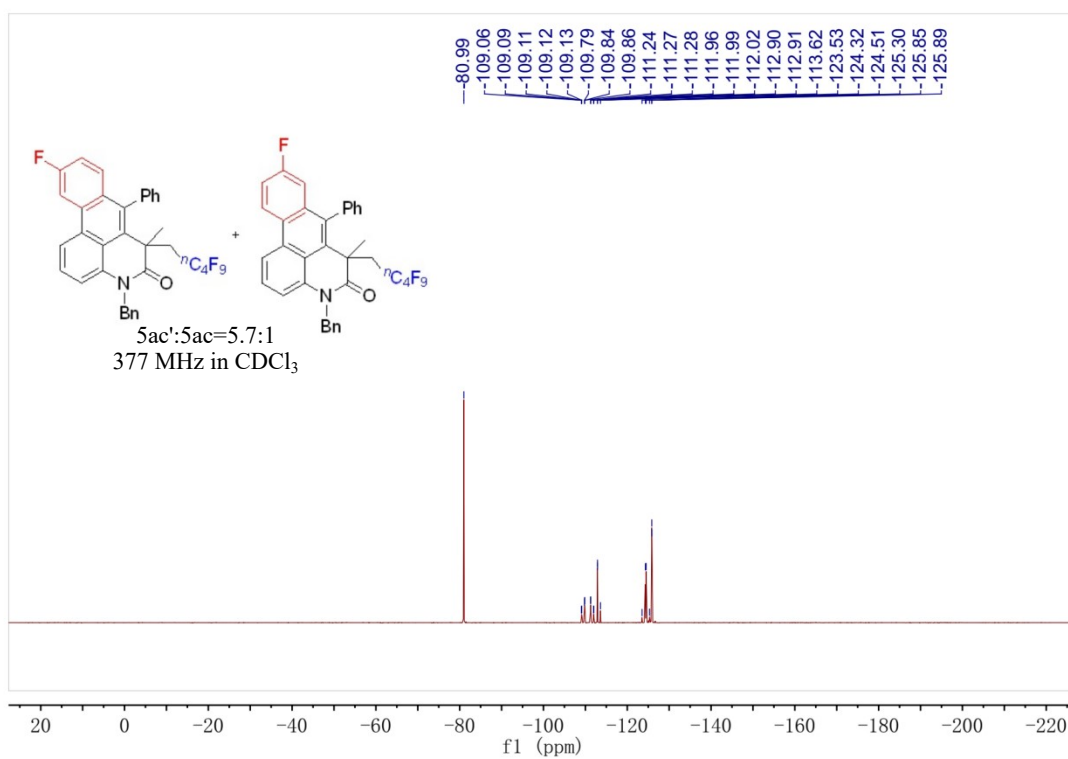

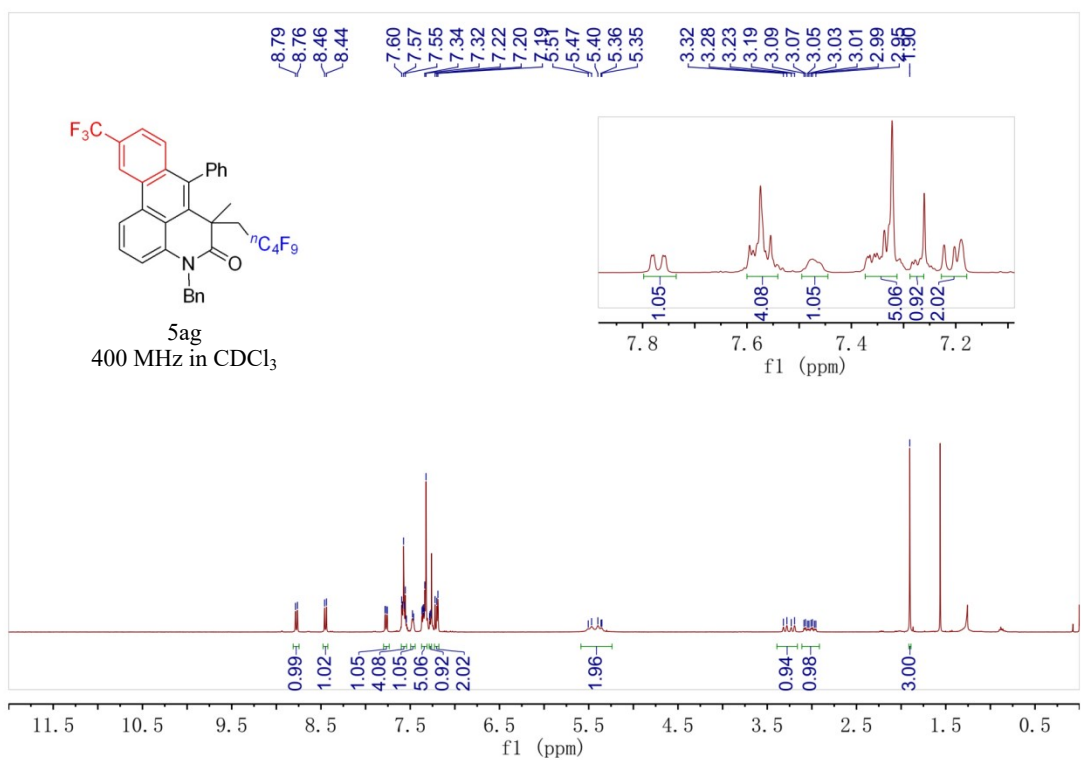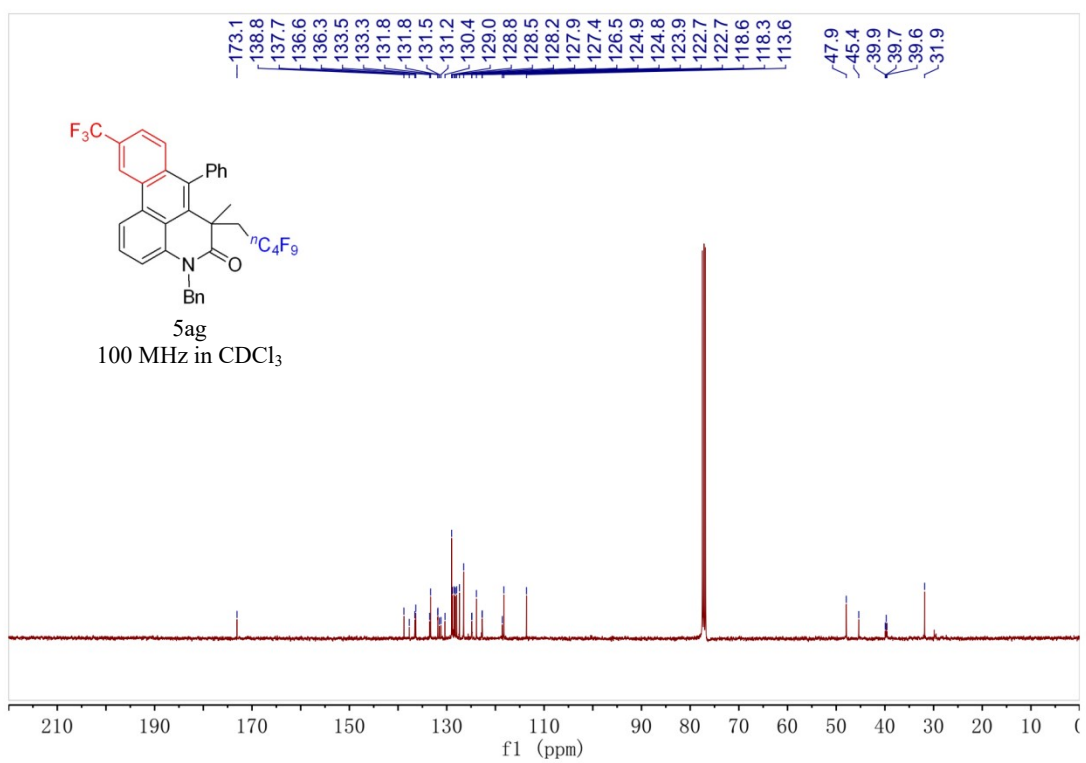

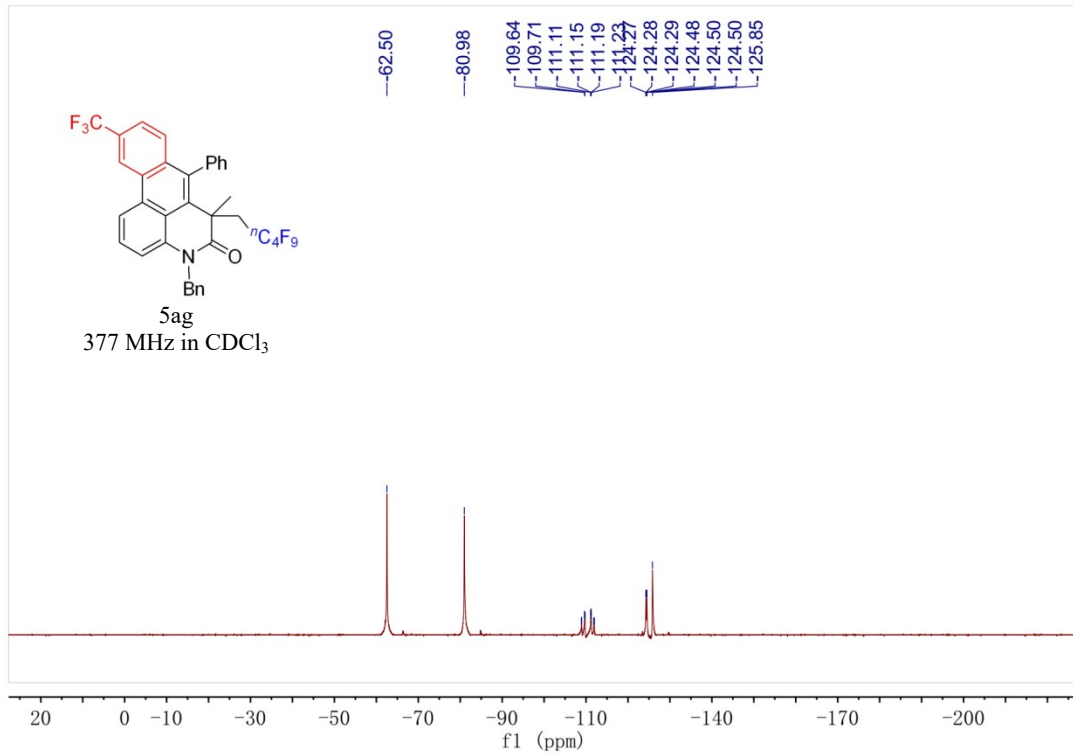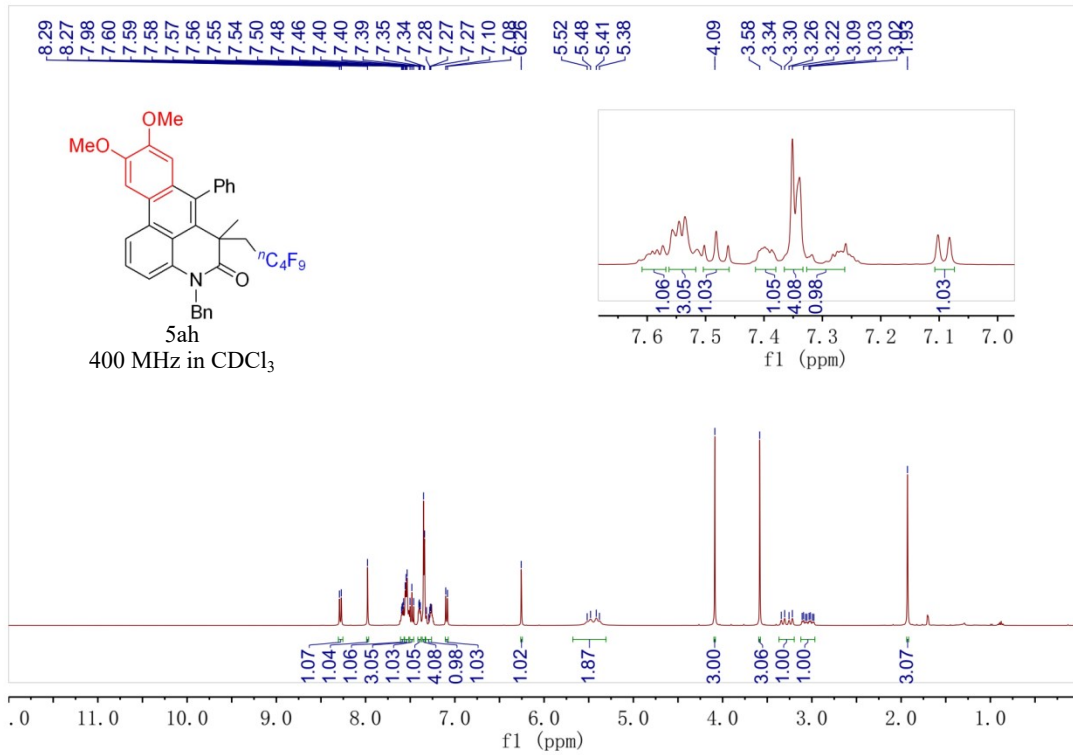

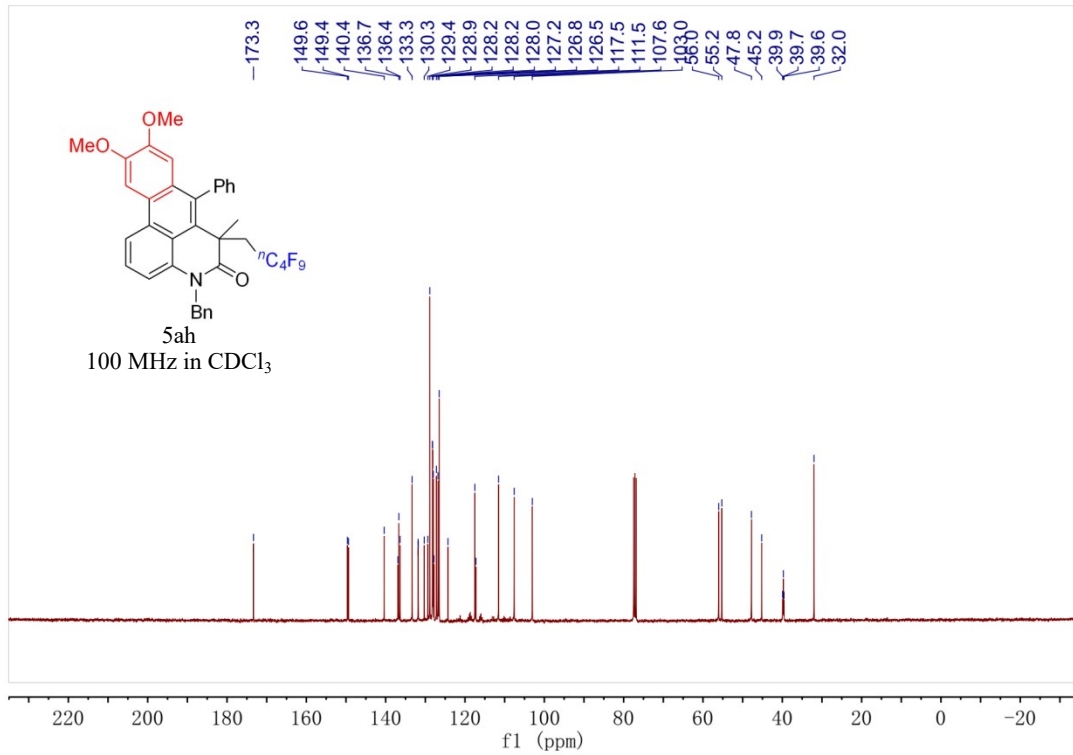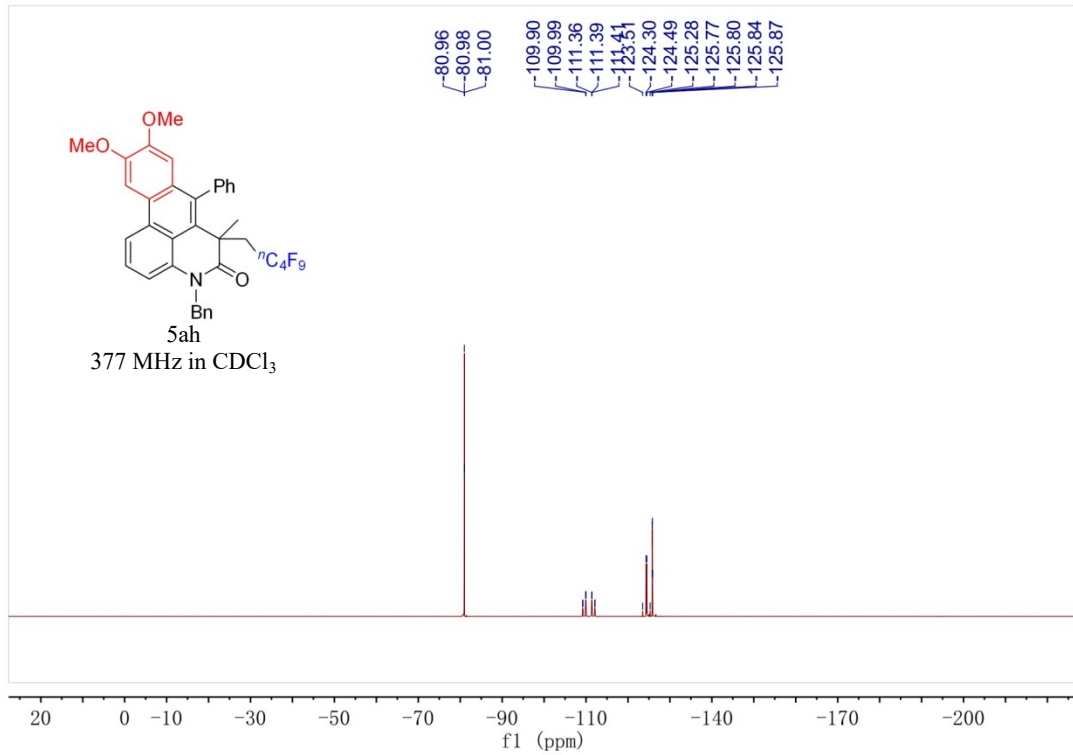

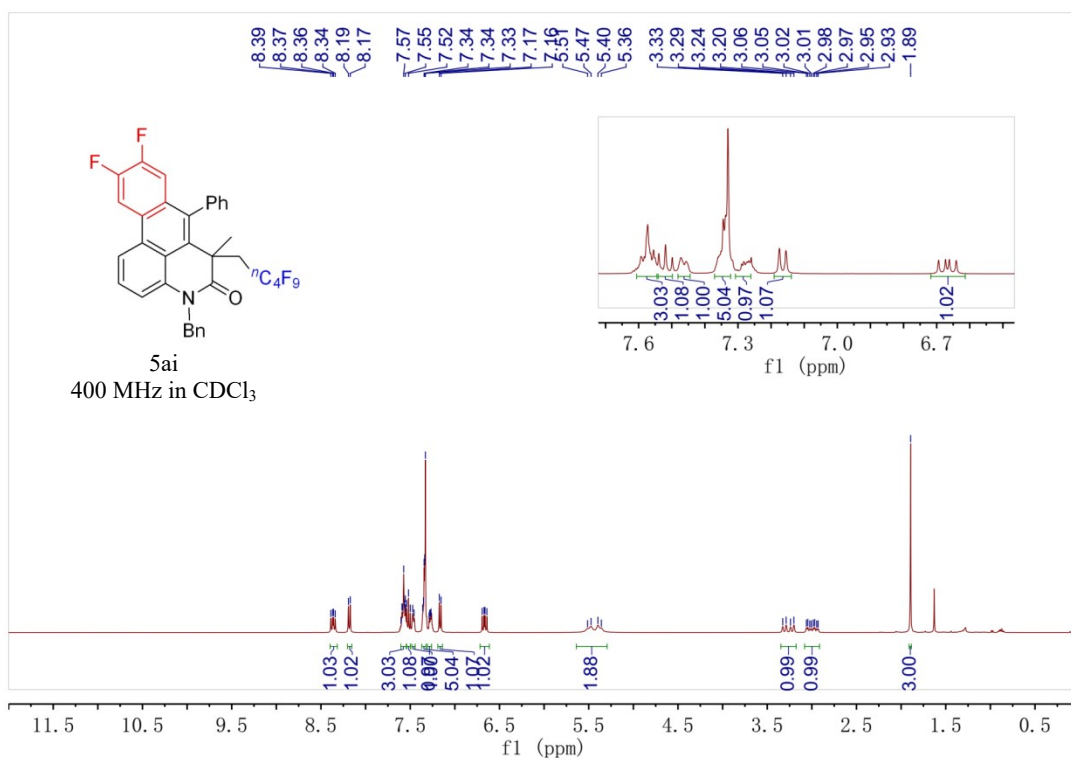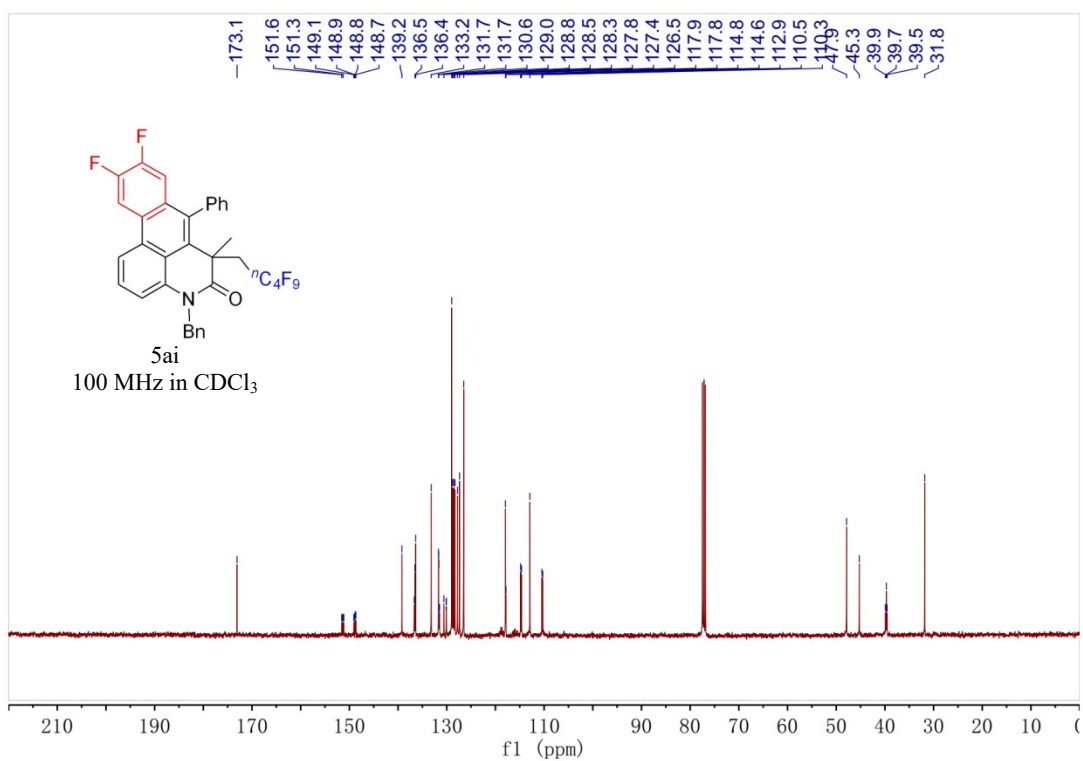

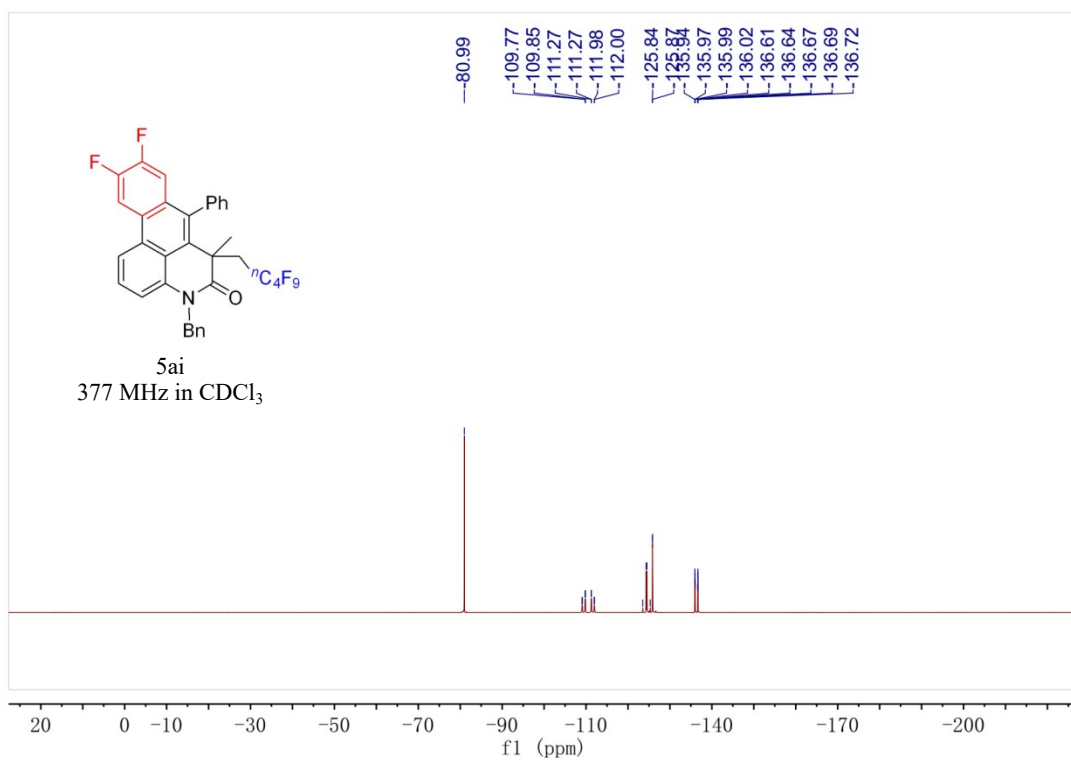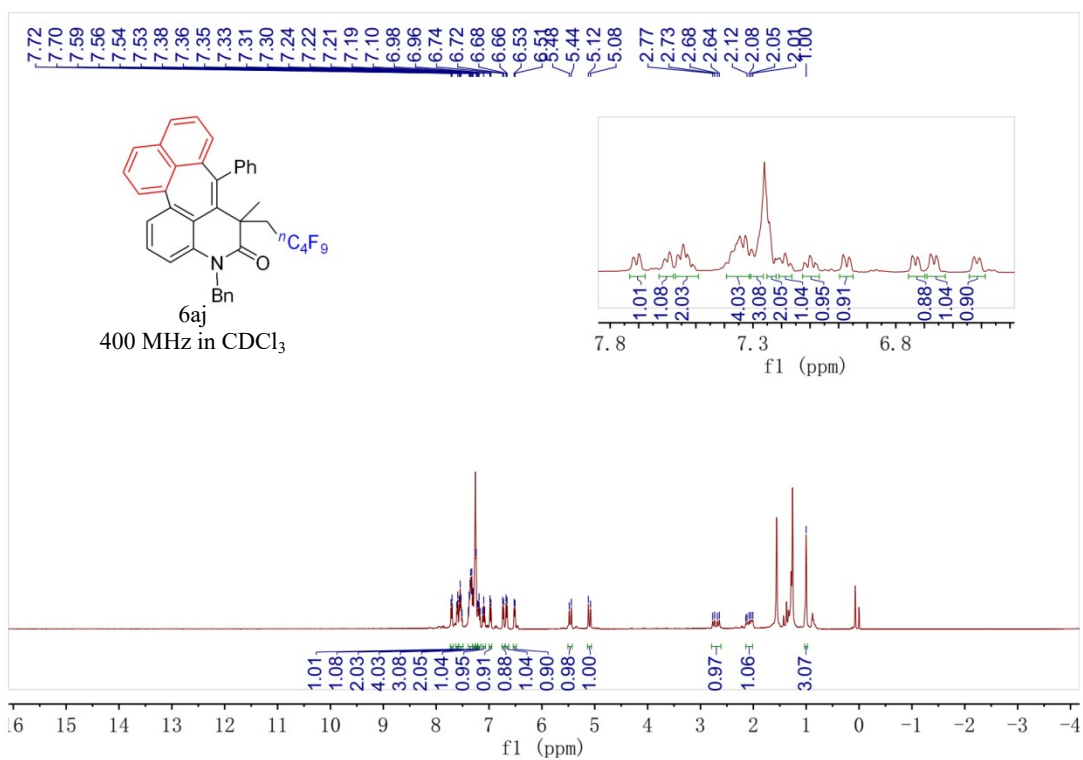

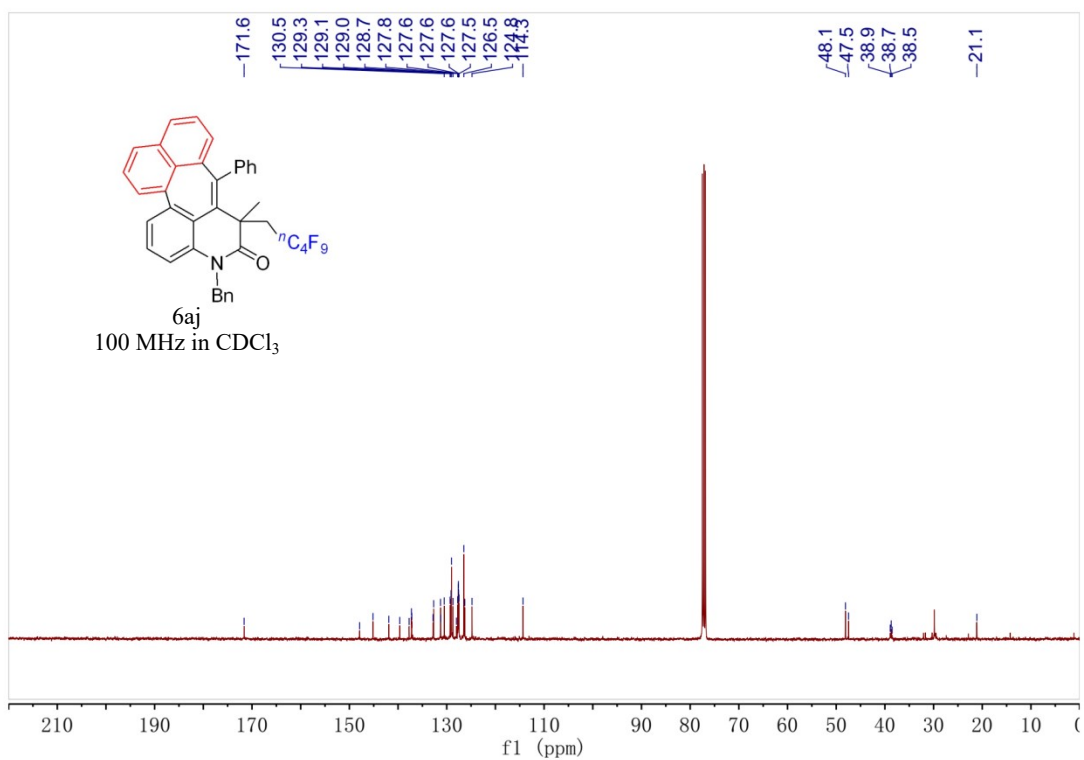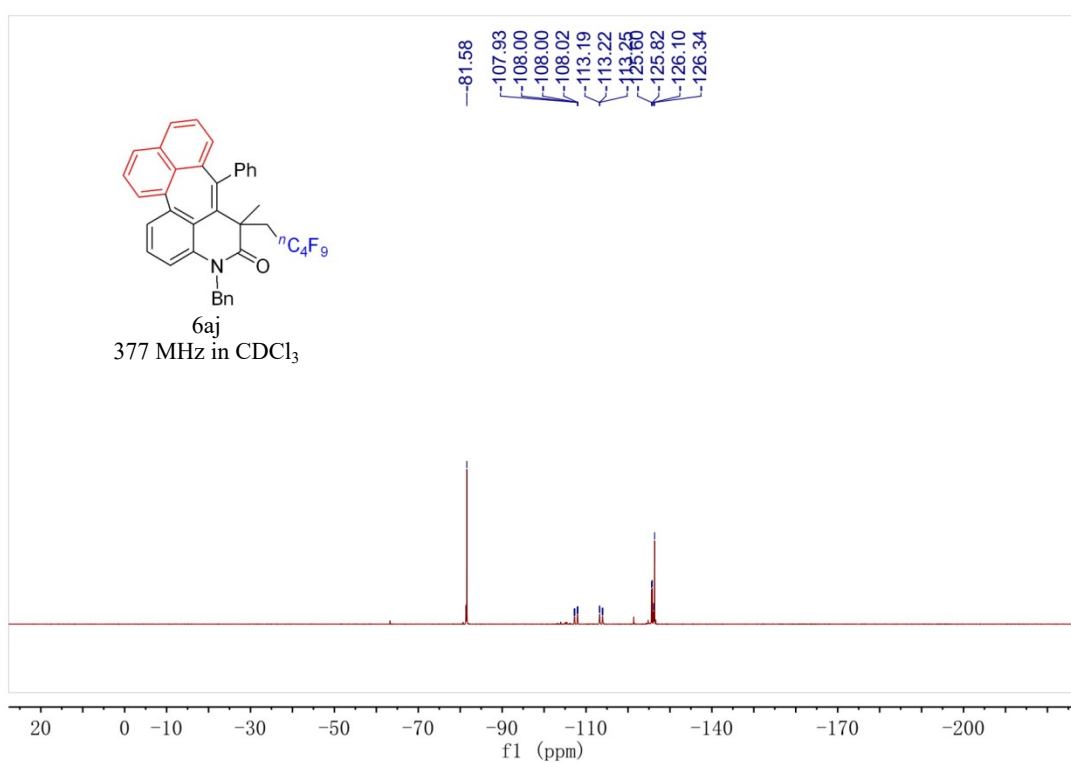

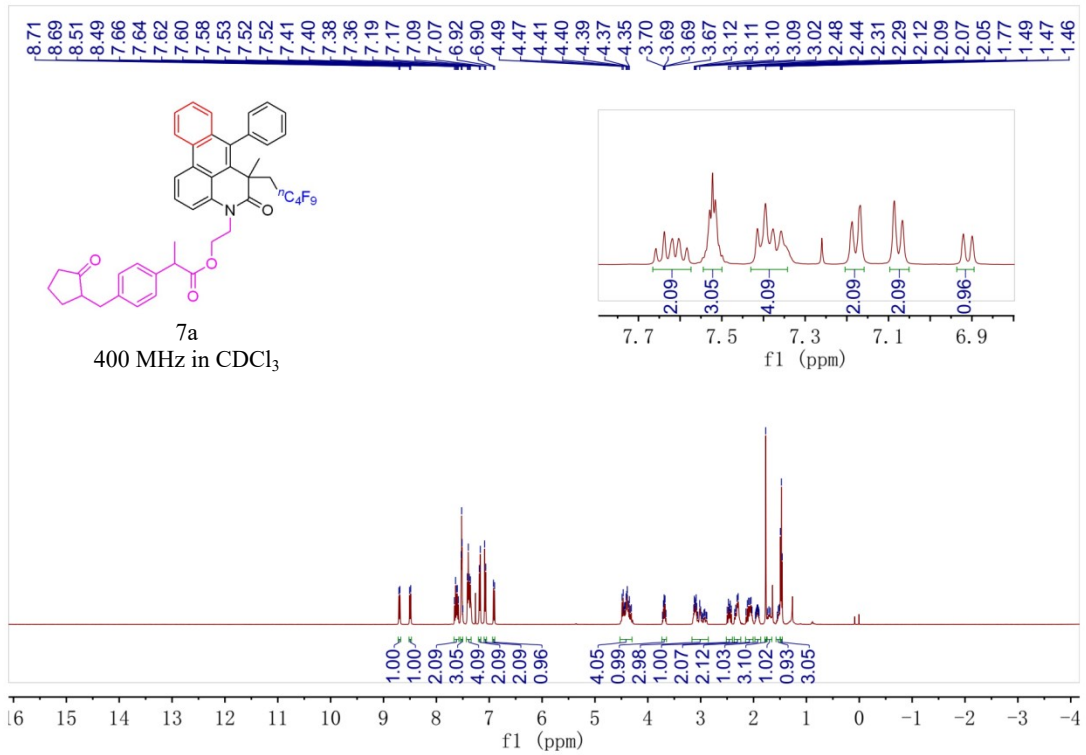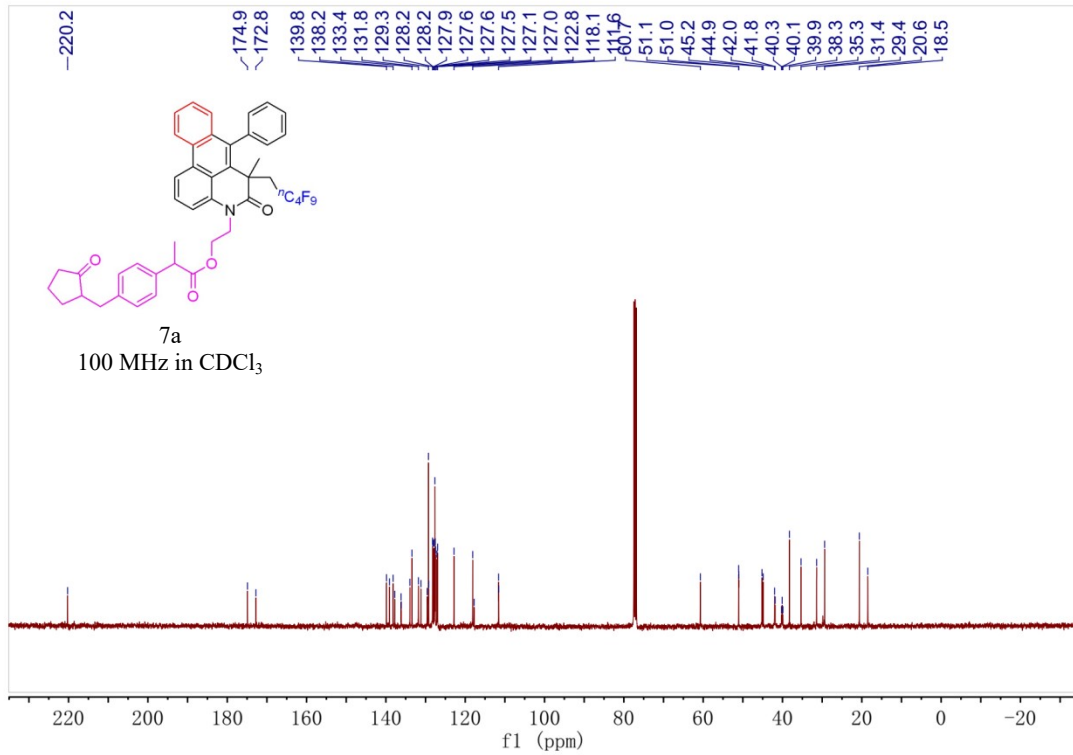



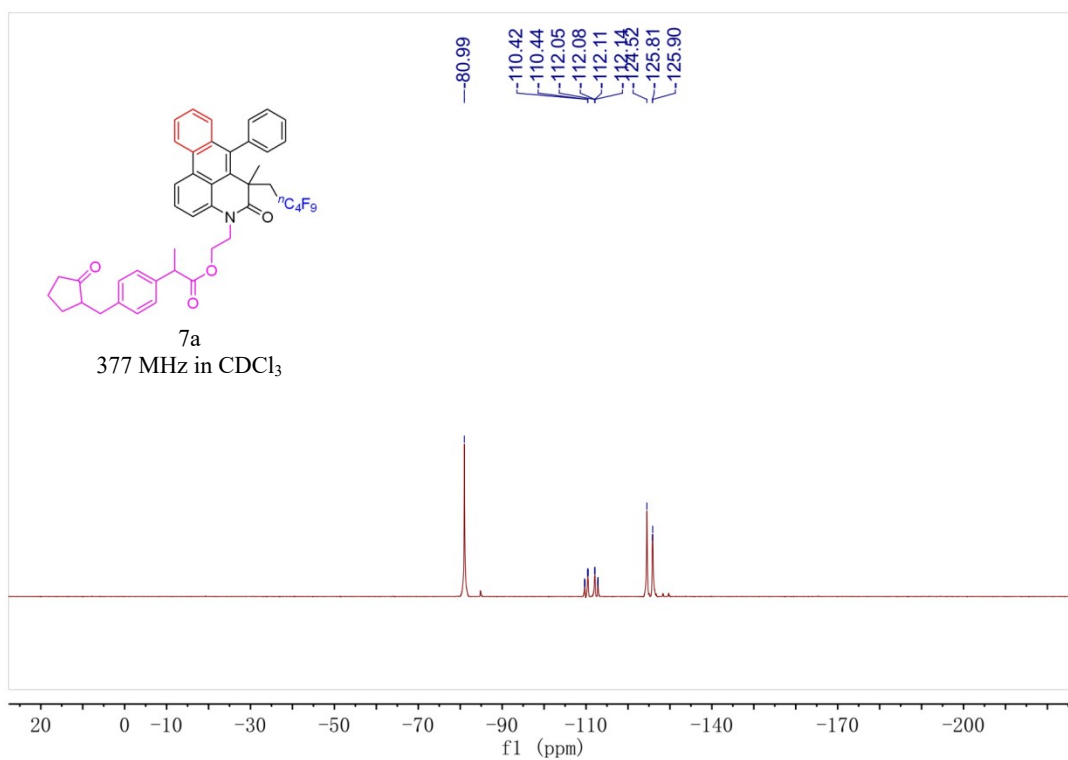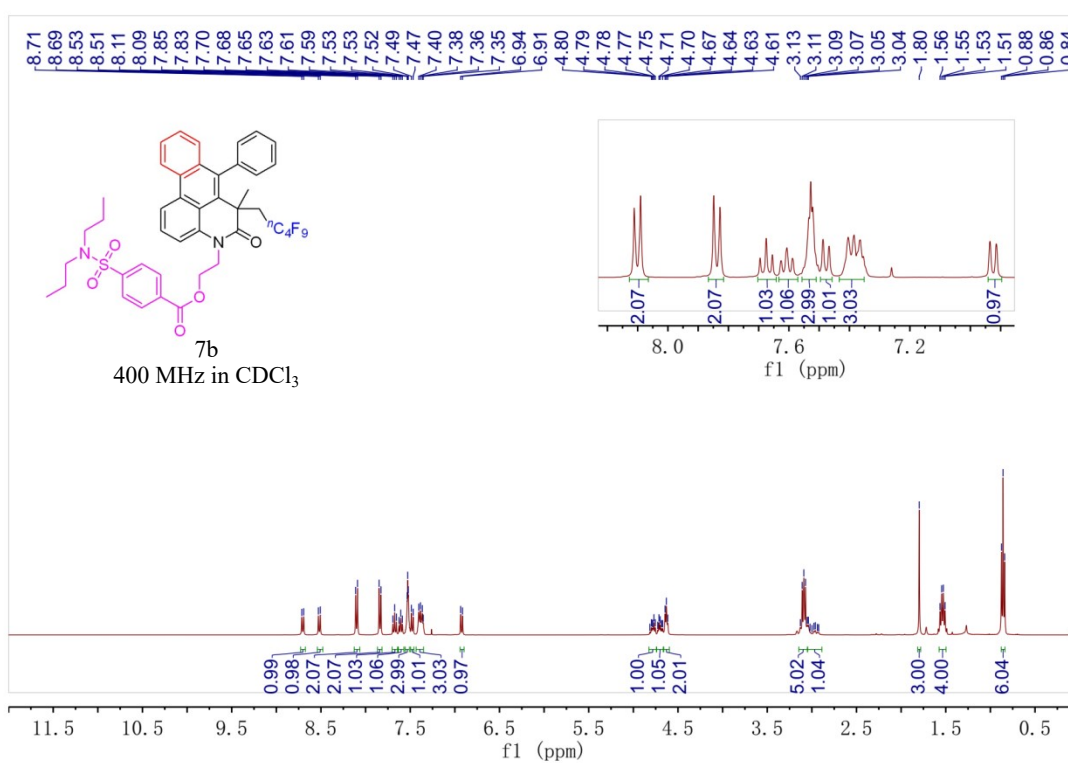

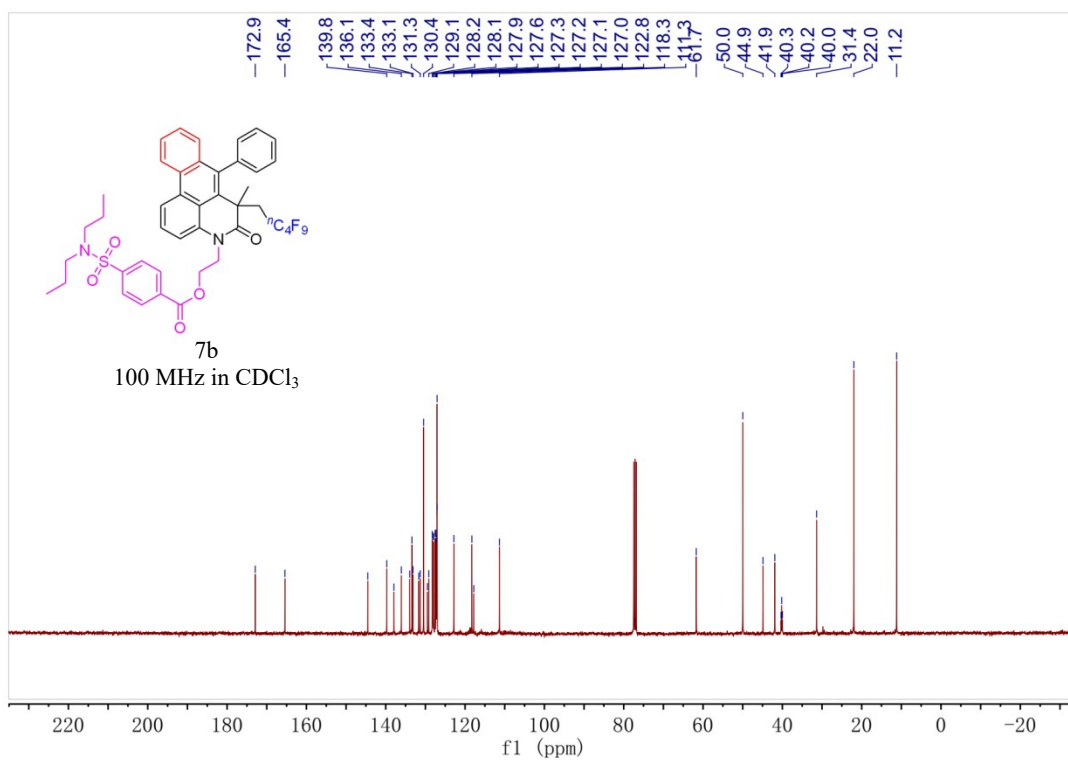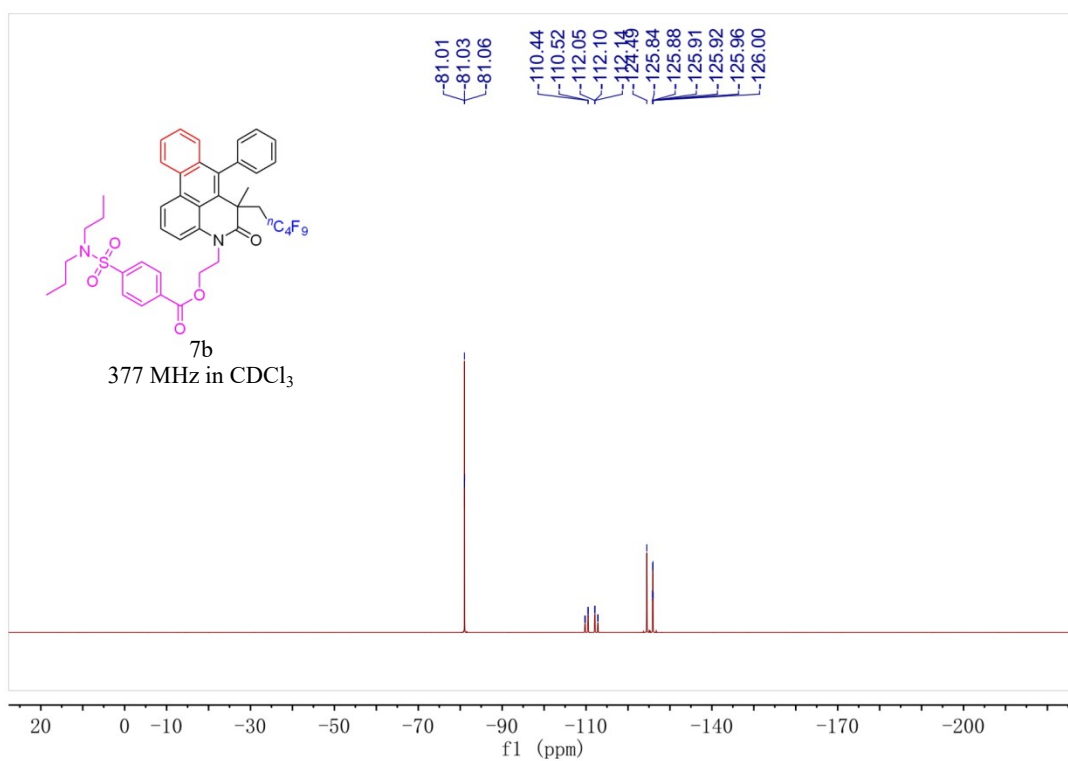

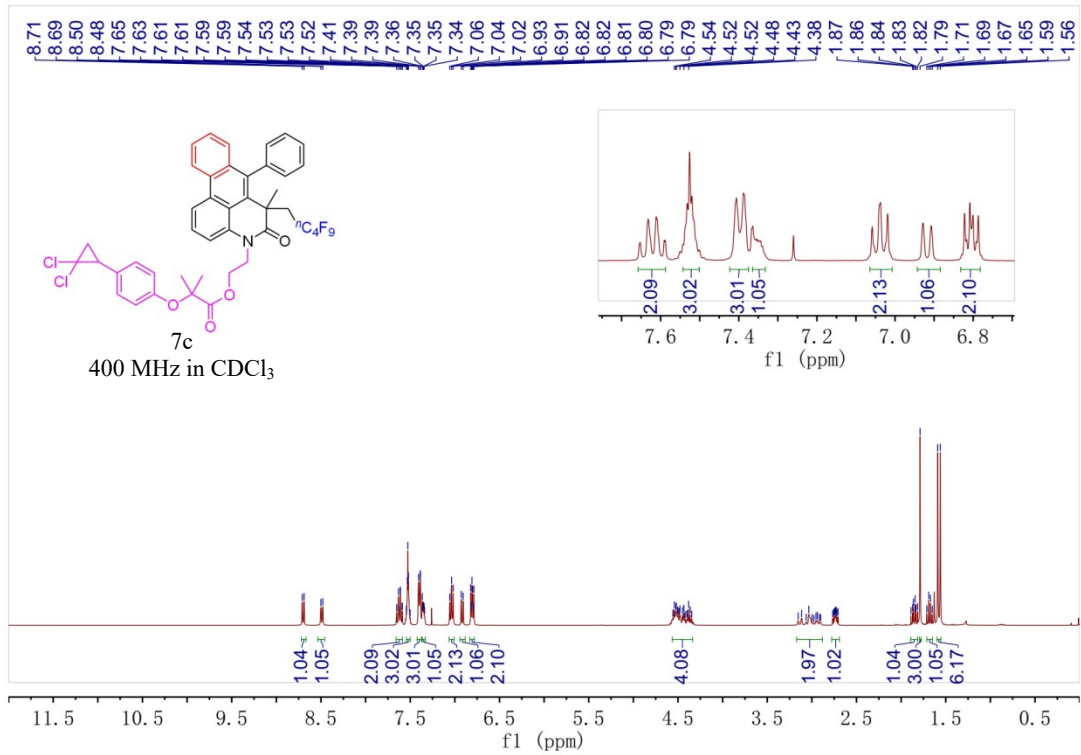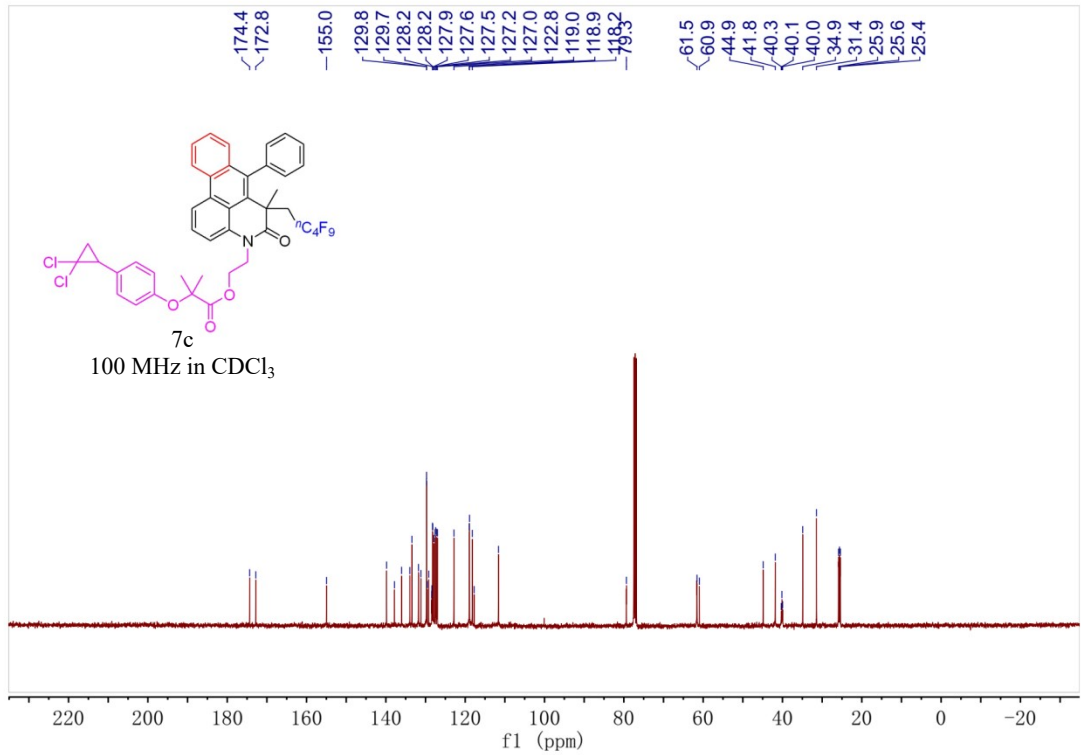

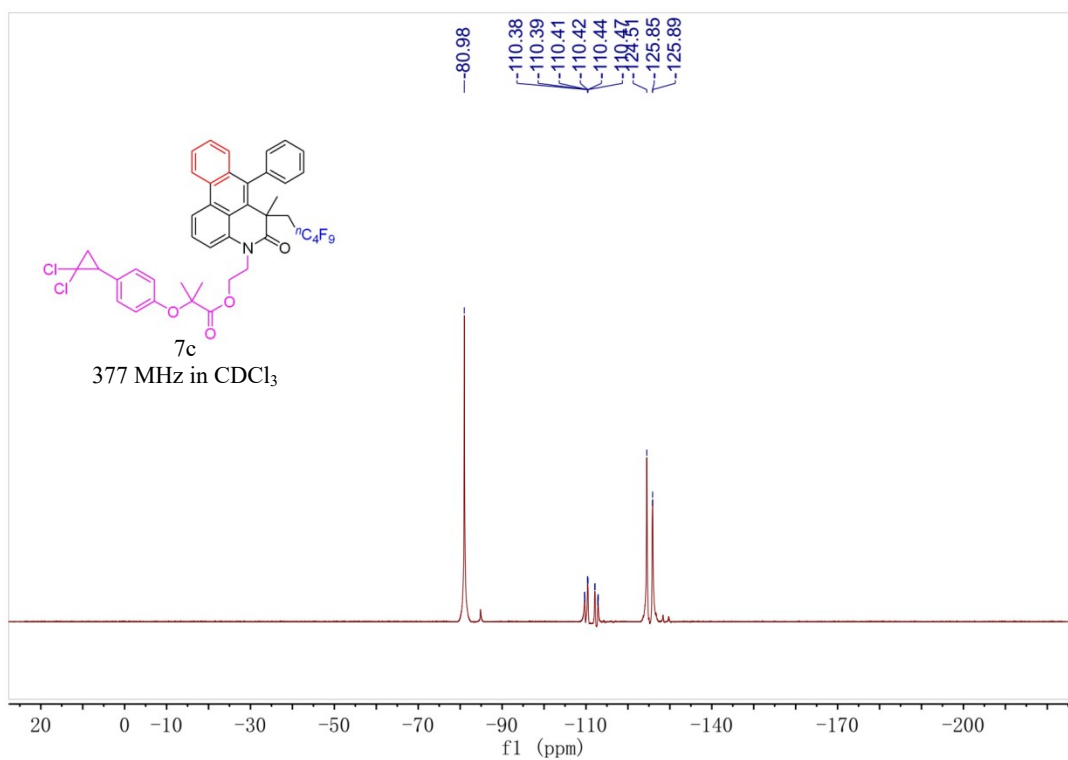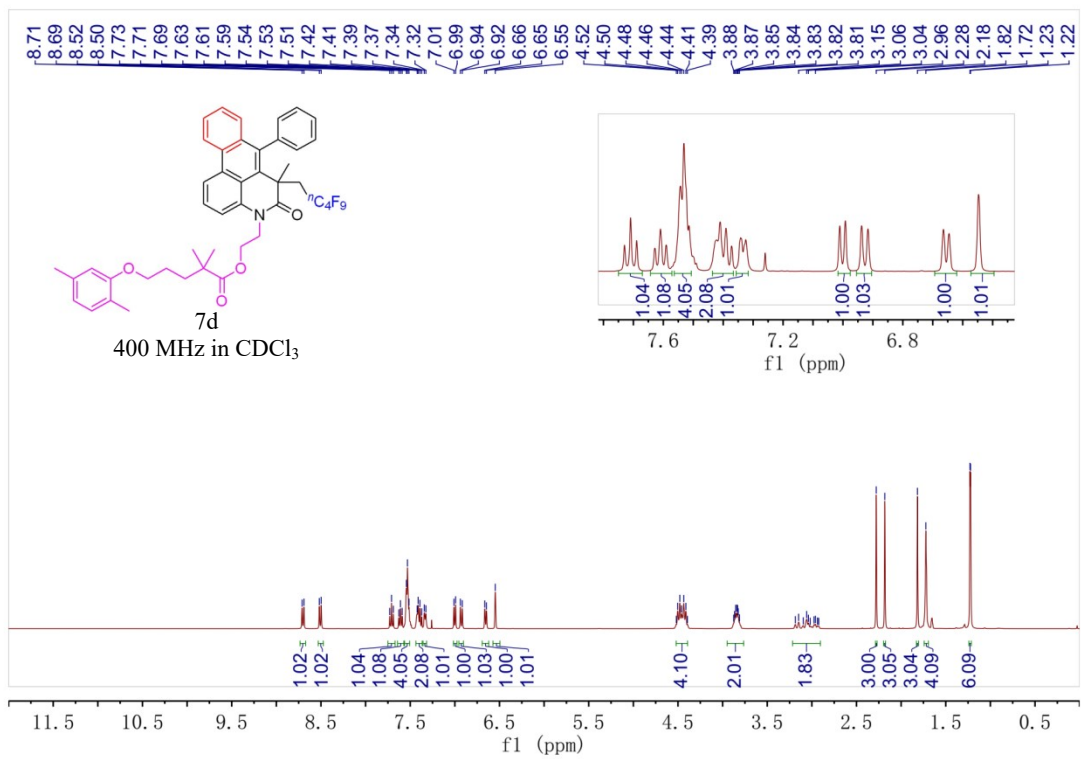

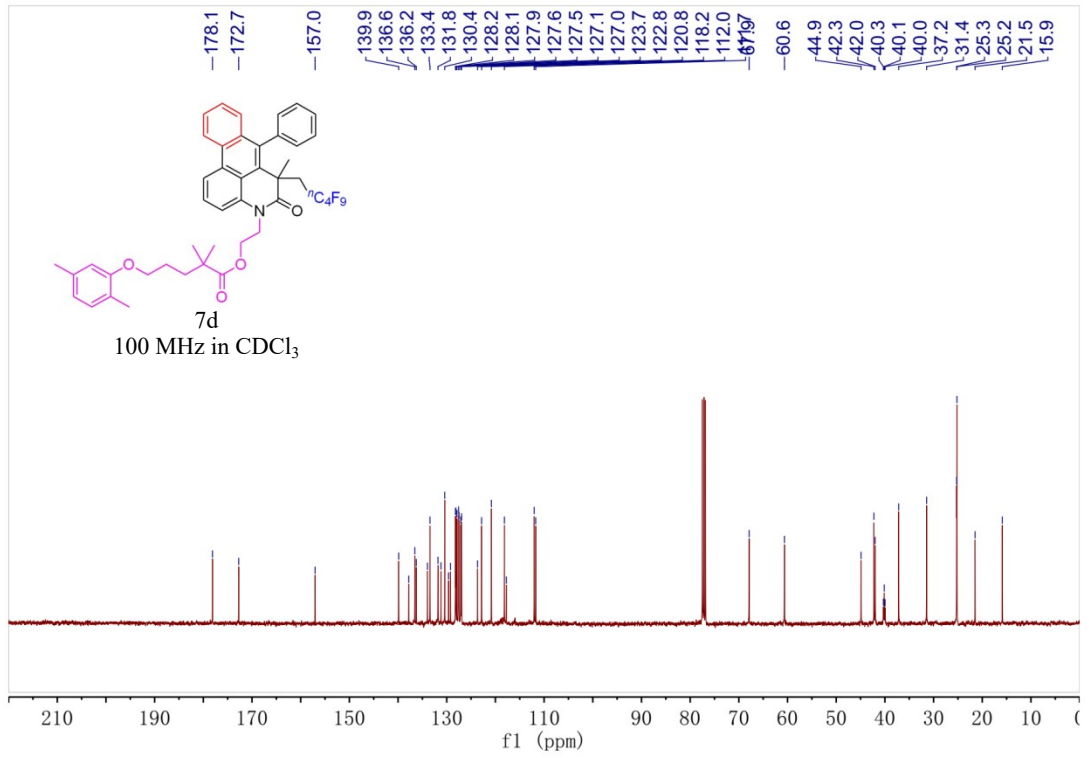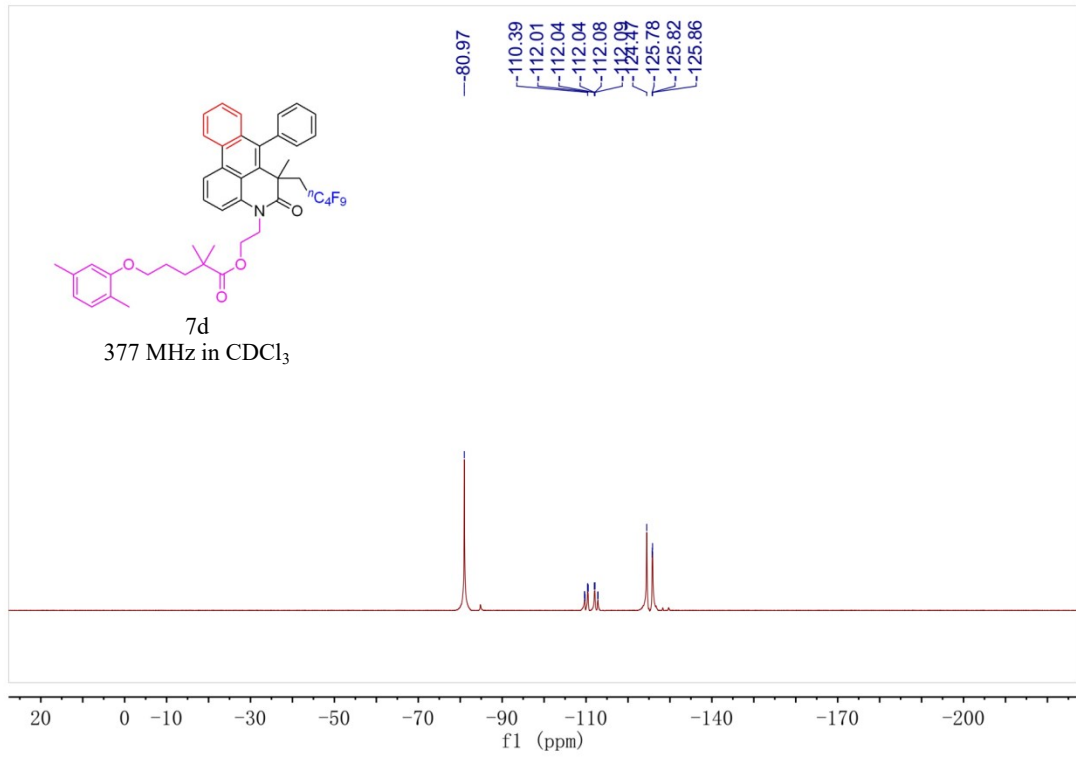

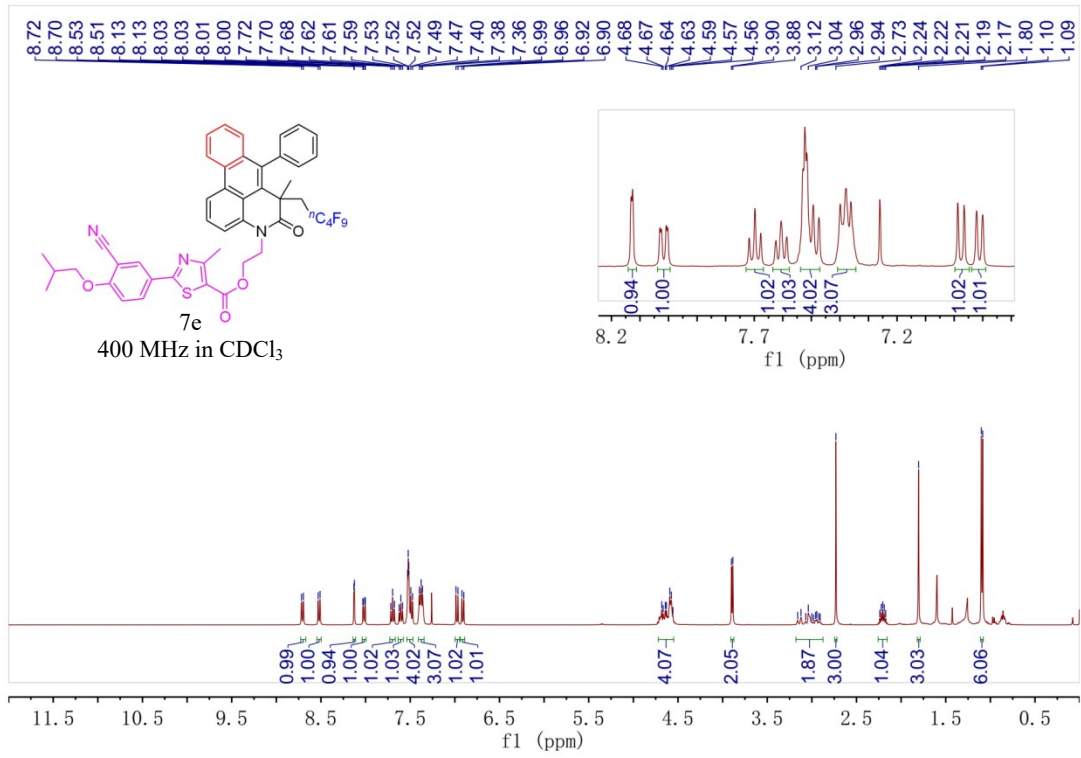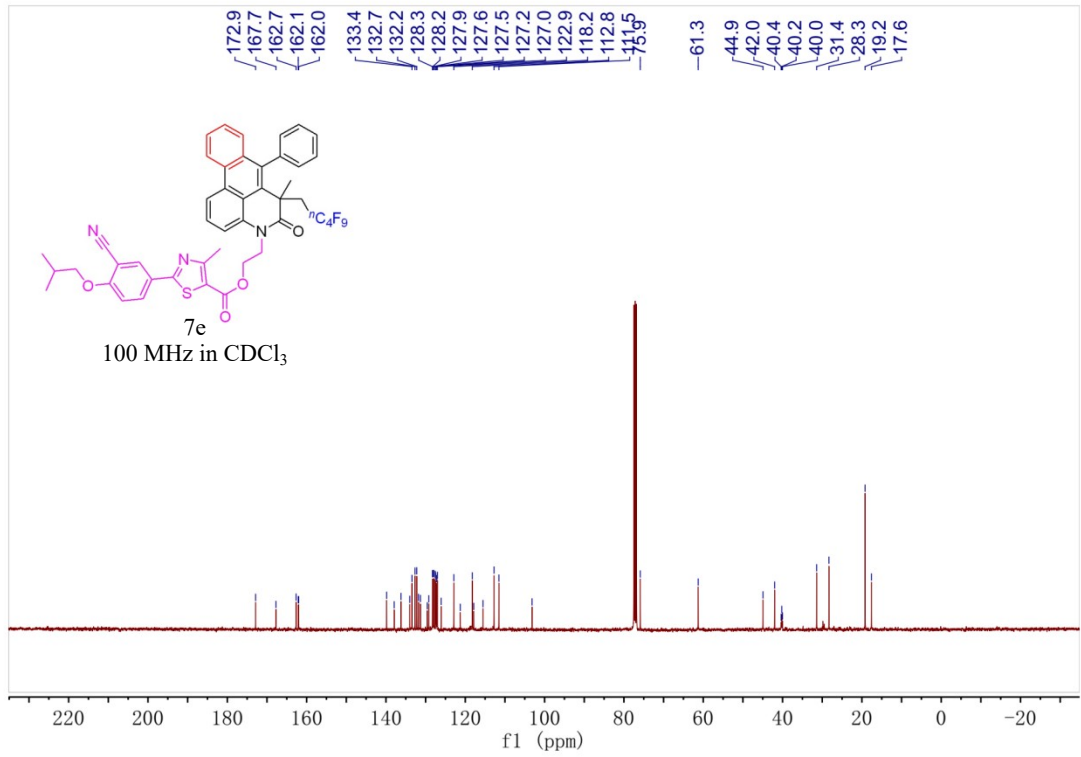

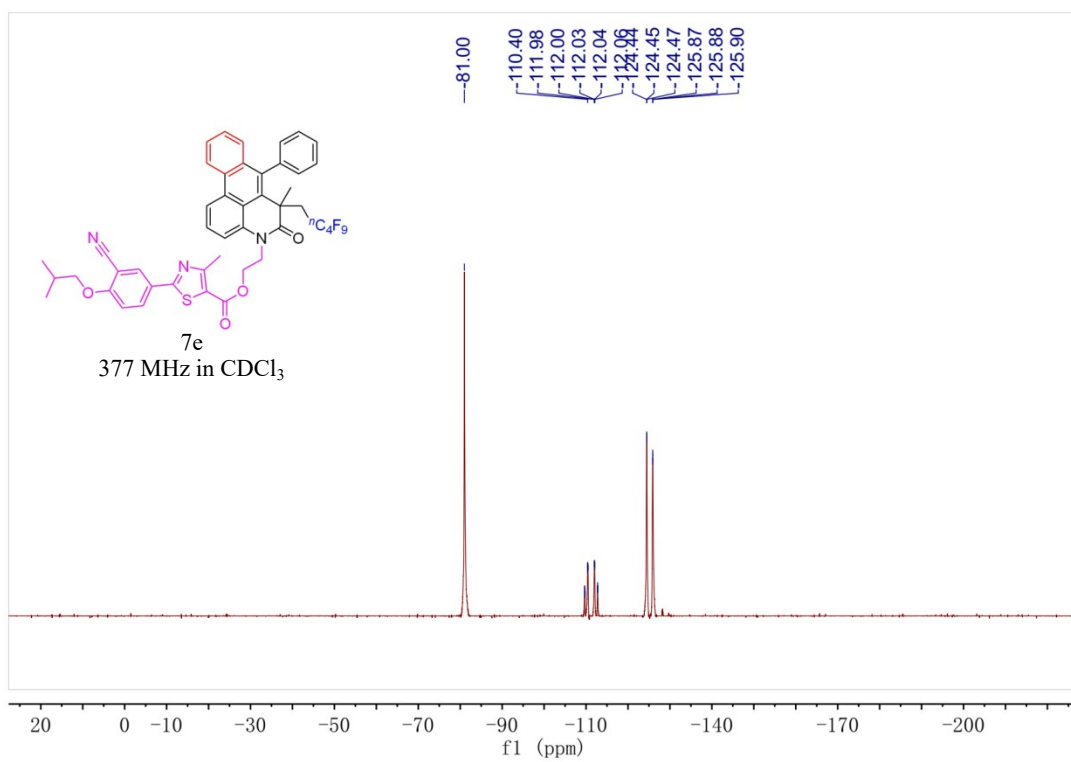

Supplement: d4qo01970a1.pdf [file d4qo01970a1.pdf]
